# Supplementary material
Source: publisher figshare collection journal article supplement (https://gsajournals.figshare.com/ndownloader/files/12955046)
Supplement: Supplementary file 1 [file 12955046]

Table S5: Results of nested GWAS of deltamethrin resistance.
Name_ID	Allele_1_clear	Allele_2_clear	Allele_1_wolbachia	Allele_2_wolbachia	p.value_SNP	padj_SNP	SNP_version6	Gene_name	Consequence	log10_P	Candidate gene
X2R_10621372_SNP	8,61E-10	4	61	6	74	0,000825651	2R:14733867	CR43428	downstream_gene_variant	9,06475107
X2R_10294461_SNP	8,82E-10	3	62	5	73	0,000825651	2R:14406956	CG17385	downstream_gene_variant	9,054495914
X2R_10294461_SNP	8,82E-10	3	62	5	73	0,000825651	2R:14406956	CR44369	upstream_gene_variant	9,054495914
X2R_10294461_SNP	8,82E-10	3	62	5	73	0,000825651	2R:14406956	Sin1	upstream_gene_variant	9,054495914
X2R_10460322_SNP	1,74E-09	3	62	6	73	0,001084139	2R:14572817	LamC	synonymous_variant	8,760116181	LamC
X2R_10460322_SNP	1,74E-09	3	62	6	73	0,001084139	2R:14572817	ttv	intron_variant	8,760116181	ttv
X2R_10715639_SNP	4,17E-09	63	3	75	5	0,001164255	2R:14828134	CG10205	upstream_gene_variant	8,379935292
X2R_10715639_SNP	4,17E-09	63	3	75	5	0,001164255	2R:14828134	CR45329	upstream_gene_variant	8,379935292
X2R_10705677_SNP	4,51E-09	64	3	75	5	0,001164255	2R:14818172	CG10202	missense_variant	8,345881432	CG10202
X2R_10713301_SNP	4,51E-09	3	64	5	75	0,001164255	2R:14825796	CR45329	upstream_gene_variant	8,345881432
X2R_10719564_SNP	4,51E-09	3	64	5	75	0,001164255	2R:14832059	CG10205	upstream_gene_variant	8,345881432
X2R_10700525_SNP	5,65E-09	3	64	5	73	0,001164255	2R:14813020	CG10202	downstream_gene_variant	8,247672924
X2R_10700525_SNP	5,65E-09	3	64	5	73	0,001164255	2R:14813020	hui	downstream_gene_variant	8,247672924
X2R_10666534_SNP	6,04E-09	18	46	11	67	0,001164255	2R:14779029	kn	intron_variant	8,218902955	kn
X2R_10721948_SNP	6,22E-09	3	64	5	73	0,001164255	2R:14834443	CG10205	downstream_gene_variant	8,206274066
X2R_10608747_SNP	8,02E-09	55	12	60	13	0,001364856	2R:14721242	-	intergenic_variant	8,09584269
X2R_10721104_SNP	1,39E-08	3	64	6	74	0,002165649	2R:14833599	CG10205	missense_variant	7,857552966	CG10205
X2R_10721104_SNP	1,39E-08	3	64	6	74	0,002165649	2R:14833599	CG10205	3_prime_UTR_variant	7,857552966	CG10205
X2L_17927212_SNP	1,53E-08	2	64	14	60	0,002200421	2L:17927212	-	intergenic_variant	7,815873235
X2R_10701426_SNP	1,86E-08	3	62	6	74	0,002486679	2R:14813921	CG10202	downstream_gene_variant	7,730574624
X2R_10701426_SNP	1,86E-08	3	62	6	74	0,002486679	2R:14813921	hui	downstream_gene_variant	7,730574624
X2R_10608749_SNP	2,08E-08	55	11	62	17	0,00259686	2R:14721244	-	intergenic_variant	7,681782601
X2R_10549497_SNP	4,28E-08	57	5	72	6	0,005006997	2R:14661992	Adgf-E	upstream_gene_variant	7,368625034
X2R_10549497_SNP	4,28E-08	57	5	72	6	0,005006997	2R:14661992	CG12860	downstream_gene_variant	7,368625034
X2R_10549497_SNP	4,28E-08	57	5	72	6	0,005006997	2R:14661992	CG12861	downstream_gene_variant	7,368625034
X2R_10549501_SNP	5,13E-08	59	5	73	6	0,005652609	2R:14661996	Adgf-E	upstream_gene_variant	7,289624421
X2R_10549501_SNP	5,13E-08	59	5	73	6	0,005652609	2R:14661996	CG12860	downstream_gene_variant	7,289624421
X2R_10549501_SNP	5,13E-08	59	5	73	6	0,005652609	2R:14661996	CG12861	downstream_gene_variant	7,289624421
X2R_10666527_SNP	8,55E-08	19	46	14	64	0,008896584	2R:14779022	kn	intron_variant	7,06782654	kn
X2R_10702960_SNP	9,89E-08	64	3	74	5	0,009352254	2R:14815455	CG10202	downstream_gene_variant	7,004854518
X2R_9211344_SNP	1,05E-07	37	21	57	20	0,009352254	2R:13323839	-	intergenic_variant	6,980384454
X2R_10666533_SNP	1,09E-07	19	46	12	66	0,009352254	2R:14779028	kn	intron_variant	6,962642437	kn
X2R_12370631_SNP	1,10E-07	2	64	11	68	0,009352254	2R:16483126	CG15712	downstream_gene_variant	6,95898334
X2R_12370631_SNP	1,10E-07	2	64	11	68	0,009352254	2R:16483126	CG33458	upstream_gene_variant	6,95898334
X2R_12370631_SNP	1,10E-07	2	64	11	68	0,009352254	2R:16483126	CG33459	upstream_gene_variant	6,95898334
X2R_9211343_SNP	1,38E-07	39	21	58	20	0,011215382	2R:13323838	-	intergenic_variant	6,860780409
X3R_26764213_SNP	1,58E-07	11	51	15	63	0,012362236	3R:30938491	CG15549	upstream_gene_variant	6,800014028
X3R_26764213_SNP	1,58E-07	11	51	15	63	0,012362236	3R:30938491	CG15550	upstream_gene_variant	6,800014028
X2R_10368189_SNP	2,44E-07	8	56	10	65	0,018294724	2R:14480684	CR44462	downstream_gene_variant	6,612056445
X2R_10368189_SNP	2,44E-07	8	56	10	65	0,018294724	2R:14480684	L	upstream_gene_variant	6,612056445
X2R_10666546_SNP	2,87E-07	17	45	11	61	0,020666368	2R:14779041	kn	intron_variant	6,542084814	kn
X2R_10720324_SNP	3,19E-07	5	58	10	69	0,022099798	2R:14832819	CG10205	upstream_gene_variant	6,496570244
X2L_8363433_DEL	3,57E-07	52	3	57	13	0,023860113	2L:8363433	CG7627	upstream_gene_variant	6,447491785
X2L_8363433_DEL	3,57E-07	52	3	57	13	0,023860113	2L:8363433	CSN8	upstream_gene_variant	6,447491785
X2L_8363433_DEL	3,57E-07	52	3	57	13	0,023860113	2L:8363433	Pp2A-29B	upstream_gene_variant	6,447491785
X2L_8363433_DEL	3,57E-07	52	3	57	13	0,023860113	2L:8363433	RpS13	downstream_gene_variant	6,447491785
X2R_10676596_SNP	4,31E-07	64	3	74	6	0,026974297	2R:14789091	kn	intron_variant	6,365223361	kn
X2R_11051009_SNP	4,44E-07	66	73	6	NA	0,026974297	2R:15163504	CR43831	upstream_gene_variant	6,35297596
X2R_11051009_SNP	4,44E-07	66	73	6	NA	0,026974297	2R:15163504	igl	intron_variant	6,35297596	igl
X2R_11051009_SNP	4,44E-07	66	73	6	NA	0,026974297	2R:15163504	igl	upstream_gene_variant	6,35297596
X2L_18000246_SNP	4,47E-07	62	4	69	8	0,026974297	2L:18000246	CR44604	upstream_gene_variant	6,350010493
X2L_18000246_SNP	4,47E-07	62	4	69	8	0,026974297	2L:18000246	CR44605	upstream_gene_variant	6,350010493
X2L_4376521_SNP	6,12E-07	17	47	27	51	0,03441051	2L:4376521	CG17612	downstream_gene_variant	6,213044678
X2L_4376521_SNP	6,12E-07	17	47	27	51	0,03441051	2L:4376521	Traf4	intron_variant	6,213044678	Traf4
X2R_14706717_SNP	6,13E-07	19	47	22	54	0,03441051	2R:18819212	CG15096	upstream_gene_variant	6,212193715
X2R_14706717_SNP	6,13E-07	19	47	22	54	0,03441051	2R:18819212	CG15097	downstream_gene_variant	6,212193715
X2R_14706717_SNP	6,13E-07	19	47	22	54	0,03441051	2R:18819212	CR43418	downstream_gene_variant	6,212193715
X2R_14706717_SNP	6,13E-07	19	47	22	54	0,03441051	2R:18819212	Phb2	upstream_gene_variant	6,212193715
X2L_3271765_SNP	6,25E-07	36	26	42	34	0,03441051	2L:3271765	CG3332	downstream_gene_variant	6,204152295
X2L_3271765_SNP	6,25E-07	36	26	42	34	0,03441051	2L:3271765	CG3347	3_prime_UTR_variant	6,204152295	CG3347
X2L_3271765_SNP	6,25E-07	36	26	42	34	0,03441051	2L:3271765	CR44484	downstream_gene_variant	6,204152295
X2R_10508071_SNP	7,56E-07	55	10	55	22	0,040453053	2R:14620566	CG12863	splice_region_variant,intron_variant	6,121302971	CG12863
X2R_10508071_SNP	7,56E-07	55	10	55	22	0,040453053	2R:14620566	Sec61beta	downstream_gene_variant	6,121302971
X2R_10508071_SNP	7,56E-07	55	10	55	22	0,040453053	2R:14620566	snoRNA:Me18S-A1061	upstream_gene_variant	6,121302971
X2R_10508071_SNP	7,56E-07	55	10	55	22	0,040453053	2R:14620566	snoRNA:Me18S-C1366	upstream_gene_variant	6,121302971
X2R_10508071_SNP	7,56E-07	55	10	55	22	0,040453053	2R:14620566	snoRNA:Me18S-G1952	upstream_gene_variant	6,121302971
X2R_10508071_SNP	7,56E-07	55	10	55	22	0,040453053	2R:14620566	snoRNA:Me28S-A992	upstream_gene_variant	6,121302971
X2R_10508071_SNP	7,56E-07	55	10	55	22	0,040453053	2R:14620566	snoRNA:Me28S-C3227a	upstream_gene_variant	6,121302971
X2R_10508071_SNP	7,56E-07	55	10	55	22	0,040453053	2R:14620566	snoRNA:Me28S-C3227b	upstream_gene_variant	6,121302971
X2R_10508071_SNP	7,56E-07	55	10	55	22	0,040453053	2R:14620566	snoRNA:Me28S-G2703a	upstream_gene_variant	6,121302971
X2R_10508071_SNP	7,56E-07	55	10	55	22	0,040453053	2R:14620566	snoRNA:Me28S-G2703b	upstream_gene_variant	6,121302971
X2R_10508071_SNP	7,56E-07	55	10	55	22	0,040453053	2R:14620566	snoRNA:Me28S-G2703c	upstream_gene_variant	6,121302971
X2R_10508071_SNP	7,56E-07	55	10	55	22	0,040453053	2R:14620566	snoRNA:Me28S-U1848	upstream_gene_variant	6,121302971
X2R_10508071_SNP	7,56E-07	55	10	55	22	0,040453053	2R:14620566	snoRNA:Or-CD4	upstream_gene_variant	6,121302971
X2R_10508071_SNP	7,56E-07	55	10	55	22	0,040453053	2R:14620566	Su(var)2-HP2	upstream_gene_variant	6,121302971
X2R_10508071_SNP	7,56E-07	55	10	55	22	0,040453053	2R:14620566	Uhg5	upstream_gene_variant	6,121302971
X2R_10508075_SNP	8,78E-07	56	10	56	22	0,045644393	2R:14620570	CG12863	splice_region_variant,intron_variant	6,056632378	CG12863
X2R_10508075_SNP	8,78E-07	56	10	56	22	0,045644393	2R:14620570	Sec61beta	downstream_gene_variant	6,056632378
X2R_10508075_SNP	8,78E-07	56	10	56	22	0,045644393	2R:14620570	snoRNA:Me18S-A1061	upstream_gene_variant	6,056632378
X2R_10508075_SNP	8,78E-07	56	10	56	22	0,045644393	2R:14620570	snoRNA:Me18S-C1366	upstream_gene_variant	6,056632378
X2R_10508075_SNP	8,78E-07	56	10	56	22	0,045644393	2R:14620570	snoRNA:Me18S-G1952	upstream_gene_variant	6,056632378
X2R_10508075_SNP	8,78E-07	56	10	56	22	0,045644393	2R:14620570	snoRNA:Me28S-A992	upstream_gene_variant	6,056632378
X2R_10508075_SNP	8,78E-07	56	10	56	22	0,045644393	2R:14620570	snoRNA:Me28S-C3227a	upstream_gene_variant	6,056632378
X2R_10508075_SNP	8,78E-07	56	10	56	22	0,045644393	2R:14620570	snoRNA:Me28S-C3227b	upstream_gene_variant	6,056632378
X2R_10508075_SNP	8,78E-07	56	10	56	22	0,045644393	2R:14620570	snoRNA:Me28S-G2703a	upstream_gene_variant	6,056632378
X2R_10508075_SNP	8,78E-07	56	10	56	22	0,045644393	2R:14620570	snoRNA:Me28S-G2703b	upstream_gene_variant	6,056632378
X2R_10508075_SNP	8,78E-07	56	10	56	22	0,045644393	2R:14620570	snoRNA:Me28S-G2703c	upstream_gene_variant	6,056632378
X2R_10508075_SNP	8,78E-07	56	10	56	22	0,045644393	2R:14620570	snoRNA:Me28S-U1848	upstream_gene_variant	6,056632378
X2R_10508075_SNP	8,78E-07	56	10	56	22	0,045644393	2R:14620570	snoRNA:Or-CD4	upstream_gene_variant	6,056632378
X2R_10508075_SNP	8,78E-07	56	10	56	22	0,045644393	2R:14620570	Su(var)2-HP2	upstream_gene_variant	6,056632378
X2R_10508075_SNP	8,78E-07	56	10	56	22	0,045644393	2R:14620570	Uhg5	upstream_gene_variant	6,056632378
X2R_10709770_SNP	9,70E-07	61	6	72	6	0,049068954	2R:14822265	CG10202	upstream_gene_variant	6,01331379
X2R_10709770_SNP	9,70E-07	61	6	72	6	0,049068954	2R:14822265	CR45329	downstream_gene_variant	6,01331379
X2R_6949149_SNP	1,21E-06	11	55	16	61	0,059441112	2R:11061644	luna	intron_variant	5,918451796	lu
X3L_12710782_SNP	1,29E-06	5	60	7	72	0,061186495	3L:12717682	-	intergenic_variant	5,889262857
X2L_17941934_SNP	1,31E-06	2	63	10	66	0,061186495	2L:17941934	CR44399	upstream_gene_variant	5,882824193
X2R_12245315_SNP	1,34E-06	2	65	6	73	0,061186495	2R:16357810	CG30098	upstream_gene_variant	5,872882886
X2R_12245315_SNP	1,34E-06	2	65	6	73	0,061186495	2R:16357810	CG6262	upstream_gene_variant	5,872882886
X2R_12245315_SNP	1,34E-06	2	65	6	73	0,061186495	2R:16357810	CR43416	non_coding_transcript_exon_variant	5,872882886	CR43416
X2R_12245315_SNP	1,34E-06	2	65	6	73	0,061186495	2R:16357810	CR45322	downstream_gene_variant	5,872882886
X2R_10572926_SNP	1,39E-06	48	18	59	18	0,061888617	2R:14685421	mspo	intron_variant	5,857462248	mspo
X2R_17775940_SNP	1,44E-06	10	55	9	68	0,062824439	2R:21888435	Fili	intron_variant	5,840725242	Fili
X2R_11480287_SNP	1,55E-06	58	8	59	16	0,065330619	2R:15592782	-	intergenic_variant	5,808834417
X2L_9157591_DEL	1,57E-06	47	2	59	5	0,065330619	2L:9157591	CG32982	intron_variant	5,803993032	CG32982
X2R_7475070_SNP	1,64E-06	59	6	68	9	0,066170461	2R:11587565	tou	synonymous_variant	5,784707525	tou
X2R_7475070_SNP	1,64E-06	59	6	68	9	0,066170461	2R:11587565	snoRNA:Psi28S-1180	downstream_gene_variant	5,784707525
X2R_7475070_SNP	1,64E-06	59	6	68	9	0,066170461	2R:11587565	snoRNA:Psi28S-1936	downstream_gene_variant	5,784707525
X2R_7475070_SNP	1,64E-06	59	6	68	9	0,066170461	2R:11587565	tou	intron_variant	5,784707525	tou
X2R_7475070_SNP	1,64E-06	59	6	68	9	0,066170461	2R:11587565	tou	upstream_gene_variant	5,784707525
X3L_12710777_SNP	1,66E-06	61	5	72	8	0,066170461	3L:12717677	-	intergenic_variant	5,7795603
X2R_14010795_SNP	1,70E-06	4	63	5	75	0,066222952	2R:18123290	Spn55B	upstream_gene_variant	5,770072545
X2R_14010795_SNP	1,70E-06	4	63	5	75	0,066222952	2R:18123290	stau	intron_variant	5,770072545	stau
X2R_17775930_SNP	1,79E-06	10	56	10	69	0,06824035	2R:21888425	Fili	intron_variant	5,74808499	Fili
X2L_7033624_SNP	2,02E-06	66	1	75	5	0,075705765	2L:7033624	Caper	intron_variant	5,694223359	Caper
X2L_7033624_SNP	2,02E-06	66	1	75	5	0,075705765	2L:7033624	CG3476	downstream_gene_variant	5,694223359
X2L_7033624_SNP	2,02E-06	66	1	75	5	0,075705765	2L:7033624	milt	upstream_gene_variant	5,694223359
X2L_7033624_SNP	2,02E-06	66	1	75	5	0,075705765	2L:7033624	Rab30	upstream_gene_variant	5,694223359
X2R_10508081_SNP	2,16E-06	55	11	56	23	0,079436231	2R:14620576	CG12863	intron_variant	5,664733512	CG12863
X2R_10508081_SNP	2,16E-06	55	11	56	23	0,079436231	2R:14620576	Sec61beta	downstream_gene_variant	5,664733512
X2R_10508081_SNP	2,16E-06	55	11	56	23	0,079436231	2R:14620576	snoRNA:Me18S-A1061	upstream_gene_variant	5,664733512
X2R_10508081_SNP	2,16E-06	55	11	56	23	0,079436231	2R:14620576	snoRNA:Me18S-C1366	upstream_gene_variant	5,664733512
X2R_10508081_SNP	2,16E-06	55	11	56	23	0,079436231	2R:14620576	snoRNA:Me18S-G1952	upstream_gene_variant	5,664733512
X2R_10508081_SNP	2,16E-06	55	11	56	23	0,079436231	2R:14620576	snoRNA:Me28S-A992	upstream_gene_variant	5,664733512
X2R_10508081_SNP	2,16E-06	55	11	56	23	0,079436231	2R:14620576	snoRNA:Me28S-C3227a	upstream_gene_variant	5,664733512
X2R_10508081_SNP	2,16E-06	55	11	56	23	0,079436231	2R:14620576	snoRNA:Me28S-C3227b	upstream_gene_variant	5,664733512
X2R_10508081_SNP	2,16E-06	55	11	56	23	0,079436231	2R:14620576	snoRNA:Me28S-G2703a	upstream_gene_variant	5,664733512
X2R_10508081_SNP	2,16E-06	55	11	56	23	0,079436231	2R:14620576	snoRNA:Me28S-G2703b	upstream_gene_variant	5,664733512
X2R_10508081_SNP	2,16E-06	55	11	56	23	0,079436231	2R:14620576	snoRNA:Me28S-G2703c	upstream_gene_variant	5,664733512
X2R_10508081_SNP	2,16E-06	55	11	56	23	0,079436231	2R:14620576	snoRNA:Me28S-U1848	upstream_gene_variant	5,664733512
X2R_10508081_SNP	2,16E-06	55	11	56	23	0,079436231	2R:14620576	snoRNA:Or-CD4	upstream_gene_variant	5,664733512
X2R_10508081_SNP	2,16E-06	55	11	56	23	0,079436231	2R:14620576	Su(var)2-HP2	upstream_gene_variant	5,664733512
X2R_10508081_SNP	2,16E-06	55	11	56	23	0,079436231	2R:14620576	Uhg5	upstream_gene_variant	5,664733512
X2R_10622222_SNP	2,23E-06	48	12	59	14	0,080149444	2R:14734717	CG12858	downstream_gene_variant	5,65241846
X2R_10622222_SNP	2,23E-06	48	12	59	14	0,080149444	2R:14734717	CR43428	downstream_gene_variant	5,65241846
X2R_10453850_SNP	2,28E-06	8	58	18	62	0,080587888	2R:14566345	LamC	downstream_gene_variant	5,641776672
X2R_10453850_SNP	2,28E-06	8	58	18	62	0,080587888	2R:14566345	ttv	intron_variant	5,641776672	ttv
X2L_9202525_SNP	2,49E-06	11	50	18	59	0,086187965	2L:9202525	tai	intron_variant	5,604481931	tai
X2R_10711040_SNP	2,63E-06	6	60	12	68	0,088633891	2R:14823535	CG10202	upstream_gene_variant	5,579458432
X2R_10711040_SNP	2,63E-06	6	60	12	68	0,088633891	2R:14823535	CR45329	downstream_gene_variant	5,579458432
X2R_15203387_SNP	2,70E-06	64	2	71	5	0,088633891	2R:19315882	Rgk1	intron_variant	5,569122757	Rgk1
X2R_10724961_SNP	2,70E-06	58	6	69	9	0,088633891	2R:14837456	CG10205	downstream_gene_variant	5,568847644
X2L_21606033_SNP	2,80E-06	63	1	69	5	0,090500592	2L:21606033	-	intergenic_variant	5,552242901
X2R_10304901_SNP	3,00E-06	46	19	51	28	0,094904517	2R:14417396	CG17386	upstream_gene_variant	5,522792329
X2R_10304901_SNP	3,00E-06	46	19	51	28	0,094904517	2R:14417396	Sin1	downstream_gene_variant	5,522792329
X2R_10188073_SNP	3,09E-06	3	62	7	72	0,094904517	2R:14300568	tej	missense_variant	5,510555248	tej
X2R_10188073_SNP	3,09E-06	3	62	7	72	0,094904517	2R:14300568	Ih	downstream_gene_variant	5,510555248
X2R_9632130_SNP	3,09E-06	13	52	23	53	0,094904517	2R:13744625	fas	intron_variant	5,509705599	fas
X2L_9157691_SNP	3,16E-06	1	64	5	74	0,095547122	2L:9157691	CG32982	intron_variant	5,499713016	CG32982
X2R_15044705_SNP	3,25E-06	3	64	8	69	0,096431774	2R:19157200	ena	intron_variant	5,488761611	e
X_21217566_SNP	3,37E-06	60	7	72	8	0,098716878	X:21346539	dod	3_prime_UTR_variant	5,47175093	dod
X_21217566_SNP	3,37E-06	60	7	72	8	0,098716878	X:21346539	fliI	downstream_gene_variant	5,47175093
X_21217566_SNP	3,37E-06	60	7	72	8	0,098716878	X:21346539	pen	3_prime_UTR_variant	5,47175093	pen
X_21217566_SNP	3,37E-06	60	7	72	8	0,098716878	X:21346539	sol	upstream_gene_variant	5,47175093
X2R_10585509_SNP	3,56E-06	61	6	68	10	0,099640979	2R:14698004	mspo	intron_variant	5,448791981	mspo
X2L_19936068_SNP	3,62E-06	13	52	11	63	0,099640979	2L:19936068	CR45183	upstream_gene_variant	5,440799827
X2L_19936068_SNP	3,62E-06	13	52	11	63	0,099640979	2L:19936068	sick	intron_variant	5,440799827	sick
X2R_15044694_SNP	3,73E-06	64	3	69	9	0,099640979	2R:19157189	ena	intron_variant	5,428260547	e
X2R_10734268_SNP	3,81E-06	3	64	7	69	0,099640979	2R:14846763	CG10209	synonymous_variant	5,41852686	CG10209
X2R_10734268_SNP	3,81E-06	3	64	7	69	0,099640979	2R:14846763	NaPi-T	upstream_gene_variant	5,41852686
X2R_10734268_SNP	3,81E-06	3	64	7	69	0,099640979	2R:14846763	SMC2	downstream_gene_variant	5,41852686
X2R_6064333_SNP	3,85E-06	24	37	20	47	0,099640979	2R:10176828	KCNQ	intron_variant	5,414475992	KCNQ
X2R_17775943_SNP	3,93E-06	56	10	67	8	0,099640979	2R:21888438	Fili	intron_variant	5,405969623	Fili
X2R_10622345_SNP	4,00E-06	20	46	19	58	0,099640979	2R:14734840	CG12858	downstream_gene_variant	5,397904832
X2R_10622345_SNP	4,00E-06	20	46	19	58	0,099640979	2R:14734840	CR43428	downstream_gene_variant	5,397904832
X2L_17944451_SNP	4,00E-06	64	1	66	9	0,099640979	2L:17944451	CR44398	downstream_gene_variant	5,397716079
X2L_17944451_SNP	4,00E-06	64	1	66	9	0,099640979	2L:17944451	CR44399	upstream_gene_variant	5,397716079
X2R_10700594_SNP	4,06E-06	48	6	68	6	0,099640979	2R:14813089	CG10202	downstream_gene_variant	5,391164829
X2R_10700594_SNP	4,06E-06	48	6	68	6	0,099640979	2R:14813089	hui	downstream_gene_variant	5,391164829
X2R_11661653_SNP	4,07E-06	2	65	5	75	0,099640979	2R:15774148	Zasp52	intron_variant	5,390424478	Zasp52
X2R_10585511_SNP	4,08E-06	8	55	11	60	0,099640979	2R:14698006	mspo	intron_variant	5,38981825	mspo
X3R_7853526_SNP	4,13E-06	6	59	12	64	0,099640979	3R:12027804	CG31358	3_prime_UTR_variant	5,384113362	CG31358
X3R_7853526_SNP	4,13E-06	6	59	12	64	0,099640979	3R:12027804	CG31358	downstream_gene_variant	5,384113362
X3R_7853526_SNP	4,13E-06	6	59	12	64	0,099640979	3R:12027804	CG42504	downstream_gene_variant	5,384113362
X3R_7853526_SNP	4,13E-06	6	59	12	64	0,099640979	3R:12027804	CG42505	downstream_gene_variant	5,384113362
X2R_12228554_SNP	4,13E-06	3	63	16	62	0,099640979	2R:16341049	CG7997	downstream_gene_variant	5,383575743
X2R_12228554_SNP	4,13E-06	3	63	16	62	0,099640979	2R:16341049	Hmgs	3_prime_UTR_variant	5,383575743	Hmgs
X2R_12228554_SNP	4,13E-06	3	63	16	62	0,099640979	2R:16341049	Nup62	upstream_gene_variant	5,383575743
X2R_12228554_SNP	4,13E-06	3	63	16	62	0,099640979	2R:16341049	Vha44	upstream_gene_variant	5,383575743
X2R_12228554_SNP	4,13E-06	3	63	16	62	0,099640979	2R:16341049	wcd	downstream_gene_variant	5,383575743
X2R_11048920_SNP	4,23E-06	66	74	6	NA	0,099640979	2R:15161415	CR43831	upstream_gene_variant	5,373221555
X2R_11048920_SNP	4,23E-06	66	74	6	NA	0,099640979	2R:15161415	igl	intron_variant	5,373221555	igl
X2R_11048920_SNP	4,23E-06	66	74	6	NA	0,099640979	2R:15161415	igl	upstream_gene_variant	5,373221555
X2R_7466508_SNP	4,30E-06	20	44	33	43	0,099640979	2R:11579003	tou	3_prime_UTR_variant	5,366975357	tou
X2R_7466508_SNP	4,30E-06	20	44	33	43	0,099640979	2R:11579003	tou	downstream_gene_variant	5,366975357
X2L_12851328_SNP	4,33E-06	59	6	67	10	0,099640979	2L:12851328	-	intergenic_variant	5,363531462
X2R_10151602_SNP	4,35E-06	31	33	45	35	0,099640979	2R:14264097	beta4GalNAcTA	downstream_gene_variant	5,361812857
X2R_10151602_SNP	4,35E-06	31	33	45	35	0,099640979	2R:14264097	CG8547	intron_variant	5,361812857	CG8547
X2R_10151602_SNP	4,35E-06	31	33	45	35	0,099640979	2R:14264097	SelD	downstream_gene_variant	5,361812857
X2R_9217407_SNP	4,36E-06	54	12	64	12	0,099640979	2R:13329902	CR44206	non_coding_transcript_exon_variant	5,360070478	CR44206
X2R_9217407_SNP	4,36E-06	54	12	64	12	0,099640979	2R:13329902	mir-184	upstream_gene_variant	5,360070478
X2R_14523217_SNP	4,57E-06	33	32	47	32	0,103136136	2R:18635712	CG30122	intron_variant	5,339833369	CG30122
X2R_14523217_SNP	4,57E-06	33	32	47	32	0,103136136	2R:18635712	CG5482	upstream_gene_variant	5,339833369
X2R_14523217_SNP	4,57E-06	33	32	47	32	0,103136136	2R:18635712	CheA56a	upstream_gene_variant	5,339833369
X2R_14523217_SNP	4,57E-06	33	32	47	32	0,103136136	2R:18635712	tRNA:CR30227	upstream_gene_variant	5,339833369
X2R_14523217_SNP	4,57E-06	33	32	47	32	0,103136136	2R:18635712	tRNA:G3:55E	downstream_gene_variant	5,339833369
X2R_10720383_SNP	4,89E-06	11	54	14	65	0,107677471	2R:14832878	CG10205	5_prime_UTR_variant	5,31110974	CG10205
X2L_17945189_SNP	4,97E-06	4	60	12	62	0,107677471	2L:17945189	CR44397	downstream_gene_variant	5,303723749
X2L_17945189_SNP	4,97E-06	4	60	12	62	0,107677471	2L:17945189	CR44398	downstream_gene_variant	5,303723749
X2R_12225947_SNP	5,06E-06	33	32	52	25	0,107677471	2R:16338442	Hmgs	splice_region_variant,intron_variant	5,296169314	Hmgs
X2R_12225947_SNP	5,06E-06	33	32	52	25	0,107677471	2R:16338442	CG7997	downstream_gene_variant	5,296169314
X2R_12225947_SNP	5,06E-06	33	32	52	25	0,107677471	2R:16338442	Hmgs	intron_variant	5,296169314	Hmgs
X2R_12225947_SNP	5,06E-06	33	32	52	25	0,107677471	2R:16338442	Hmgs	upstream_gene_variant	5,296169314
X2R_12225947_SNP	5,06E-06	33	32	52	25	0,107677471	2R:16338442	Vha44	upstream_gene_variant	5,296169314
X2L_8389562_SNP	5,12E-06	42	20	52	23	0,107677471	2L:8389562	Acp29AB	downstream_gene_variant	5,290487428
X2L_8389562_SNP	5,12E-06	42	20	52	23	0,107677471	2L:8389562	CG13384	downstream_gene_variant	5,290487428
X2L_8389562_SNP	5,12E-06	42	20	52	23	0,107677471	2L:8389562	CG42819	upstream_gene_variant	5,290487428
X2L_8389562_SNP	5,12E-06	42	20	52	23	0,107677471	2L:8389562	CG42820	downstream_gene_variant	5,290487428
X2L_8389562_SNP	5,12E-06	42	20	52	23	0,107677471	2L:8389562	CR45343	upstream_gene_variant	5,290487428
X2L_8389562_SNP	5,12E-06	42	20	52	23	0,107677471	2L:8389562	lectin-29Ca	downstream_gene_variant	5,290487428
X2L_8389562_SNP	5,12E-06	42	20	52	23	0,107677471	2L:8389562	Peritrophin-15b	downstream_gene_variant	5,290487428
X2L_8389562_SNP	5,12E-06	42	20	52	23	0,107677471	2L:8389562	snRNA:U6atac:29B	upstream_gene_variant	5,290487428
X2L_9203455_SNP	5,14E-06	57	6	77	3	0,107677471	2L:9203455	tai	intron_variant	5,289176655	tai
X2R_10154275_SNP	5,18E-06	31	34	47	30	0,107677471	2R:14266770	CG8547	intron_variant	5,285504519	CG8547
X2R_10154275_SNP	5,18E-06	31	34	47	30	0,107677471	2R:14266770	conv	upstream_gene_variant	5,285504519
X2R_10154275_SNP	5,18E-06	31	34	47	30	0,107677471	2R:14266770	SelD	downstream_gene_variant	5,285504519
X2R_10688036_SNP	5,19E-06	63	4	75	5	0,107677471	2R:14800531	kn	intron_variant	5,285185158	kn
X2R_10688036_SNP	5,19E-06	63	4	75	5	0,107677471	2R:14800531	kn	upstream_gene_variant	5,285185158
X2R_10622249_SNP	5,23E-06	10	57	9	71	0,107677471	2R:14734744	CG12858	downstream_gene_variant	5,281156076
X2R_10622249_SNP	5,23E-06	10	57	9	71	0,107677471	2R:14734744	CR43428	downstream_gene_variant	5,281156076
X2L_8390046_SNP	5,39E-06	19	44	24	53	0,108642645	2L:8390046	Acp29AB	downstream_gene_variant	5,268334293
X2L_8390046_SNP	5,39E-06	19	44	24	53	0,108642645	2L:8390046	CG13384	downstream_gene_variant	5,268334293
X2L_8390046_SNP	5,39E-06	19	44	24	53	0,108642645	2L:8390046	CG42819	upstream_gene_variant	5,268334293
X2L_8390046_SNP	5,39E-06	19	44	24	53	0,108642645	2L:8390046	CG42820	3_prime_UTR_variant	5,268334293	CG42820
X2L_8390046_SNP	5,39E-06	19	44	24	53	0,108642645	2L:8390046	CR45343	upstream_gene_variant	5,268334293
X2L_8390046_SNP	5,39E-06	19	44	24	53	0,108642645	2L:8390046	lectin-29Ca	downstream_gene_variant	5,268334293
X2L_8390046_SNP	5,39E-06	19	44	24	53	0,108642645	2L:8390046	Peritrophin-15b	downstream_gene_variant	5,268334293
X2L_8390046_SNP	5,39E-06	19	44	24	53	0,108642645	2L:8390046	snRNA:U6atac:29B	downstream_gene_variant	5,268334293
X2R_15602677_SNP	5,47E-06	1	65	5	75	0,108642645	2R:19715172	CG8517	downstream_gene_variant	5,262209858
X2R_15602677_SNP	5,47E-06	1	65	5	75	0,108642645	2R:19715172	CR44509	upstream_gene_variant	5,262209858
X2R_15602677_SNP	5,47E-06	1	65	5	75	0,108642645	2R:19715172	Obp56e	downstream_gene_variant	5,262209858
X2R_15602677_SNP	5,47E-06	1	65	5	75	0,108642645	2R:19715172	Obp56f	downstream_gene_variant	5,262209858
X2R_15602677_SNP	5,47E-06	1	65	5	75	0,108642645	2R:19715172	tRNA:CR30215	upstream_gene_variant	5,262209858
X2L_12163226_INS	5,48E-06	8	55	9	56	0,108642645	2L:12163226	CG31760	intron_variant	5,26094041	CG31760
X2L_12163226_INS	5,48E-06	8	55	9	56	0,108642645	2L:12163226	CG31861	downstream_gene_variant	5,26094041
X2L_12163226_INS	5,48E-06	8	55	9	56	0,108642645	2L:12163226	ZnT33D	upstream_gene_variant	5,26094041
X2R_7475118_SNP	5,51E-06	59	6	68	10	0,108642645	2R:11587613	snoRNA:Psi28S-1180	downstream_gene_variant	5,258598379
X2R_7475118_SNP	5,51E-06	59	6	68	10	0,108642645	2R:11587613	snoRNA:Psi28S-1936	downstream_gene_variant	5,258598379
X2R_7475118_SNP	5,51E-06	59	6	68	10	0,108642645	2R:11587613	tou	intron_variant	5,258598379	tou
X2R_7475118_SNP	5,51E-06	59	6	68	10	0,108642645	2R:11587613	tou	upstream_gene_variant	5,258598379
X2L_9202535_SNP	5,58E-06	10	53	18	59	0,10872963	2L:9202535	tai	intron_variant	5,253703172	tai
X2L_9202516_SNP	5,66E-06	10	41	18	44	0,109189152	2L:9202516	tai	intron_variant	5,247229379	tai
X2L_5737537_SNP	5,72E-06	8	56	11	65	0,109189152	2L:5737537	CG11030	intron_variant	5,242916745	CG11030
X2L_5737537_SNP	5,72E-06	8	56	11	65	0,109189152	2L:5737537	CG11147	intron_variant	5,242916745	CG11147
X2R_10193310_SNP	5,93E-06	1	66	5	75	0,110583141	2R:14305805	Shroom	upstream_gene_variant	5,22701855
X2R_10193310_SNP	5,93E-06	1	66	5	75	0,110583141	2R:14305805	tej	upstream_gene_variant	5,22701855
X2R_10196252_SNP	5,93E-06	66	1	75	5	0,110583141	2R:14308747	Shroom	intron_variant	5,227018476	Shroom
X2R_10171323_SNP	5,97E-06	38	23	49	22	0,110583141	2R:14283818	Ih	intron_variant	5,224312019	Ih
X2R_10171323_SNP	5,97E-06	38	23	49	22	0,110583141	2R:14283818	Ih	upstream_gene_variant	5,224312019
X2R_10887304_SNP	6,10E-06	55	11	60	18	0,110935656	2R:14999799	CR43830	downstream_gene_variant	5,2145189
X2L_17088640_SNP	6,10E-06	5	60	3	74	0,110935656	2L:17088640	CG12620	3_prime_UTR_variant	5,214413936	CG12620
X2L_17088640_SNP	6,10E-06	5	60	3	74	0,110935656	2L:17088640	CR43819	downstream_gene_variant	5,214413936
X2R_10727458_SNP	6,40E-06	8	59	12	65	0,114175079	2R:14839953	NaPi-T	downstream_gene_variant	5,19384812
X2R_9217415_SNP	6,40E-06	19	47	25	51	0,114175079	2R:13329910	CR44206	non_coding_transcript_exon_variant	5,193561698	CR44206
X2R_9217415_SNP	6,40E-06	19	47	25	51	0,114175079	2R:13329910	mir-184	upstream_gene_variant	5,193561698
X2L_17941894_SNP	6,49E-06	3	63	11	66	0,114567866	2L:17941894	CR44399	upstream_gene_variant	5,187953625
X2L_9157287_SNP	6,66E-06	59	2	74	6	0,114638899	2L:9157287	CG32982	intron_variant	5,176756739	CG32982
X2L_2425087_SNP	6,72E-06	8	56	3	76	0,114638899	2L:2425087	CG44139	downstream_gene_variant	5,172686504
X2L_2425087_SNP	6,72E-06	8	56	3	76	0,114638899	2L:2425087	CG9886	downstream_gene_variant	5,172686504
X2L_2425087_SNP	6,72E-06	8	56	3	76	0,114638899	2L:2425087	CR44912	downstream_gene_variant	5,172686504
X2L_2425087_SNP	6,72E-06	8	56	3	76	0,114638899	2L:2425087	dpp	upstream_gene_variant	5,172686504
X3R_12910369_SNP	6,72E-06	26	34	31	43	0,114638899	3R:17084647	cal1	upstream_gene_variant	5,172331154
X3R_12910369_SNP	6,72E-06	26	34	31	43	0,114638899	3R:17084647	GckIII	upstream_gene_variant	5,172331154
X3R_12910369_SNP	6,72E-06	26	34	31	43	0,114638899	3R:17084647	Keap1	upstream_gene_variant	5,172331154
X3R_12910369_SNP	6,72E-06	26	34	31	43	0,114638899	3R:17084647	kuk	3_prime_UTR_variant	5,172331154	kuk
X2R_10543936_SNP	6,75E-06	12	35	28	37	0,114638899	2R:14656431	Adgf-E	downstream_gene_variant	5,170774085
X2R_10585346_SNP	6,80E-06	60	6	69	11	0,114638899	2R:14697841	mspo	intron_variant	5,167667332	mspo
X2R_14706544_SNP	7,24E-06	4	59	9	69	0,116446944	2R:18819039	CG15096	upstream_gene_variant	5,140030791
X2R_14706544_SNP	7,24E-06	4	59	9	69	0,116446944	2R:18819039	CG15097	downstream_gene_variant	5,140030791
X2R_14706544_SNP	7,24E-06	4	59	9	69	0,116446944	2R:18819039	CR43418	downstream_gene_variant	5,140030791
X2R_14706544_SNP	7,24E-06	4	59	9	69	0,116446944	2R:18819039	Phb2	upstream_gene_variant	5,140030791
X2R_17775947_SNP	7,25E-06	10	55	9	67	0,116446944	2R:21888442	Fili	intron_variant	5,139469329	Fili
X2R_9632088_INS	7,29E-06	6	58	19	55	0,116446944	2R:13744583	fas	intron_variant	5,137264072	fas
X2L_11336690_SNP	7,31E-06	53	10	55	20	0,116446944	2L:11336690	CR44584	upstream_gene_variant	5,136138592
X2L_11336690_SNP	7,31E-06	53	10	55	20	0,116446944	2L:11336690	CR44585	downstream_gene_variant	5,136138592
X2L_8389638_SNP	7,34E-06	40	23	51	28	0,116446944	2L:8389638	Acp29AB	downstream_gene_variant	5,134085723
X2L_8389638_SNP	7,34E-06	40	23	51	28	0,116446944	2L:8389638	CG13384	downstream_gene_variant	5,134085723
X2L_8389638_SNP	7,34E-06	40	23	51	28	0,116446944	2L:8389638	CG42819	upstream_gene_variant	5,134085723
X2L_8389638_SNP	7,34E-06	40	23	51	28	0,116446944	2L:8389638	CG42820	downstream_gene_variant	5,134085723
X2L_8389638_SNP	7,34E-06	40	23	51	28	0,116446944	2L:8389638	CR45343	upstream_gene_variant	5,134085723
X2L_8389638_SNP	7,34E-06	40	23	51	28	0,116446944	2L:8389638	lectin-29Ca	downstream_gene_variant	5,134085723
X2L_8389638_SNP	7,34E-06	40	23	51	28	0,116446944	2L:8389638	Peritrophin-15b	downstream_gene_variant	5,134085723
X2L_8389638_SNP	7,34E-06	40	23	51	28	0,116446944	2L:8389638	snRNA:U6atac:29B	upstream_gene_variant	5,134085723
X2R_10676540_SNP	7,37E-06	62	5	74	6	0,116446944	2R:14789035	kn	intron_variant	5,132276607	kn
X2L_17943201_SNP	7,53E-06	64	2	67	9	0,116446944	2L:17943201	CR44398	downstream_gene_variant	5,123268587
X2L_17943201_SNP	7,53E-06	64	2	67	9	0,116446944	2L:17943201	CR44399	upstream_gene_variant	5,123268587
X2R_10153763_SNP	7,57E-06	26	31	41	27	0,116446944	2R:14266258	CG8547	intron_variant	5,120798686	CG8547
X2R_10153763_SNP	7,57E-06	26	31	41	27	0,116446944	2R:14266258	conv	upstream_gene_variant	5,120798686
X2R_10153763_SNP	7,57E-06	26	31	41	27	0,116446944	2R:14266258	SelD	downstream_gene_variant	5,120798686
X3R_7862134_SNP	7,58E-06	54	9	59	15	0,116446944	3R:12036412	CG14736	upstream_gene_variant	5,120547308
X3R_7862134_SNP	7,58E-06	54	9	59	15	0,116446944	3R:12036412	CG31358	upstream_gene_variant	5,120547308
X3R_7862134_SNP	7,58E-06	54	9	59	15	0,116446944	3R:12036412	CG42504	upstream_gene_variant	5,120547308
X3R_7862134_SNP	7,58E-06	54	9	59	15	0,116446944	3R:12036412	CG42505	upstream_gene_variant	5,120547308
X3R_7862134_SNP	7,58E-06	54	9	59	15	0,116446944	3R:12036412	ssp5	downstream_gene_variant	5,120547308
X_2876744_SNP	7,58E-06	62	5	76	3	0,116446944	X:2982711	kirre	intron_variant	5,120516412	kirre
X2R_10540199_SNP	7,59E-06	61	6	73	6	0,116446944	2R:14652694	Adgf-E	downstream_gene_variant	5,11983439
X2R_7040222_SNP	7,76E-06	57	10	61	17	0,117122438	2R:11152717	CG12391	upstream_gene_variant	5,110296355
X2R_7040222_SNP	7,76E-06	57	10	61	17	0,117122438	2R:11152717	CG13229	intron_variant	5,110296355	CG13229
X2R_7040222_SNP	7,76E-06	57	10	61	17	0,117122438	2R:11152717	CG13230	upstream_gene_variant	5,110296355
X2L_4374910_SNP	7,76E-06	34	27	32	43	0,117122438	2L:4374910	Traf4	intron_variant	5,110260525	Traf4
X2R_13758104_DEL	7,83E-06	63	1	72	5	0,117316429	2R:17870599	CR44417	downstream_gene_variant	5,106053466
X2R_13758104_DEL	7,83E-06	63	1	72	5	0,117316429	2R:17870599	Elk	upstream_gene_variant	5,106053466
X2R_13758104_DEL	7,83E-06	63	1	72	5	0,117316429	2R:17870599	Mapmodulin	intron_variant	5,106053466	Mapmodulin
X2R_13758104_DEL	7,83E-06	63	1	72	5	0,117316429	2R:17870599	thr	upstream_gene_variant	5,106053466
X2L_4924679_SNP	8,27E-06	39	25	38	41	0,122936525	2L:4924679	hoe1	intron_variant	5,082270836	hoe1
X2L_2425224_SNP	8,35E-06	59	6	73	6	0,123120611	2L:2425224	CG44139	downstream_gene_variant	5,078187831
X2L_2425224_SNP	8,35E-06	59	6	73	6	0,123120611	2L:2425224	CG9886	downstream_gene_variant	5,078187831
X2L_2425224_SNP	8,35E-06	59	6	73	6	0,123120611	2L:2425224	CR44912	downstream_gene_variant	5,078187831
X2L_2425224_SNP	8,35E-06	59	6	73	6	0,123120611	2L:2425224	dpp	upstream_gene_variant	5,078187831
X2R_1607429_SNP	8,46E-06	2	64	5	75	0,123206115	2R:5719924	ap	intron_variant	5,072758866	ap
X2R_10585596_SNP	8,49E-06	62	4	71	6	0,123206115	2R:14698091	mspo	intron_variant	5,071100341	mspo
X2R_8907358_SNP	8,62E-06	60	6	60	19	0,123402733	2R:13019853	-	intergenic_variant	5,06464804
X2R_14520318_SNP	8,64E-06	8	58	13	65	0,123402733	2R:18632813	CG30122	3_prime_UTR_variant	5,063726241	CG30122
X2R_14520318_SNP	8,64E-06	8	58	13	65	0,123402733	2R:18632813	CG5482	upstream_gene_variant	5,063726241
X2R_14520318_SNP	8,64E-06	8	58	13	65	0,123402733	2R:18632813	Eip55E	downstream_gene_variant	5,063726241
X2L_17937494_SNP	8,71E-06	63	1	67	10	0,123587731	2L:17937494	CR44399	downstream_gene_variant	5,059773025
X_21217582_SNP	8,83E-06	59	6	72	8	0,124220708	X:21346555	dod	3_prime_UTR_variant	5,054276674	dod
X_21217582_SNP	8,83E-06	59	6	72	8	0,124220708	X:21346555	fliI	downstream_gene_variant	5,054276674
X_21217582_SNP	8,83E-06	59	6	72	8	0,124220708	X:21346555	pen	3_prime_UTR_variant	5,054276674	pen
X_21217582_SNP	8,83E-06	59	6	72	8	0,124220708	X:21346555	sol	upstream_gene_variant	5,054276674
X2L_4924664_SNP	9,10E-06	24	39	36	41	0,127081027	2L:4924664	hoe1	intron_variant	5,0411368	hoe1
X2R_10585592_SNP	9,46E-06	4	62	6	70	0,12873101	2R:14698087	mspo	intron_variant	5,024150918	mspo
X2R_10886115_SNP	9,55E-06	7	16	7	18	0,12873101	2R:14998610	CG10265	upstream_gene_variant	5,019877589
X2R_10886115_SNP	9,55E-06	7	16	7	18	0,12873101	2R:14998610	CR43830	downstream_gene_variant	5,019877589
X2R_10886118_SNP	9,55E-06	16	7	18	7	0,12873101	2R:14998613	CG10265	upstream_gene_variant	5,019877589
X2R_10886118_SNP	9,55E-06	16	7	18	7	0,12873101	2R:14998613	CR43830	downstream_gene_variant	5,019877589
X2L_8389560_SNP	9,58E-06	20	42	26	52	0,12873101	2L:8389560	Acp29AB	downstream_gene_variant	5,01846978
X2L_8389560_SNP	9,58E-06	20	42	26	52	0,12873101	2L:8389560	CG13384	downstream_gene_variant	5,01846978
X2L_8389560_SNP	9,58E-06	20	42	26	52	0,12873101	2L:8389560	CG42819	upstream_gene_variant	5,01846978
X2L_8389560_SNP	9,58E-06	20	42	26	52	0,12873101	2L:8389560	CG42820	downstream_gene_variant	5,01846978
X2L_8389560_SNP	9,58E-06	20	42	26	52	0,12873101	2L:8389560	CR45343	upstream_gene_variant	5,01846978
X2L_8389560_SNP	9,58E-06	20	42	26	52	0,12873101	2L:8389560	lectin-29Ca	downstream_gene_variant	5,01846978
X2L_8389560_SNP	9,58E-06	20	42	26	52	0,12873101	2L:8389560	Peritrophin-15b	downstream_gene_variant	5,01846978
X2L_8389560_SNP	9,58E-06	20	42	26	52	0,12873101	2L:8389560	snRNA:U6atac:29B	upstream_gene_variant	5,01846978
X2R_10622250_SNP	9,59E-06	51	16	65	15	0,12873101	2R:14734745	CG12858	downstream_gene_variant	5,018292041
X2R_10622250_SNP	9,59E-06	51	16	65	15	0,12873101	2R:14734745	CR43428	downstream_gene_variant	5,018292041
X2R_10622258_SNP	9,63E-06	16	51	15	65	0,12873101	2R:14734753	CG12858	downstream_gene_variant	5,016511103
X2R_10622258_SNP	9,63E-06	16	51	15	65	0,12873101	2R:14734753	CR43428	downstream_gene_variant	5,016511103
X2L_12049670_SNP	9,76E-06	11	53	16	60	0,128806039	2L:12049670	CG14945	5_prime_UTR_variant	5,010578528	CG14945
X2L_12049670_SNP	9,76E-06	11	53	16	60	0,128806039	2L:12049670	CG14945	upstream_gene_variant	5,010578528
X2L_12049670_SNP	9,76E-06	11	53	16	60	0,128806039	2L:12049670	CG6770	upstream_gene_variant	5,010578528
X2L_12049670_SNP	9,76E-06	11	53	16	60	0,128806039	2L:12049670	CG6785	upstream_gene_variant	5,010578528
X2L_12049670_SNP	9,76E-06	11	53	16	60	0,128806039	2L:12049670	CR44589	downstream_gene_variant	5,010578528
X2L_12049670_SNP	9,76E-06	11	53	16	60	0,128806039	2L:12049670	JhI-21	downstream_gene_variant	5,010578528
X2L_12049670_SNP	9,76E-06	11	53	16	60	0,128806039	2L:12049670	Plzf	upstream_gene_variant	5,010578528
X3L_9799208_SNP	9,77E-06	16	48	20	57	0,128806039	3L:9806108	CG32052	intron_variant	5,010097746	CG32052
X3L_9799208_SNP	9,77E-06	16	48	20	57	0,128806039	3L:9806108	Ilp3	upstream_gene_variant	5,010097746
X3L_9799208_SNP	9,77E-06	16	48	20	57	0,128806039	3L:9806108	Ilp4	upstream_gene_variant	5,010097746
X2R_15595811_SNP	1,02E-05	2	65	6	73	0,131854961	2R:19708306	CR44509	downstream_gene_variant	4,992707232
X2R_15595811_SNP	1,02E-05	2	65	6	73	0,131854961	2R:19708306	Obp56d	upstream_gene_variant	4,992707232
X2R_15595811_SNP	1,02E-05	2	65	6	73	0,131854961	2R:19708306	Obp56e	upstream_gene_variant	4,992707232
X2L_17045590_SNP	1,02E-05	36	27	48	28	0,131854961	2L:17045590	CG15136	downstream_gene_variant	4,990885792
X2L_17045590_SNP	1,02E-05	36	27	48	28	0,131854961	2L:17045590	CR43802	upstream_gene_variant	4,990885792
X_11164117_SNP	1,03E-05	3	64	7	73	0,131854961	X:11270084	CG44422	intron_variant	4,988463811	CG44422
X2L_10121863_SNP	1,03E-05	54	7	67	8	0,131854961	2L:10121863	CG13135	downstream_gene_variant	4,987872984
X2L_10121863_SNP	1,03E-05	54	7	67	8	0,131854961	2L:10121863	CG34109	intron_variant	4,987872984	CG34109
X2L_10121863_SNP	1,03E-05	54	7	67	8	0,131854961	2L:10121863	CG44153	intron_variant	4,987872984	CG44153
X2R_7893285_SNP	1,04E-05	66	75	5	NA	0,132001949	2R:12005780	otk	synonymous_variant	4,981893943	otk
X3R_25476202_SNP	1,05E-05	2	61	5	73	0,132001949	3R:29650480	Dop1R2	intron_variant	4,98036868	Dop1R2
X2L_5029837_SNP	1,07E-05	50	13	60	16	0,132001949	2L:5029837	Cg25C	intron_variant	4,970289204	Cg25C
X2L_5029837_SNP	1,07E-05	50	13	60	16	0,132001949	2L:5029837	vkg	upstream_gene_variant	4,970289204
X2R_14706680_SNP	1,07E-05	21	45	26	45	0,132001949	2R:18819175	CG15096	upstream_gene_variant	4,96960027
X2R_14706680_SNP	1,07E-05	21	45	26	45	0,132001949	2R:18819175	CG15097	downstream_gene_variant	4,96960027
X2R_14706680_SNP	1,07E-05	21	45	26	45	0,132001949	2R:18819175	CR43418	downstream_gene_variant	4,96960027
X2R_14706680_SNP	1,07E-05	21	45	26	45	0,132001949	2R:18819175	Phb2	upstream_gene_variant	4,96960027
X2R_10154268_SNP	1,08E-05	32	33	30	47	0,132001949	2R:14266763	CG8547	intron_variant	4,967117439	CG8547
X2R_10154268_SNP	1,08E-05	32	33	30	47	0,132001949	2R:14266763	conv	upstream_gene_variant	4,967117439
X2R_10154268_SNP	1,08E-05	32	33	30	47	0,132001949	2R:14266763	SelD	downstream_gene_variant	4,967117439
X2L_9202513_SNP	1,08E-05	40	10	42	18	0,132001949	2L:9202513	tai	intron_variant	4,965052857	tai
X2L_17923262_SNP	1,09E-05	2	60	7	68	0,132001949	2L:17923262	CR43274	upstream_gene_variant	4,96419297
X2R_7893240_SNP	1,10E-05	65	5	75	NA	0,132001949	2R:12005735	otk	synonymous_variant	4,95958637	otk
X2R_7466905_SNP	1,11E-05	8	58	12	64	0,132001949	2R:11579400	tou	3_prime_UTR_variant	4,956487612	tou
X2R_7466905_SNP	1,11E-05	8	58	12	64	0,132001949	2R:11579400	tou	downstream_gene_variant	4,956487612
X2L_14410113_SNP	1,11E-05	4	54	6	68	0,132001949	2L:14410113	CR44733	downstream_gene_variant	4,955038301
X2L_14410113_SNP	1,11E-05	4	54	6	68	0,132001949	2L:14410113	elB	upstream_gene_variant	4,955038301
X2R_10900366_SNP	1,11E-05	1	65	5	75	0,132001949	2R:15012861	CG43101	downstream_gene_variant	4,953700761
X2R_10900366_SNP	1,11E-05	1	65	5	75	0,132001949	2R:15012861	hbs	intron_variant	4,953700761	hbs
X2R_4104626_SNP	1,12E-05	54	11	64	14	0,132001949	2R:8217121	LRP1	synonymous_variant	4,952093042	LRP1
X2R_10507866_SNP	1,12E-05	13	54	20	58	0,132001949	2R:14620361	CG12863	synonymous_variant	4,948865236	CG12863
X2R_10507866_SNP	1,12E-05	13	54	20	58	0,132001949	2R:14620361	Sec61beta	downstream_gene_variant	4,948865236
X2R_10507866_SNP	1,12E-05	13	54	20	58	0,132001949	2R:14620361	snoRNA:Me18S-A1061	upstream_gene_variant	4,948865236
X2R_10507866_SNP	1,12E-05	13	54	20	58	0,132001949	2R:14620361	snoRNA:Me18S-C1366	upstream_gene_variant	4,948865236
X2R_10507866_SNP	1,12E-05	13	54	20	58	0,132001949	2R:14620361	snoRNA:Me18S-G1952	upstream_gene_variant	4,948865236
X2R_10507866_SNP	1,12E-05	13	54	20	58	0,132001949	2R:14620361	snoRNA:Me28S-A992	upstream_gene_variant	4,948865236
X2R_10507866_SNP	1,12E-05	13	54	20	58	0,132001949	2R:14620361	snoRNA:Me28S-C3227a	upstream_gene_variant	4,948865236
X2R_10507866_SNP	1,12E-05	13	54	20	58	0,132001949	2R:14620361	snoRNA:Me28S-C3227b	upstream_gene_variant	4,948865236
X2R_10507866_SNP	1,12E-05	13	54	20	58	0,132001949	2R:14620361	snoRNA:Me28S-G2703a	upstream_gene_variant	4,948865236
X2R_10507866_SNP	1,12E-05	13	54	20	58	0,132001949	2R:14620361	snoRNA:Me28S-G2703b	upstream_gene_variant	4,948865236
X2R_10507866_SNP	1,12E-05	13	54	20	58	0,132001949	2R:14620361	snoRNA:Me28S-G2703c	upstream_gene_variant	4,948865236
X2R_10507866_SNP	1,12E-05	13	54	20	58	0,132001949	2R:14620361	snoRNA:Me28S-U1848	upstream_gene_variant	4,948865236
X2R_10507866_SNP	1,12E-05	13	54	20	58	0,132001949	2R:14620361	snoRNA:Or-CD4	upstream_gene_variant	4,948865236
X2R_10507866_SNP	1,12E-05	13	54	20	58	0,132001949	2R:14620361	Su(var)2-HP2	upstream_gene_variant	4,948865236
X2R_10507866_SNP	1,12E-05	13	54	20	58	0,132001949	2R:14620361	Uhg5	upstream_gene_variant	4,948865236
X2R_17775929_SNP	1,13E-05	9	56	10	68	0,132001949	2R:21888424	Fili	intron_variant	4,947621989	Fili
X2L_17941901_DEL	1,16E-05	63	3	66	9	0,134359931	2L:17941901	CR44399	upstream_gene_variant	4,937226668
X2R_10725026_SNP	1,17E-05	8	58	11	69	0,135674763	2R:14837521	CG10205	downstream_gene_variant	4,930308228
X2R_10104502_SNP	1,20E-05	10	55	17	56	0,137766164	2R:14216997	CG8468	upstream_gene_variant	4,920992144
X2R_10104502_SNP	1,20E-05	10	55	17	56	0,137766164	2R:14216997	mir-308	upstream_gene_variant	4,920992144
X2R_10104502_SNP	1,20E-05	10	55	17	56	0,137766164	2R:14216997	RpS23	upstream_gene_variant	4,920992144
X2R_10104502_SNP	1,20E-05	10	55	17	56	0,137766164	2R:14216997	Sox15	upstream_gene_variant	4,920992144
X2L_9202515_SNP	1,22E-05	10	41	17	44	0,139024444	2L:9202515	tai	intron_variant	4,9143873	tai
X2L_3271738_SNP	1,23E-05	35	23	43	33	0,140093313	2L:3271738	CG3332	downstream_gene_variant	4,908420965
X2L_3271738_SNP	1,23E-05	35	23	43	33	0,140093313	2L:3271738	CG3347	3_prime_UTR_variant	4,908420965	CG3347
X2L_3271738_SNP	1,23E-05	35	23	43	33	0,140093313	2L:3271738	CR44484	downstream_gene_variant	4,908420965
X2R_7475262_SNP	1,24E-05	6	58	10	66	0,140223869	2R:11587757	snoRNA:Psi28S-1180	downstream_gene_variant	4,90539228
X2R_7475262_SNP	1,24E-05	6	58	10	66	0,140223869	2R:11587757	snoRNA:Psi28S-1936	downstream_gene_variant	4,90539228
X2R_7475262_SNP	1,24E-05	6	58	10	66	0,140223869	2R:11587757	tou	intron_variant	4,90539228	tou
X2L_8034210_SNP	1,25E-05	60	3	70	6	0,140289077	2L:8034210	baf	downstream_gene_variant	4,902581986
X2L_8034210_SNP	1,25E-05	60	3	70	6	0,140289077	2L:8034210	CG7367	intron_variant	4,902581986	CG7367
X2L_8034210_SNP	1,25E-05	60	3	70	6	0,140289077	2L:8034210	Cka	intron_variant	4,902581986	Cka
X2R_16245315_SNP	1,26E-05	20	45	42	36	0,140604344	2R:20357810	CG11192	upstream_gene_variant	4,899014296
X2L_8390049_SNP	1,28E-05	43	20	51	24	0,142074127	2L:8390049	Acp29AB	downstream_gene_variant	4,891920616
X2L_8390049_SNP	1,28E-05	43	20	51	24	0,142074127	2L:8390049	CG13384	downstream_gene_variant	4,891920616
X2L_8390049_SNP	1,28E-05	43	20	51	24	0,142074127	2L:8390049	CG42819	upstream_gene_variant	4,891920616
X2L_8390049_SNP	1,28E-05	43	20	51	24	0,142074127	2L:8390049	CG42820	3_prime_UTR_variant	4,891920616	CG42820
X2L_8390049_SNP	1,28E-05	43	20	51	24	0,142074127	2L:8390049	CR45343	upstream_gene_variant	4,891920616
X2L_8390049_SNP	1,28E-05	43	20	51	24	0,142074127	2L:8390049	lectin-29Ca	downstream_gene_variant	4,891920616
X2L_8390049_SNP	1,28E-05	43	20	51	24	0,142074127	2L:8390049	Peritrophin-15b	downstream_gene_variant	4,891920616
X2L_8390049_SNP	1,28E-05	43	20	51	24	0,142074127	2L:8390049	snRNA:U6atac:29B	downstream_gene_variant	4,891920616
X2L_3272656_INS	1,31E-05	27	27	35	39	0,144307161	2L:3272656	CG3332	downstream_gene_variant	4,88258551
X2L_3272656_INS	1,31E-05	27	27	35	39	0,144307161	2L:3272656	CG3347	downstream_gene_variant	4,88258551
X2L_3272656_INS	1,31E-05	27	27	35	39	0,144307161	2L:3272656	CR44484	downstream_gene_variant	4,88258551
X2R_10836673_SNP	1,34E-05	16	50	13	65	0,14687021	2R:14949168	aPKC	intron_variant	4,872392489	aPKC
X2R_10836673_SNP	1,34E-05	16	50	13	65	0,14687021	2R:14949168	CG10257	downstream_gene_variant	4,872392489
X3L_12420872_SNP	1,35E-05	4	63	8	70	0,14718527	3L:12427772	toe	synonymous_variant	4,868929521	toe
X2R_11948429_SNP	1,37E-05	4	62	6	73	0,147384302	2R:16060924	CG8405	downstream_gene_variant	4,862081546
X2R_11948429_SNP	1,37E-05	4	62	6	73	0,147384302	2R:16060924	mir-137	downstream_gene_variant	4,862081546
X2R_14527917_SNP	1,38E-05	21	43	29	48	0,147384302	2R:18640412	CheA56a	synonymous_variant	4,859428483	CheA56a
X2R_14527917_SNP	1,38E-05	21	43	29	48	0,147384302	2R:18640412	CG30122	upstream_gene_variant	4,859428483
X2R_14527917_SNP	1,38E-05	21	43	29	48	0,147384302	2R:18640412	SP2637	downstream_gene_variant	4,859428483
X2R_14527917_SNP	1,38E-05	21	43	29	48	0,147384302	2R:18640412	tRNA:CR30227	downstream_gene_variant	4,859428483
X2R_14527917_SNP	1,38E-05	21	43	29	48	0,147384302	2R:18640412	tRNA:G3:55E	upstream_gene_variant	4,859428483
X3R_25403277_SNP	1,39E-05	51	12	56	16	0,147384302	3R:29577555	-	intergenic_variant	4,857983662
X2L_18204782_SNP	1,39E-05	6	56	9	63	0,147384302	2L:18204782	CG42750	synonymous_variant	4,855798293	CG42750
X2L_18204782_SNP	1,39E-05	6	56	9	63	0,147384302	2L:18204782	CG31802	downstream_gene_variant	4,855798293
X2L_18204782_SNP	1,39E-05	6	56	9	63	0,147384302	2L:18204782	CR43413	downstream_gene_variant	4,855798293
X2L_17924068_SNP	1,40E-05	65	1	67	8	0,147384302	2L:17924068	CR43274	upstream_gene_variant	4,852820385
X2L_19913184_SNP	1,41E-05	51	13	64	12	0,147384302	2L:19913184	Victoria	synonymous_variant	4,851465518	Victoria
X2L_19913184_SNP	1,41E-05	51	13	64	12	0,147384302	2L:19913184	CR43097	upstream_gene_variant	4,851465518
X2L_19913184_SNP	1,41E-05	51	13	64	12	0,147384302	2L:19913184	sick	intron_variant	4,851465518	sick
X2L_19913184_SNP	1,41E-05	51	13	64	12	0,147384302	2L:19913184	sick	upstream_gene_variant	4,851465518
X2L_19913184_SNP	1,41E-05	51	13	64	12	0,147384302	2L:19913184	TotF	upstream_gene_variant	4,851465518
X2R_10622349_SNP	1,41E-05	47	20	57	20	0,147384302	2R:14734844	CG12858	downstream_gene_variant	4,849908248
X2R_10622349_SNP	1,41E-05	47	20	57	20	0,147384302	2R:14734844	CR43428	downstream_gene_variant	4,849908248
X2R_6061816_SNP	1,42E-05	31	35	33	40	0,147384302	2R:10174311	KCNQ	intron_variant	4,848598583	KCNQ
X2L_13705386_SNP	1,45E-05	58	7	71	7	0,149496557	2L:13705386	CG31814	intron_variant	4,840012551	CG31814
X2L_13705386_SNP	1,45E-05	58	7	71	7	0,149496557	2L:13705386	CG7311	upstream_gene_variant	4,840012551
X2R_14706594_DEL	1,46E-05	30	36	30	47	0,149872141	2R:18819089	CG15096	upstream_gene_variant	4,836530016
X2R_14706594_DEL	1,46E-05	30	36	30	47	0,149872141	2R:18819089	CG15097	downstream_gene_variant	4,836530016
X2R_14706594_DEL	1,46E-05	30	36	30	47	0,149872141	2R:18819089	CR43418	downstream_gene_variant	4,836530016
X2R_14706594_DEL	1,46E-05	30	36	30	47	0,149872141	2R:18819089	Phb2	upstream_gene_variant	4,836530016
X2R_14706884_SNP	1,48E-05	4	61	8	71	0,151842247	2R:18819379	CG15096	upstream_gene_variant	4,828478605
X2R_14706884_SNP	1,48E-05	4	61	8	71	0,151842247	2R:18819379	CG15097	downstream_gene_variant	4,828478605
X2R_14706884_SNP	1,48E-05	4	61	8	71	0,151842247	2R:18819379	CR43418	downstream_gene_variant	4,828478605
X2R_14706884_SNP	1,48E-05	4	61	8	71	0,151842247	2R:18819379	Phb2	upstream_gene_variant	4,828478605
X2L_8389640_SNP	1,50E-05	22	39	27	51	0,152321566	2L:8389640	Acp29AB	downstream_gene_variant	4,824743098
X2L_8389640_SNP	1,50E-05	22	39	27	51	0,152321566	2L:8389640	CG13384	downstream_gene_variant	4,824743098
X2L_8389640_SNP	1,50E-05	22	39	27	51	0,152321566	2L:8389640	CG42819	upstream_gene_variant	4,824743098
X2L_8389640_SNP	1,50E-05	22	39	27	51	0,152321566	2L:8389640	CG42820	downstream_gene_variant	4,824743098
X2L_8389640_SNP	1,50E-05	22	39	27	51	0,152321566	2L:8389640	CR45343	upstream_gene_variant	4,824743098
X2L_8389640_SNP	1,50E-05	22	39	27	51	0,152321566	2L:8389640	lectin-29Ca	downstream_gene_variant	4,824743098
X2L_8389640_SNP	1,50E-05	22	39	27	51	0,152321566	2L:8389640	Peritrophin-15b	downstream_gene_variant	4,824743098
X2L_8389640_SNP	1,50E-05	22	39	27	51	0,152321566	2L:8389640	snRNA:U6atac:29B	upstream_gene_variant	4,824743098
X2R_10886043_SNP	1,53E-05	6	17	6	19	0,154427337	2R:14998538	CG10265	upstream_gene_variant	4,816282992
X2R_10886043_SNP	1,53E-05	6	17	6	19	0,154427337	2R:14998538	CR43830	downstream_gene_variant	4,816282992
X2R_6753775_SNP	1,54E-05	54	13	68	11	0,154427337	2R:10866270	CG30015	intron_variant	4,812482663	CG30015
X2R_6753775_SNP	1,54E-05	54	13	68	11	0,154427337	2R:10866270	CG30015	upstream_gene_variant	4,812482663
X2L_19912447_SNP	1,54E-05	16	48	13	62	0,154427337	2L:19912447	CR43097	upstream_gene_variant	4,811756527
X2L_19912447_SNP	1,54E-05	16	48	13	62	0,154427337	2L:19912447	sick	intron_variant	4,811756527	sick
X2L_19912447_SNP	1,54E-05	16	48	13	62	0,154427337	2L:19912447	TotF	upstream_gene_variant	4,811756527
X2L_19912447_SNP	1,54E-05	16	48	13	62	0,154427337	2L:19912447	Victoria	downstream_gene_variant	4,811756527
X3R_22998390_SNP	1,58E-05	38	12	38	18	0,156742265	3R:27172668	Ser	3_prime_UTR_variant	4,801489443	Ser
X2R_6594503_SNP	1,59E-05	60	7	72	5	0,156742265	2R:10706998	stan	synonymous_variant	4,799969363	stan
X2R_10411726_SNP	1,60E-05	1	65	5	74	0,156742265	2R:14524221	ttv	upstream_gene_variant	4,795646104
X_13414306_SNP	1,60E-05	6	60	6	72	0,156742265	X:13520273	Neto	downstream_gene_variant	4,795443771
X_13414306_SNP	1,60E-05	6	60	6	72	0,156742265	X:13520273	Neto	intron_variant	4,795443771	Neto
X_14670839_SNP	1,62E-05	62	5	77	2	0,156742265	X:14776806	CG5334	downstream_gene_variant	4,791077048
X_14670839_SNP	1,62E-05	62	5	77	2	0,156742265	X:14776806	CG5347	5_prime_UTR_variant	4,791077048	CG5347
X2R_10633983_SNP	1,63E-05	5	62	4	76	0,156742265	2R:14746478	AttA	upstream_gene_variant	4,788643946
X2R_10633983_SNP	1,63E-05	5	62	4	76	0,156742265	2R:14746478	AttB	upstream_gene_variant	4,788643946
X2R_10633983_SNP	1,63E-05	5	62	4	76	0,156742265	2R:14746478	CG12858	upstream_gene_variant	4,788643946
X2R_10633983_SNP	1,63E-05	5	62	4	76	0,156742265	2R:14746478	Dro	3_prime_UTR_variant	4,788643946	Dro
X2R_10633983_SNP	1,63E-05	5	62	4	76	0,156742265	2R:14746478	Dro	downstream_gene_variant	4,788643946
X2R_10633983_SNP	1,63E-05	5	62	4	76	0,156742265	2R:14746478	Rpn6	downstream_gene_variant	4,788643946
X3L_3931917_SNP	1,63E-05	31	34	50	26	0,156742265	3L:3931917	CG10866	downstream_gene_variant	4,788425903
X3L_3931917_SNP	1,63E-05	31	34	50	26	0,156742265	3L:3931917	Eip63F-1	intron_variant	4,788425903	Eip63F-1
X3L_3931917_SNP	1,63E-05	31	34	50	26	0,156742265	3L:3931917	Eip63F-1	upstream_gene_variant	4,788425903
X3L_3931917_SNP	1,63E-05	31	34	50	26	0,156742265	3L:3931917	Eip63F-2	upstream_gene_variant	4,788425903
X3R_25403544_SNP	1,63E-05	20	42	27	51	0,156742265	3R:29577822	-	intergenic_variant	4,787101587
X2R_10454725_DEL	1,64E-05	2	63	6	71	0,156777779	2R:14567220	LamC	downstream_gene_variant	4,784749853
X2R_10454725_DEL	1,64E-05	2	63	6	71	0,156777779	2R:14567220	ttv	intron_variant	4,784749853	ttv
X2R_14525150_SNP	1,66E-05	27	39	34	42	0,156777779	2R:18637645	CG30122	synonymous_variant	4,779952351	CG30122
X2R_14525150_SNP	1,66E-05	27	39	34	42	0,156777779	2R:18637645	CheA56a	upstream_gene_variant	4,779952351
X2R_14525150_SNP	1,66E-05	27	39	34	42	0,156777779	2R:18637645	SP2637	downstream_gene_variant	4,779952351
X2R_14525150_SNP	1,66E-05	27	39	34	42	0,156777779	2R:18637645	tRNA:CR30227	upstream_gene_variant	4,779952351
X2R_14525150_SNP	1,66E-05	27	39	34	42	0,156777779	2R:18637645	tRNA:G3:55E	downstream_gene_variant	4,779952351
X2R_14015281_SNP	1,67E-05	62	2	69	8	0,156777779	2R:18127776	Dip3	upstream_gene_variant	4,77614286
X2R_14015281_SNP	1,67E-05	62	2	69	8	0,156777779	2R:18127776	Hsf	downstream_gene_variant	4,77614286
X2R_14015281_SNP	1,67E-05	62	2	69	8	0,156777779	2R:18127776	Spn55B	intron_variant	4,77614286	Spn55B
X2R_14015281_SNP	1,67E-05	62	2	69	8	0,156777779	2R:18127776	stau	upstream_gene_variant	4,77614286
X2R_11872902_SNP	1,68E-05	56	11	71	9	0,156777779	2R:15985397	CG8314	downstream_gene_variant	4,775349898
X2R_11872902_SNP	1,68E-05	56	11	71	9	0,156777779	2R:15985397	CR45021	upstream_gene_variant	4,775349898
X2R_11872902_SNP	1,68E-05	56	11	71	9	0,156777779	2R:15985397	Strn-Mlck	intron_variant	4,775349898	Strn-Mlck
X2R_10676788_SNP	1,68E-05	64	3	70	9	0,156777779	2R:14789283	kn	intron_variant	4,774961979	kn
X3R_25223305_SNP	1,70E-05	6	61	4	75	0,156777779	3R:29397583	Ptp99A	intron_variant	4,76989175	Ptp99A
X2R_10572638_SNP	1,70E-05	57	9	63	12	0,156777779	2R:14685133	mspo	intron_variant	4,7690777	mspo
X2L_5737536_SNP	1,71E-05	57	9	65	11	0,156777779	2L:5737536	CG11030	intron_variant	4,768087675	CG11030
X2L_5737536_SNP	1,71E-05	57	9	65	11	0,156777779	2L:5737536	CG11147	intron_variant	4,768087675	CG11147
X2R_14525129_SNP	1,71E-05	28	38	35	42	0,156777779	2R:18637624	CG30122	synonymous_variant	4,767407641	CG30122
X2R_14525129_SNP	1,71E-05	28	38	35	42	0,156777779	2R:18637624	CheA56a	upstream_gene_variant	4,767407641
X2R_14525129_SNP	1,71E-05	28	38	35	42	0,156777779	2R:18637624	SP2637	downstream_gene_variant	4,767407641
X2R_14525129_SNP	1,71E-05	28	38	35	42	0,156777779	2R:18637624	tRNA:CR30227	upstream_gene_variant	4,767407641
X2R_14525129_SNP	1,71E-05	28	38	35	42	0,156777779	2R:18637624	tRNA:G3:55E	downstream_gene_variant	4,767407641
X2R_10508086_SNP	1,72E-05	11	56	21	56	0,156955346	2R:14620581	CG12863	intron_variant	4,764792342	CG12863
X2R_10508086_SNP	1,72E-05	11	56	21	56	0,156955346	2R:14620581	Sec61beta	downstream_gene_variant	4,764792342
X2R_10508086_SNP	1,72E-05	11	56	21	56	0,156955346	2R:14620581	snoRNA:Me18S-A1061	upstream_gene_variant	4,764792342
X2R_10508086_SNP	1,72E-05	11	56	21	56	0,156955346	2R:14620581	snoRNA:Me18S-C1366	upstream_gene_variant	4,764792342
X2R_10508086_SNP	1,72E-05	11	56	21	56	0,156955346	2R:14620581	snoRNA:Me18S-G1952	upstream_gene_variant	4,764792342
X2R_10508086_SNP	1,72E-05	11	56	21	56	0,156955346	2R:14620581	snoRNA:Me28S-A992	upstream_gene_variant	4,764792342
X2R_10508086_SNP	1,72E-05	11	56	21	56	0,156955346	2R:14620581	snoRNA:Me28S-C3227a	upstream_gene_variant	4,764792342
X2R_10508086_SNP	1,72E-05	11	56	21	56	0,156955346	2R:14620581	snoRNA:Me28S-C3227b	upstream_gene_variant	4,764792342
X2R_10508086_SNP	1,72E-05	11	56	21	56	0,156955346	2R:14620581	snoRNA:Me28S-G2703a	upstream_gene_variant	4,764792342
X2R_10508086_SNP	1,72E-05	11	56	21	56	0,156955346	2R:14620581	snoRNA:Me28S-G2703b	upstream_gene_variant	4,764792342
X2R_10508086_SNP	1,72E-05	11	56	21	56	0,156955346	2R:14620581	snoRNA:Me28S-G2703c	upstream_gene_variant	4,764792342
X2R_10508086_SNP	1,72E-05	11	56	21	56	0,156955346	2R:14620581	snoRNA:Me28S-U1848	upstream_gene_variant	4,764792342
X2R_10508086_SNP	1,72E-05	11	56	21	56	0,156955346	2R:14620581	snoRNA:Or-CD4	upstream_gene_variant	4,764792342
X2R_10508086_SNP	1,72E-05	11	56	21	56	0,156955346	2R:14620581	Su(var)2-HP2	upstream_gene_variant	4,764792342
X2R_10508086_SNP	1,72E-05	11	56	21	56	0,156955346	2R:14620581	Uhg5	upstream_gene_variant	4,764792342
X2L_21941116_SNP	1,76E-05	43	13	59	16	0,159839707	2L:21941116	-	intergenic_variant	4,754567289
X2L_5628329_SNP	1,77E-05	65	2	73	7	0,159839707	2L:5628329	CG31646	intron_variant	4,752610602	CG31646
X2L_5628329_SNP	1,77E-05	65	2	73	7	0,159839707	2L:5628329	CR44822	downstream_gene_variant	4,752610602
X2L_5628329_SNP	1,77E-05	65	2	73	7	0,159839707	2L:5628329	Cyp6a16	upstream_gene_variant	4,752610602
X2R_10152110_SNP	1,78E-05	31	32	30	45	0,159839707	2R:14264605	beta4GalNAcTA	downstream_gene_variant	4,749778403
X2R_10152110_SNP	1,78E-05	31	32	30	45	0,159839707	2R:14264605	CG8547	intron_variant	4,749778403	CG8547
X2R_10152110_SNP	1,78E-05	31	32	30	45	0,159839707	2R:14264605	SelD	downstream_gene_variant	4,749778403
X2R_20164042_SNP	1,80E-05	61	6	64	13	0,159839707	2R:24276519	nvy	intron_variant	4,74368042	nvy
X2R_17985770_SNP	1,81E-05	53	12	57	20	0,159839707	2R:22098265	CG11073	intron_variant	4,742281597	CG11073
X2R_17985770_SNP	1,81E-05	53	12	57	20	0,159839707	2R:22098265	CG6613	upstream_gene_variant	4,742281597
X_16159947_SNP	1,81E-05	64	1	74	5	0,159839707	X:16265914	CG12507	intron_variant	4,742004578	CG12507
X_16159947_SNP	1,81E-05	64	1	74	5	0,159839707	X:16265914	kat80	downstream_gene_variant	4,742004578
X2L_17968688_SNP	1,82E-05	3	62	15	59	0,159839707	2L:17968688	btv	intron_variant	4,74065559	btv
X2L_17968688_SNP	1,82E-05	3	62	15	59	0,159839707	2L:17968688	CG5674	intron_variant	4,74065559	CG5674
X2R_15436212_SNP	1,82E-05	65	2	71	8	0,159839707	2R:19548707	CG43111	upstream_gene_variant	4,740258037
X2R_15436212_SNP	1,82E-05	65	2	71	8	0,159839707	2R:19548707	sm	intron_variant	4,740258037	sm
X2R_15436212_SNP	1,82E-05	65	2	71	8	0,159839707	2R:19548707	sm	upstream_gene_variant	4,740258037
X3R_25403537_INS	1,84E-05	38	21	45	29	0,160246242	3R:29577815	-	intergenic_variant	4,73444521
X2R_10278838_SNP	1,90E-05	66	1	75	5	0,160246242	2R:14391333	CG10104	synonymous_variant	4,721181488	CG10104
X2R_10305330_SNP	1,90E-05	1	66	5	75	0,160246242	2R:14417825	CG17386	upstream_gene_variant	4,721181488
X2R_10305330_SNP	1,90E-05	1	66	5	75	0,160246242	2R:14417825	Sin1	downstream_gene_variant	4,721181488
X2R_10325982_SNP	1,90E-05	66	1	75	5	0,160246242	2R:14438477	CR45277	upstream_gene_variant	4,721181488
X2R_10325982_SNP	1,90E-05	66	1	75	5	0,160246242	2R:14438477	Oaz	intron_variant	4,721181488	Oaz
X2R_10330054_SNP	1,90E-05	1	66	5	75	0,160246242	2R:14442549	Oaz	missense_variant	4,721181488	Oaz
X2R_10334759_SNP	1,90E-05	1	66	5	75	0,160246242	2R:14447254	Oaz	intron_variant	4,721181488	Oaz
X2R_10428328_SNP	1,90E-05	66	1	75	5	0,160246242	2R:14540823	CG30076	downstream_gene_variant	4,721181488
X2R_10428328_SNP	1,90E-05	66	1	75	5	0,160246242	2R:14540823	ttv	intron_variant	4,721181488	ttv
X2R_10437548_SNP	1,90E-05	66	1	75	5	0,160246242	2R:14550043	CG30076	upstream_gene_variant	4,721181488
X2R_10437548_SNP	1,90E-05	66	1	75	5	0,160246242	2R:14550043	CG43919	downstream_gene_variant	4,721181488
X2R_10437548_SNP	1,90E-05	66	1	75	5	0,160246242	2R:14550043	ttv	intron_variant	4,721181488	ttv
X2R_10486098_SNP	1,90E-05	1	66	5	75	0,160246242	2R:14598593	RpI1	missense_variant	4,721181488	RpI1
X2R_10486098_SNP	1,90E-05	1	66	5	75	0,160246242	2R:14598593	Blos1	upstream_gene_variant	4,721181488
X2R_10486098_SNP	1,90E-05	1	66	5	75	0,160246242	2R:14598593	CG12869	downstream_gene_variant	4,721181488
X2R_10486098_SNP	1,90E-05	1	66	5	75	0,160246242	2R:14598593	scaRNA:PsiU5-44	downstream_gene_variant	4,721181488
X2R_10486098_SNP	1,90E-05	1	66	5	75	0,160246242	2R:14598593	tra2	downstream_gene_variant	4,721181488
X2L_17066954_SNP	1,94E-05	5	60	4	73	0,162925919	2L:17066954	-	intergenic_variant	4,712027272
X2R_10585662_SNP	1,96E-05	62	4	70	7	0,163787241	2R:14698157	mspo	intron_variant	4,70779423	mspo
X2R_10473912_SNP	1,98E-05	65	1	75	5	0,16411809	2R:14586407	CG12869	upstream_gene_variant	4,703996626
X2R_10473912_SNP	1,98E-05	65	1	75	5	0,16411809	2R:14586407	ttv	3_prime_UTR_variant	4,703996626	ttv
X2R_10473912_SNP	1,98E-05	65	1	75	5	0,16411809	2R:14586407	ttv	downstream_gene_variant	4,703996626
X2L_19912392_DEL	1,99E-05	20	44	16	60	0,16411809	2L:19912392	CR43097	upstream_gene_variant	4,700634148
X2L_19912392_DEL	1,99E-05	20	44	16	60	0,16411809	2L:19912392	sick	intron_variant	4,700634148	sick
X2L_19912392_DEL	1,99E-05	20	44	16	60	0,16411809	2L:19912392	TotF	upstream_gene_variant	4,700634148
X2L_19912392_DEL	1,99E-05	20	44	16	60	0,16411809	2L:19912392	Victoria	downstream_gene_variant	4,700634148
X2R_10622212_SNP	1,99E-05	18	49	18	58	0,16411809	2R:14734707	CG12858	downstream_gene_variant	4,700181202
X2R_10622212_SNP	1,99E-05	18	49	18	58	0,16411809	2R:14734707	CR43428	downstream_gene_variant	4,700181202
X_8730690_SNP	2,01E-05	25	39	32	46	0,16411809	X:8836657	CG12075	upstream_gene_variant	4,69671126
X_8730690_SNP	2,01E-05	25	39	32	46	0,16411809	X:8836657	CR45537	non_coding_transcript_exon_variant	4,69671126	CR45537
X2R_10178086_SNP	2,02E-05	66	75	5	NA	0,16411809	2R:14290581	Ih	intron_variant	4,694663466	Ih
X2R_10178086_SNP	2,02E-05	66	75	5	NA	0,16411809	2R:14290581	Ih	upstream_gene_variant	4,694663466
X2R_10186537_SNP	2,03E-05	6	57	10	70	0,16411809	2R:14299032	Ih	3_prime_UTR_variant	4,693063343	Ih
X2R_10186537_SNP	2,03E-05	6	57	10	70	0,16411809	2R:14299032	Ih	downstream_gene_variant	4,693063343
X2R_10186537_SNP	2,03E-05	6	57	10	70	0,16411809	2R:14299032	tej	downstream_gene_variant	4,693063343
X_12617116_INS	2,03E-05	5	60	2	75	0,16411809	X:12723083	CR43963	intron_variant,non_coding_transcript_variant	4,692440855	CR43963
X_12617116_INS	2,03E-05	5	60	2	75	0,16411809	X:12723083	CR43963	upstream_gene_variant	4,692440855
X_12617116_INS	2,03E-05	5	60	2	75	0,16411809	X:12723083	Smr	intron_variant	4,692440855	Smr
X2R_10460496_SNP	2,03E-05	1	64	5	75	0,16411809	2R:14572991	LamC	intron_variant	4,691677877	LamC
X2R_10460496_SNP	2,03E-05	1	64	5	75	0,16411809	2R:14572991	ttv	intron_variant	4,691677877	ttv
X_20483123_INS	2,05E-05	52	4	59	8	0,165053912	X:20612096	RunxA	intron_variant	4,687340573	RunxA
X2R_10711112_SNP	2,09E-05	6	60	9	68	0,165193233	2R:14823607	CG10202	upstream_gene_variant	4,678891851
X2R_10711112_SNP	2,09E-05	6	60	9	68	0,165193233	2R:14823607	CR45329	non_coding_transcript_exon_variant	4,678891851	CR45329
X2R_10314543_DEL	2,10E-05	1	64	5	74	0,165193233	2R:14427038	CG17386	downstream_gene_variant	4,678129522
X2R_10314543_DEL	2,10E-05	1	64	5	74	0,165193233	2R:14427038	phyl	downstream_gene_variant	4,678129522
X2R_10476921_SNP	2,11E-05	66	1	74	5	0,165193233	2R:14589416	CG12869	upstream_gene_variant	4,676286823
X2R_10476921_SNP	2,11E-05	66	1	74	5	0,165193233	2R:14589416	ttv	downstream_gene_variant	4,676286823
X_15025286_SNP	2,12E-05	49	9	64	10	0,165193233	X:15131253	drd	intron_variant	4,673839121	drd
X2R_10212488_SNP	2,13E-05	63	5	72	NA	0,165193233	2R:14324983	Shroom	intron_variant	4,672303367	Shroom
X2R_11049033_SNP	2,13E-05	2	64	7	72	0,165193233	2R:15161528	CR43831	upstream_gene_variant	4,672088994
X2R_11049033_SNP	2,13E-05	2	64	7	72	0,165193233	2R:15161528	igl	intron_variant	4,672088994	igl
X2R_11049033_SNP	2,13E-05	2	64	7	72	0,165193233	2R:15161528	igl	upstream_gene_variant	4,672088994
X3L_14191636_SNP	2,14E-05	64	3	73	6	0,165193233	3L:14198536	CG32141	upstream_gene_variant	4,669244811
X3L_14191636_SNP	2,14E-05	64	3	73	6	0,165193233	3L:14198536	nuf	intron_variant	4,669244811	nuf
X_20635109_SNP	2,14E-05	9	58	6	73	0,165193233	X:20764082	CR43838	upstream_gene_variant	4,669158029
X_20635109_SNP	2,14E-05	9	58	6	73	0,165193233	X:20764082	CR44710	downstream_gene_variant	4,669158029
X_20635109_SNP	2,14E-05	9	58	6	73	0,165193233	X:20764082	shakB	3_prime_UTR_variant	4,669158029	shakB
X_20635109_SNP	2,14E-05	9	58	6	73	0,165193233	X:20764082	shakB	downstream_gene_variant	4,669158029
X2L_17999630_SNP	2,15E-05	60	6	68	9	0,165193233	2L:17999630	CR44604	upstream_gene_variant	4,668318073
X2L_17999630_SNP	2,15E-05	60	6	68	9	0,165193233	2L:17999630	CR44605	upstream_gene_variant	4,668318073
X2L_17999633_SNP	2,15E-05	60	6	68	9	0,165193233	2L:17999633	CR44604	upstream_gene_variant	4,668318073
X2L_17999633_SNP	2,15E-05	60	6	68	9	0,165193233	2L:17999633	CR44605	upstream_gene_variant	4,668318073
X2L_9082465_SNP	2,15E-05	57	2	63	9	0,165193233	2L:9082465	CG12439	downstream_gene_variant	4,666940237
X2L_9082465_SNP	2,15E-05	57	2	63	9	0,165193233	2L:9082465	Toll-4	upstream_gene_variant	4,666940237
X2L_19921664_SNP	2,18E-05	12	53	11	64	0,165934209	2L:19921664	CR43827	upstream_gene_variant	4,66208811
X2L_19921664_SNP	2,18E-05	12	53	11	64	0,165934209	2L:19921664	CR43828	non_coding_transcript_exon_variant	4,66208811	CR43828
X2L_19921664_SNP	2,18E-05	12	53	11	64	0,165934209	2L:19921664	sick	intron_variant	4,66208811	sick
X2R_8907360_SNP	2,18E-05	6	60	19	60	0,165934209	2R:13019855	-	intergenic_variant	4,661451278
X2R_9632106_SNP	2,20E-05	9	58	21	56	0,166494112	2R:13744601	fas	intron_variant	4,658226482	fas
X3L_12431239_SNP	2,24E-05	60	7	75	5	0,169293335	3L:12438139	-	intergenic_variant	4,649132972
X2L_17983663_SNP	2,25E-05	3	60	13	63	0,169293335	2L:17983663	btv	upstream_gene_variant	4,647483107
X2L_17983663_SNP	2,25E-05	3	60	13	63	0,169293335	2L:17983663	CG5681	upstream_gene_variant	4,647483107
X2R_11055574_SNP	2,26E-05	62	4	71	9	0,169431337	2R:15168069	igl	intron_variant	4,64538857	igl
X2R_14706695_SNP	2,30E-05	45	20	49	25	0,169595793	2R:18819190	CG15096	upstream_gene_variant	4,638939791
X2R_14706695_SNP	2,30E-05	45	20	49	25	0,169595793	2R:18819190	CG15097	downstream_gene_variant	4,638939791
X2R_14706695_SNP	2,30E-05	45	20	49	25	0,169595793	2R:18819190	CR43418	downstream_gene_variant	4,638939791
X2R_14706695_SNP	2,30E-05	45	20	49	25	0,169595793	2R:18819190	Phb2	upstream_gene_variant	4,638939791
X2R_10192843_SNP	2,30E-05	66	75	5	NA	0,169595793	2R:14305338	Shroom	upstream_gene_variant	4,63746965
X2R_10192843_SNP	2,30E-05	66	75	5	NA	0,169595793	2R:14305338	tej	upstream_gene_variant	4,63746965
X_651194_SNP	2,31E-05	59	6	71	8	0,169595793	X:757161	CG13361	upstream_gene_variant	4,636218284
X_651194_SNP	2,31E-05	59	6	71	8	0,169595793	X:757161	CG5254	intron_variant	4,636218284	CG5254
X_651194_SNP	2,31E-05	59	6	71	8	0,169595793	X:757161	CG5273	upstream_gene_variant	4,636218284
X_651194_SNP	2,31E-05	59	6	71	8	0,169595793	X:757161	CR44965	upstream_gene_variant	4,636218284
X2L_4271986_SNP	2,34E-05	3	64	14	62	0,169595793	2L:4271986	-	intergenic_variant	4,631340544
X_12998324_SNP	2,34E-05	50	15	61	16	0,169595793	X:13104291	CG43313	intron_variant	4,631198405	CG43313
X_12998324_SNP	2,34E-05	50	15	61	16	0,169595793	X:13104291	Fer3HCH	downstream_gene_variant	4,631198405
X_7013980_SNP	2,35E-05	63	1	72	5	0,169595793	X:7119947	CR45532	downstream_gene_variant	4,629260663
X2R_10632632_SNP	2,35E-05	6	61	7	72	0,169595793	2R:14745127	AttA	upstream_gene_variant	4,628475537
X2R_10632632_SNP	2,35E-05	6	61	7	72	0,169595793	2R:14745127	AttB	upstream_gene_variant	4,628475537
X2R_10632632_SNP	2,35E-05	6	61	7	72	0,169595793	2R:14745127	CG12858	intron_variant	4,628475537	CG12858
X2R_10632632_SNP	2,35E-05	6	61	7	72	0,169595793	2R:14745127	Dro	upstream_gene_variant	4,628475537
X2R_10325738_SNP	2,35E-05	1	64	5	73	0,169595793	2R:14438233	CR45277	upstream_gene_variant	4,628252952
X2R_10325738_SNP	2,35E-05	1	64	5	73	0,169595793	2R:14438233	Oaz	intron_variant	4,628252952	Oaz
X2R_3373740_SNP	2,39E-05	35	28	43	32	0,169595793	2R:7486235	Coop	downstream_gene_variant	4,621546135
X2R_3373740_SNP	2,39E-05	35	28	43	32	0,169595793	2R:7486235	wech	5_prime_UTR_variant	4,621546135	wech
X2R_3373740_SNP	2,39E-05	35	28	43	32	0,169595793	2R:7486235	wech	intron_variant	4,621546135	wech
X2R_12370458_SNP	2,41E-05	63	3	71	8	0,169595793	2R:16482953	CG15712	downstream_gene_variant	4,618467619
X2R_12370458_SNP	2,41E-05	63	3	71	8	0,169595793	2R:16482953	CG33458	upstream_gene_variant	4,618467619
X2R_10476909_INS	2,41E-05	66	74	5	NA	0,169595793	2R:14589404	CG12869	upstream_gene_variant	4,618246678
X2R_10476909_INS	2,41E-05	66	74	5	NA	0,169595793	2R:14589404	ttv	downstream_gene_variant	4,618246678
X2R_14706585_INS	2,43E-05	62	5	70	9	0,169595793	2R:18819080	CG15096	upstream_gene_variant	4,614670476
X2R_14706585_INS	2,43E-05	62	5	70	9	0,169595793	2R:18819080	CG15097	downstream_gene_variant	4,614670476
X2R_14706585_INS	2,43E-05	62	5	70	9	0,169595793	2R:18819080	CR43418	downstream_gene_variant	4,614670476
X2R_14706585_INS	2,43E-05	62	5	70	9	0,169595793	2R:18819080	Phb2	upstream_gene_variant	4,614670476
X_11033149_SNP	2,43E-05	2	65	6	73	0,169595793	X:11139116	CG15199	downstream_gene_variant	4,614195033
X_11033149_SNP	2,43E-05	2	65	6	73	0,169595793	X:11139116	CG15202	upstream_gene_variant	4,614195033
X_11033149_SNP	2,43E-05	2	65	6	73	0,169595793	X:11139116	CG18292	3_prime_UTR_variant	4,614195033	CG18292
X_11033149_SNP	2,43E-05	2	65	6	73	0,169595793	X:11139116	CR44054	upstream_gene_variant	4,614195033
X_11033149_SNP	2,43E-05	2	65	6	73	0,169595793	X:11139116	Klp10A	upstream_gene_variant	4,614195033
X_11033149_SNP	2,43E-05	2	65	6	73	0,169595793	X:11139116	ssp7	downstream_gene_variant	4,614195033
X2R_10152415_SNP	2,44E-05	17	35	29	39	0,169595793	2R:14264910	beta4GalNAcTA	downstream_gene_variant	4,611800187
X2R_10152415_SNP	2,44E-05	17	35	29	39	0,169595793	2R:14264910	CG8547	intron_variant	4,611800187	CG8547
X2R_10152415_SNP	2,44E-05	17	35	29	39	0,169595793	2R:14264910	SelD	downstream_gene_variant	4,611800187
X2L_19912387_SNP	2,45E-05	20	43	16	61	0,169595793	2L:19912387	CR43097	upstream_gene_variant	4,611230989
X2L_19912387_SNP	2,45E-05	20	43	16	61	0,169595793	2L:19912387	sick	intron_variant	4,611230989	sick
X2L_19912387_SNP	2,45E-05	20	43	16	61	0,169595793	2L:19912387	TotF	upstream_gene_variant	4,611230989
X2L_19912387_SNP	2,45E-05	20	43	16	61	0,169595793	2L:19912387	Victoria	downstream_gene_variant	4,611230989
X2R_10172552_SNP	2,46E-05	66	5	74	NA	0,169595793	2R:14285047	Ih	intron_variant	4,608208271	Ih
X2R_10172552_SNP	2,46E-05	66	5	74	NA	0,169595793	2R:14285047	Ih	upstream_gene_variant	4,608208271
X2R_14392525_SNP	2,47E-05	63	3	73	6	0,169595793	2R:18505020	GstE11	3_prime_UTR_variant	4,607316762	GstE11
X2R_14392525_SNP	2,47E-05	63	3	73	6	0,169595793	2R:18505020	GstE11	downstream_gene_variant	4,607316762
X2R_10187769_SNP	2,49E-05	67	5	75	NA	0,169595793	2R:14300264	tej	missense_variant	4,603329812	tej
X2R_10187769_SNP	2,49E-05	67	5	75	NA	0,169595793	2R:14300264	Ih	downstream_gene_variant	4,603329812
X2R_10193359_SNP	2,49E-05	67	5	75	NA	0,169595793	2R:14305854	Shroom	upstream_gene_variant	4,603329812
X2R_10193359_SNP	2,49E-05	67	5	75	NA	0,169595793	2R:14305854	tej	upstream_gene_variant	4,603329812
X2R_10194662_SNP	2,49E-05	67	5	75	NA	0,169595793	2R:14307157	Shroom	upstream_gene_variant	4,603329812
X2R_10194662_SNP	2,49E-05	67	5	75	NA	0,169595793	2R:14307157	tej	upstream_gene_variant	4,603329812
X2R_10197847_SNP	2,49E-05	67	5	75	NA	0,169595793	2R:14310342	Shroom	intron_variant	4,603329812	Shroom
X2R_10241915_SNP	2,49E-05	67	5	75	NA	0,169595793	2R:14354410	CG8613	synonymous_variant	4,603329812	CG8613
X2R_10241915_SNP	2,49E-05	67	5	75	NA	0,169595793	2R:14354410	Arc1	downstream_gene_variant	4,603329812
X2R_10241915_SNP	2,49E-05	67	5	75	NA	0,169595793	2R:14354410	CG8617	downstream_gene_variant	4,603329812
X2R_10241915_SNP	2,49E-05	67	5	75	NA	0,169595793	2R:14354410	Shroom	downstream_gene_variant	4,603329812
X2R_10262194_SNP	2,49E-05	67	5	75	NA	0,169595793	2R:14374689	Obp50e	synonymous_variant	4,603329812	Obp50e
X2R_10262194_SNP	2,49E-05	67	5	75	NA	0,169595793	2R:14374689	CG30075	upstream_gene_variant	4,603329812
X2R_10262194_SNP	2,49E-05	67	5	75	NA	0,169595793	2R:14374689	CG34185	upstream_gene_variant	4,603329812
X2R_10262194_SNP	2,49E-05	67	5	75	NA	0,169595793	2R:14374689	CG34444	downstream_gene_variant	4,603329812
X2R_10262194_SNP	2,49E-05	67	5	75	NA	0,169595793	2R:14374689	Dh44-R1	upstream_gene_variant	4,603329812
X2R_10262194_SNP	2,49E-05	67	5	75	NA	0,169595793	2R:14374689	Obp50a	upstream_gene_variant	4,603329812
X2R_10262194_SNP	2,49E-05	67	5	75	NA	0,169595793	2R:14374689	Obp50b	downstream_gene_variant	4,603329812
X2R_10262194_SNP	2,49E-05	67	5	75	NA	0,169595793	2R:14374689	Obp50c	downstream_gene_variant	4,603329812
X2R_10262194_SNP	2,49E-05	67	5	75	NA	0,169595793	2R:14374689	Obp50d	downstream_gene_variant	4,603329812
X2R_10371677_SNP	2,50E-05	16	47	22	55	0,169595793	2R:14484172	L	intron_variant	4,602131916	L
X2R_10188595_SNP	2,51E-05	67	75	5	NA	0,169595793	2R:14301090	Ih	downstream_gene_variant	4,599674979
X2R_10188595_SNP	2,51E-05	67	75	5	NA	0,169595793	2R:14301090	tej	intron_variant	4,599674979	tej
X2R_10228262_SNP	2,51E-05	67	75	5	NA	0,169595793	2R:14340757	Shroom	intron_variant	4,599674979	Shroom
X2R_10228262_SNP	2,51E-05	67	75	5	NA	0,169595793	2R:14340757	Shroom	upstream_gene_variant	4,599674979
X2R_10254996_SNP	2,51E-05	67	75	5	NA	0,169595793	2R:14367491	Arc2	downstream_gene_variant	4,599674979
X2R_10254996_SNP	2,51E-05	67	75	5	NA	0,169595793	2R:14367491	CG34184	downstream_gene_variant	4,599674979
X2R_10254996_SNP	2,51E-05	67	75	5	NA	0,169595793	2R:14367491	CG34442	intron_variant	4,599674979	CG34442
X2R_10254996_SNP	2,51E-05	67	75	5	NA	0,169595793	2R:14367491	CG34443	upstream_gene_variant	4,599674979
X2R_10254996_SNP	2,51E-05	67	75	5	NA	0,169595793	2R:14367491	CG34444	upstream_gene_variant	4,599674979
X2R_10254996_SNP	2,51E-05	67	75	5	NA	0,169595793	2R:14367491	Obp50a	downstream_gene_variant	4,599674979
X2R_10254996_SNP	2,51E-05	67	75	5	NA	0,169595793	2R:14367491	Obp50b	upstream_gene_variant	4,599674979
X2R_10254996_SNP	2,51E-05	67	75	5	NA	0,169595793	2R:14367491	Obp50c	upstream_gene_variant	4,599674979
X2R_10254996_SNP	2,51E-05	67	75	5	NA	0,169595793	2R:14367491	Tfb1	downstream_gene_variant	4,599674979
X_16159938_SNP	2,53E-05	2	60	5	73	0,169595793	X:16265905	CG12507	intron_variant	4,597706799	CG12507
X_16159938_SNP	2,53E-05	2	60	5	73	0,169595793	X:16265905	kat80	downstream_gene_variant	4,597706799
X_21867241_SNP	2,53E-05	5	62	6	72	0,169595793	X:22465405	CG14619	synonymous_variant	4,596162198	CG14619
X_21867241_SNP	2,53E-05	5	62	6	72	0,169595793	X:22465405	CG14613	downstream_gene_variant	4,596162198
X_21867241_SNP	2,53E-05	5	62	6	72	0,169595793	X:22465405	CG14619	intron_variant	4,596162198	CG14619
X_21867241_SNP	2,53E-05	5	62	6	72	0,169595793	X:22465405	CG14619	upstream_gene_variant	4,596162198
X2R_10176953_SNP	2,54E-05	66	75	5	NA	0,169595793	2R:14289448	Ih	intron_variant	4,59574921	Ih
X2R_10176953_SNP	2,54E-05	66	75	5	NA	0,169595793	2R:14289448	Ih	upstream_gene_variant	4,59574921
X2R_17776102_INS	2,57E-05	53	7	68	6	0,17029485	2R:21888597	Fili	intron_variant	4,589312671	Fili
X2R_7470856_SNP	2,58E-05	59	5	74	4	0,17029485	2R:11583351	tou	synonymous_variant	4,58879863	tou
X2R_7470856_SNP	2,58E-05	59	5	74	4	0,17029485	2R:11583351	snoRNA:Psi28S-1936	downstream_gene_variant	4,58879863
X2R_7470856_SNP	2,58E-05	59	5	74	4	0,17029485	2R:11583351	tou	upstream_gene_variant	4,58879863
X2R_10172494_SNP	2,58E-05	66	74	5	NA	0,17029485	2R:14284989	Ih	intron_variant	4,588502688	Ih
X2R_10172494_SNP	2,58E-05	66	74	5	NA	0,17029485	2R:14284989	Ih	upstream_gene_variant	4,588502688
X2R_7476182_SNP	2,58E-05	5	59	11	68	0,17029485	2R:11588677	snoRNA:Psi28S-1180	downstream_gene_variant	4,587802461
X2R_7476182_SNP	2,58E-05	5	59	11	68	0,17029485	2R:11588677	snoRNA:Psi28S-1936	upstream_gene_variant	4,587802461
X2R_7476182_SNP	2,58E-05	5	59	11	68	0,17029485	2R:11588677	tou	intron_variant	4,587802461	tou
X2R_10735980_SNP	2,61E-05	64	3	68	7	0,171160331	2R:14848475	CG10209	upstream_gene_variant	4,583920277
X2R_10735980_SNP	2,61E-05	64	3	68	7	0,171160331	2R:14848475	Ercc1	upstream_gene_variant	4,583920277
X2R_10735980_SNP	2,61E-05	64	3	68	7	0,171160331	2R:14848475	NaPi-T	upstream_gene_variant	4,583920277
X2R_10735980_SNP	2,61E-05	64	3	68	7	0,171160331	2R:14848475	SMC2	downstream_gene_variant	4,583920277
X3R_22998389_SNP	2,62E-05	15	42	22	37	0,171160331	3R:27172667	Ser	3_prime_UTR_variant	4,581044776	Ser
X2R_10250356_SNP	2,63E-05	65	5	74	NA	0,171160331	2R:14362851	Arc1	upstream_gene_variant	4,580638138
X2R_10250356_SNP	2,63E-05	65	5	74	NA	0,171160331	2R:14362851	Arc2	downstream_gene_variant	4,580638138
X2R_10250356_SNP	2,63E-05	65	5	74	NA	0,171160331	2R:14362851	CG34184	upstream_gene_variant	4,580638138
X2R_10250356_SNP	2,63E-05	65	5	74	NA	0,171160331	2R:14362851	CG34442	upstream_gene_variant	4,580638138
X2R_10250356_SNP	2,63E-05	65	5	74	NA	0,171160331	2R:14362851	CR10102	upstream_gene_variant	4,580638138
X2R_10250356_SNP	2,63E-05	65	5	74	NA	0,171160331	2R:14362851	Tfb1	upstream_gene_variant	4,580638138
X2R_13657166_SNP	2,63E-05	15	51	20	58	0,171160331	2R:17769661	CG18635	synonymous_variant	4,579526709	CG18635
X2R_13657166_SNP	2,63E-05	15	51	20	58	0,171160331	2R:17769661	CG14488	upstream_gene_variant	4,579526709
X2R_13657166_SNP	2,63E-05	15	51	20	58	0,171160331	2R:17769661	CG33981	downstream_gene_variant	4,579526709
X2R_13657166_SNP	2,63E-05	15	51	20	58	0,171160331	2R:17769661	CG6362	downstream_gene_variant	4,579526709
X2R_13657166_SNP	2,63E-05	15	51	20	58	0,171160331	2R:17769661	CR44416	downstream_gene_variant	4,579526709
X2R_13657166_SNP	2,63E-05	15	51	20	58	0,171160331	2R:17769661	fab1	downstream_gene_variant	4,579526709
X2R_13657166_SNP	2,63E-05	15	51	20	58	0,171160331	2R:17769661	mir-3643	upstream_gene_variant	4,579526709
X2R_13657166_SNP	2,63E-05	15	51	20	58	0,171160331	2R:17769661	OstDelta	upstream_gene_variant	4,579526709
X2L_9203366_SNP	2,65E-05	53	7	74	4	0,171358043	2L:9203366	tai	intron_variant	4,577519979	tai
X2R_7475985_SNP	2,69E-05	58	5	68	11	0,172426895	2R:11588480	tou	synonymous_variant	4,570306814	tou
X2R_7475985_SNP	2,69E-05	58	5	68	11	0,172426895	2R:11588480	snoRNA:Psi28S-1180	downstream_gene_variant	4,570306814
X2R_7475985_SNP	2,69E-05	58	5	68	11	0,172426895	2R:11588480	snoRNA:Psi28S-1936	upstream_gene_variant	4,570306814
X2L_15806925_SNP	2,70E-05	11	35	6	48	0,172426895	2L:15806925	CG42876	downstream_gene_variant	4,568515937
X2L_15806925_SNP	2,70E-05	11	35	6	48	0,172426895	2L:15806925	CR44602	downstream_gene_variant	4,568515937
X_5719856_SNP	2,71E-05	54	10	68	9	0,172426895	X:5825823	CG15765	intron_variant	4,566768929	CG15765
X2L_17930814_SNP	2,72E-05	3	61	17	56	0,172426895	2L:17930814	-	intergenic_variant	4,565232675
X_17250853_SNP	2,72E-05	17	48	14	62	0,172426895	X:17356820	-	intergenic_variant	4,565057955
X3L_11840221_SNP	2,76E-05	16	47	19	57	0,172426895	3L:11847121	CG12521	downstream_gene_variant	4,559237124
X3L_11840221_SNP	2,76E-05	16	47	19	57	0,172426895	3L:11847121	CG44837	downstream_gene_variant	4,559237124
X2R_18508190_SNP	2,77E-05	3	64	5	75	0,172426895	2R:22620685	CG33143	5_prime_UTR_variant	4,558139817	CG33143
X2R_7464443_SNP	2,78E-05	5	62	7	72	0,172426895	2R:11576938	tou	downstream_gene_variant	4,556209137
X2R_13044624_DEL	2,78E-05	64	2	74	5	0,172426895	2R:17157119	CG17287	3_prime_UTR_variant	4,556178032	CG17287
X2R_13044624_DEL	2,78E-05	64	2	74	5	0,172426895	2R:17157119	CG17290	3_prime_UTR_variant	4,556178032	CG17290
X2R_13044624_DEL	2,78E-05	64	2	74	5	0,172426895	2R:17157119	CG17290	downstream_gene_variant	4,556178032
X2R_13044624_DEL	2,78E-05	64	2	74	5	0,172426895	2R:17157119	CG30457	downstream_gene_variant	4,556178032
X2R_13044624_DEL	2,78E-05	64	2	74	5	0,172426895	2R:17157119	CG30458	downstream_gene_variant	4,556178032
X2L_17060671_SNP	2,78E-05	4	60	10	65	0,172426895	2L:17060671	-	intergenic_variant	4,556044884
X3R_20909642_SNP	2,81E-05	52	9	66	9	0,172426895	3R:25083920	fd96Ca	synonymous_variant	4,550584551	fd96Ca
X2R_10252498_SNP	2,82E-05	59	7	73	5	0,172426895	2R:14364993	Tfb1	splice_region_variant,intron_variant	4,55001432	Tfb1
X2R_10252498_SNP	2,82E-05	59	7	73	5	0,172426895	2R:14364993	Arc1	upstream_gene_variant	4,55001432
X2R_10252498_SNP	2,82E-05	59	7	73	5	0,172426895	2R:14364993	Arc2	downstream_gene_variant	4,55001432
X2R_10252498_SNP	2,82E-05	59	7	73	5	0,172426895	2R:14364993	CG34184	upstream_gene_variant	4,55001432
X2R_10252498_SNP	2,82E-05	59	7	73	5	0,172426895	2R:14364993	CG34442	upstream_gene_variant	4,55001432
X2R_10252498_SNP	2,82E-05	59	7	73	5	0,172426895	2R:14364993	CG34443	upstream_gene_variant	4,55001432
X2R_10252498_SNP	2,82E-05	59	7	73	5	0,172426895	2R:14364993	CG34444	upstream_gene_variant	4,55001432
X2R_10252498_SNP	2,82E-05	59	7	73	5	0,172426895	2R:14364993	CR10102	upstream_gene_variant	4,55001432
X2R_10108081_SNP	2,82E-05	67	6	74	NA	0,172426895	2R:14220576	CG8468	5_prime_UTR_variant	4,549935891	CG8468
X2R_10108081_SNP	2,82E-05	67	6	74	NA	0,172426895	2R:14220576	CG8468	intron_variant	4,549935891	CG8468
X2R_10108081_SNP	2,82E-05	67	6	74	NA	0,172426895	2R:14220576	mir-308	upstream_gene_variant	4,549935891
X2R_10108081_SNP	2,82E-05	67	6	74	NA	0,172426895	2R:14220576	RpS23	upstream_gene_variant	4,549935891
X2R_10704614_SNP	2,82E-05	3	63	6	74	0,172426895	2R:14817109	CG10202	downstream_gene_variant	4,54944453
X2R_10258468_SNP	2,82E-05	67	74	5	NA	0,172426895	2R:14370963	Obp50a	missense_variant	4,549365126	Obp50a
X2R_10258468_SNP	2,82E-05	67	74	5	NA	0,172426895	2R:14370963	CG30075	upstream_gene_variant	4,549365126
X2R_10258468_SNP	2,82E-05	67	74	5	NA	0,172426895	2R:14370963	CG34184	downstream_gene_variant	4,549365126
X2R_10258468_SNP	2,82E-05	67	74	5	NA	0,172426895	2R:14370963	CG34185	downstream_gene_variant	4,549365126
X2R_10258468_SNP	2,82E-05	67	74	5	NA	0,172426895	2R:14370963	CG34442	downstream_gene_variant	4,549365126
X2R_10258468_SNP	2,82E-05	67	74	5	NA	0,172426895	2R:14370963	CG34443	downstream_gene_variant	4,549365126
X2R_10258468_SNP	2,82E-05	67	74	5	NA	0,172426895	2R:14370963	CG34444	downstream_gene_variant	4,549365126
X2R_10258468_SNP	2,82E-05	67	74	5	NA	0,172426895	2R:14370963	Obp50b	upstream_gene_variant	4,549365126
X2R_10258468_SNP	2,82E-05	67	74	5	NA	0,172426895	2R:14370963	Obp50c	upstream_gene_variant	4,549365126
X2R_10258468_SNP	2,82E-05	67	74	5	NA	0,172426895	2R:14370963	Obp50d	upstream_gene_variant	4,549365126
X2R_10258468_SNP	2,82E-05	67	74	5	NA	0,172426895	2R:14370963	Obp50e	downstream_gene_variant	4,549365126
X3L_7854856_SNP	2,82E-05	33	32	41	36	0,172426895	3L:7861756	Pdp1	intron_variant	4,549241126	Pdp1
X2L_9304036_SNP	2,87E-05	56	6	69	11	0,172426895	2L:9304036	CR42844	downstream_gene_variant	4,54207513
X2L_9304036_SNP	2,87E-05	56	6	69	11	0,172426895	2L:9304036	Ggamma30A	downstream_gene_variant	4,54207513
X_8865515_SNP	2,87E-05	66	5	75	NA	0,172426895	X:8971482	CG10962	downstream_gene_variant	4,541855941
X_8865515_SNP	2,87E-05	66	5	75	NA	0,172426895	X:8971482	CR43836	downstream_gene_variant	4,541855941
X_8865515_SNP	2,87E-05	66	5	75	NA	0,172426895	X:8971482	rdgA	intron_variant	4,541855941	rdgA
X2R_10700592_SNP	2,88E-05	6	61	6	74	0,172426895	2R:14813087	CG10202	downstream_gene_variant	4,539878269
X2R_10700592_SNP	2,88E-05	6	61	6	74	0,172426895	2R:14813087	hui	downstream_gene_variant	4,539878269
X2R_8427933_SNP	2,90E-05	4	62	6	73	0,172426895	2R:12540428	fra	intron_variant	4,537203832	fra
X2L_19921170_SNP	2,91E-05	26	34	25	50	0,172426895	2L:19921170	CR43827	upstream_gene_variant	4,535793716
X2L_19921170_SNP	2,91E-05	26	34	25	50	0,172426895	2L:19921170	CR43828	non_coding_transcript_exon_variant	4,535793716	CR43828
X2L_19921170_SNP	2,91E-05	26	34	25	50	0,172426895	2L:19921170	sick	intron_variant	4,535793716	sick
X2R_18430560_SNP	2,92E-05	20	43	29	47	0,172426895	2R:22543055	px	intron_variant	4,534607184	px
X2R_10716148_SNP	2,93E-05	52	12	58	18	0,172426895	2R:14828643	CG10205	upstream_gene_variant	4,533659337
X2R_10716148_SNP	2,93E-05	52	12	58	18	0,172426895	2R:14828643	CR45329	upstream_gene_variant	4,533659337
X3L_11840419_SNP	2,93E-05	47	15	60	18	0,172426895	3L:11847319	CG12521	downstream_gene_variant	4,533437086
X3L_11840419_SNP	2,93E-05	47	15	60	18	0,172426895	3L:11847319	CG44837	downstream_gene_variant	4,533437086
X2R_10170126_SNP	2,93E-05	66	73	5	NA	0,172426895	2R:14282621	Ih	intron_variant	4,533036638	Ih
X_11031712_SNP	2,93E-05	2	64	7	72	0,172426895	X:11137679	CG15199	downstream_gene_variant	4,532932472
X_11031712_SNP	2,93E-05	2	64	7	72	0,172426895	X:11137679	CG15202	upstream_gene_variant	4,532932472
X_11031712_SNP	2,93E-05	2	64	7	72	0,172426895	X:11137679	CG18292	upstream_gene_variant	4,532932472
X_11031712_SNP	2,93E-05	2	64	7	72	0,172426895	X:11137679	CR44054	upstream_gene_variant	4,532932472
X_11031712_SNP	2,93E-05	2	64	7	72	0,172426895	X:11137679	Klp10A	upstream_gene_variant	4,532932472
X_11031712_SNP	2,93E-05	2	64	7	72	0,172426895	X:11137679	ssp7	downstream_gene_variant	4,532932472
X3L_12171036_SNP	2,93E-05	67	75	5	NA	0,172426895	3L:12177936	CAH2	intron_variant	4,532774568	CAH2
X3L_12171036_SNP	2,93E-05	67	75	5	NA	0,172426895	3L:12177936	CAH2	upstream_gene_variant	4,532774568
X3L_12171036_SNP	2,93E-05	67	75	5	NA	0,172426895	3L:12177936	Rh7	upstream_gene_variant	4,532774568
X2R_10608696_SNP	2,93E-05	7	58	10	66	0,172426895	2R:14721191	-	intergenic_variant	4,532686012
X_21651410_SNP	2,94E-05	26	17	21	20	0,172426895	X:21780383	flam	intron_variant,non_coding_transcript_variant	4,532035579	flam
X2L_3272651_SNP	2,94E-05	20	43	29	44	0,172426895	2L:3272651	CG3332	downstream_gene_variant	4,531579259
X2L_3272651_SNP	2,94E-05	20	43	29	44	0,172426895	2L:3272651	CG3347	downstream_gene_variant	4,531579259
X2L_3272651_SNP	2,94E-05	20	43	29	44	0,172426895	2L:3272651	CR44484	downstream_gene_variant	4,531579259
X3L_9799207_SNP	2,95E-05	17	49	19	58	0,172426895	3L:9806107	CG32052	intron_variant	4,529785824	CG32052
X3L_9799207_SNP	2,95E-05	17	49	19	58	0,172426895	3L:9806107	Ilp3	upstream_gene_variant	4,529785824
X3L_9799207_SNP	2,95E-05	17	49	19	58	0,172426895	3L:9806107	Ilp4	upstream_gene_variant	4,529785824
X2R_7474501_SNP	2,96E-05	5	59	8	71	0,172426895	2R:11586996	tou	synonymous_variant	4,529212275	tou
X2R_7474501_SNP	2,96E-05	5	59	8	71	0,172426895	2R:11586996	snoRNA:Psi28S-1180	downstream_gene_variant	4,529212275
X2R_7474501_SNP	2,96E-05	5	59	8	71	0,172426895	2R:11586996	snoRNA:Psi28S-1936	downstream_gene_variant	4,529212275
X2R_7474501_SNP	2,96E-05	5	59	8	71	0,172426895	2R:11586996	tou	upstream_gene_variant	4,529212275
X3R_15095024_SNP	2,97E-05	55	6	68	6	0,172601225	3R:19269302	-	intergenic_variant	4,527394191
X_757844_SNP	2,98E-05	63	3	75	5	0,172601225	X:863811	CG14634	downstream_gene_variant	4,525968423
X_757844_SNP	2,98E-05	63	3	75	5	0,172601225	X:863811	CG43867	intron_variant	4,525968423	CG43867
X_21217520_SNP	2,99E-05	7	60	5	72	0,172601225	X:21346493	dod	3_prime_UTR_variant	4,5236854	dod
X_21217520_SNP	2,99E-05	7	60	5	72	0,172601225	X:21346493	fliI	downstream_gene_variant	4,5236854
X_21217520_SNP	2,99E-05	7	60	5	72	0,172601225	X:21346493	pen	downstream_gene_variant	4,5236854
X_21217520_SNP	2,99E-05	7	60	5	72	0,172601225	X:21346493	sol	upstream_gene_variant	4,5236854
X3R_20909645_SNP	3,01E-05	9	51	10	66	0,172601225	3R:25083923	fd96Ca	synonymous_variant	4,521963638	fd96Ca
X2L_20965999_SNP	3,01E-05	5	61	3	77	0,172601225	2L:20965999	CG42238	3_prime_UTR_variant	4,521283764	CG42238
X2L_3602964_SNP	3,01E-05	15	49	14	62	0,172601225	2L:3602964	odd	downstream_gene_variant	4,520730689
X2R_13480827_DEL	3,05E-05	41	26	48	31	0,173629692	2R:17593322	CG11423	upstream_gene_variant	4,515675812
X2R_13480827_DEL	3,05E-05	41	26	48	31	0,173629692	2R:17593322	CG30105	upstream_gene_variant	4,515675812
X2R_13480827_DEL	3,05E-05	41	26	48	31	0,173629692	2R:17593322	icln	downstream_gene_variant	4,515675812
X2R_13480827_DEL	3,05E-05	41	26	48	31	0,173629692	2R:17593322	RhoGAP54D	upstream_gene_variant	4,515675812
X2R_13480827_DEL	3,05E-05	41	26	48	31	0,173629692	2R:17593322	Smurf	intron_variant	4,515675812	Smurf
X2L_19973758_DEL	3,05E-05	21	27	25	42	0,173629692	2L:19973758	CG43861	intron_variant	4,515502424	CG43861
X2R_7476111_SNP	3,10E-05	59	7	67	12	0,175840963	2R:11588606	tou	synonymous_variant	4,508688323	tou
X2R_7476111_SNP	3,10E-05	59	7	67	12	0,175840963	2R:11588606	snoRNA:Psi28S-1180	downstream_gene_variant	4,508688323
X2R_7476111_SNP	3,10E-05	59	7	67	12	0,175840963	2R:11588606	snoRNA:Psi28S-1936	upstream_gene_variant	4,508688323
X2L_17923288_SNP	3,11E-05	2	60	8	65	0,17590901	2L:17923288	CR43274	upstream_gene_variant	4,507206237
X2R_2482476_SNP	3,14E-05	10	54	13	63	0,176606456	2R:6594971	jing	intron_variant	4,503378894	jing
X2L_12849921_SNP	3,14E-05	59	6	66	12	0,176606456	2L:12849921	-	intergenic_variant	4,502871507
X3L_5028474_SNP	3,15E-05	39	27	40	37	0,176755283	3L:5028474	Con	intron_variant	4,501203446	Con
X2L_19921195_SNP	3,19E-05	37	25	33	41	0,176986481	2L:19921195	CR43827	upstream_gene_variant	4,49675232
X2L_19921195_SNP	3,19E-05	37	25	33	41	0,176986481	2L:19921195	CR43828	non_coding_transcript_exon_variant	4,49675232	CR43828
X2L_19921195_SNP	3,19E-05	37	25	33	41	0,176986481	2L:19921195	sick	intron_variant	4,49675232	sick
X2L_19921196_SNP	3,19E-05	25	37	41	33	0,176986481	2L:19921196	CR43827	upstream_gene_variant	4,49675232
X2L_19921196_SNP	3,19E-05	25	37	41	33	0,176986481	2L:19921196	CR43828	non_coding_transcript_exon_variant	4,49675232	CR43828
X2L_19921196_SNP	3,19E-05	25	37	41	33	0,176986481	2L:19921196	sick	intron_variant	4,49675232	sick
X2L_19921200_SNP	3,19E-05	37	25	33	41	0,176986481	2L:19921200	CR43827	upstream_gene_variant	4,49675232
X2L_19921200_SNP	3,19E-05	37	25	33	41	0,176986481	2L:19921200	CR43828	non_coding_transcript_exon_variant	4,49675232	CR43828
X2L_19921200_SNP	3,19E-05	37	25	33	41	0,176986481	2L:19921200	sick	intron_variant	4,49675232	sick
X2R_3836505_SNP	3,22E-05	7	58	17	56	0,178419998	2R:7949000	CG11165	upstream_gene_variant	4,491962086
X2R_3836505_SNP	3,22E-05	7	58	17	56	0,178419998	2R:7949000	CG14764	downstream_gene_variant	4,491962086
X2R_3836505_SNP	3,22E-05	7	58	17	56	0,178419998	2R:7949000	CG14764	intron_variant	4,491962086	CG14764
X2R_3836505_SNP	3,22E-05	7	58	17	56	0,178419998	2R:7949000	CG30378	upstream_gene_variant	4,491962086
X2R_3836505_SNP	3,22E-05	7	58	17	56	0,178419998	2R:7949000	CG34430	downstream_gene_variant	4,491962086
X2R_3836505_SNP	3,22E-05	7	58	17	56	0,178419998	2R:7949000	CG34431	downstream_gene_variant	4,491962086
X3L_20157463_SNP	3,26E-05	8	54	8	69	0,179808885	3L:20164363	CG42674	5_prime_UTR_variant	4,487311469	CG42674
X3L_20157463_SNP	3,26E-05	8	54	8	69	0,179808885	3L:20164363	CG42674	intron_variant	4,487311469	CG42674
X3L_20157463_SNP	3,26E-05	8	54	8	69	0,179808885	3L:20164363	CR45942	downstream_gene_variant	4,487311469
X2L_3852722_SNP	3,28E-05	39	21	43	34	0,180435967	2L:3852722	CR45449	downstream_gene_variant	4,483983445
X2L_3852722_SNP	3,28E-05	39	21	43	34	0,180435967	2L:3852722	CR45450	downstream_gene_variant	4,483983445
X2L_3852722_SNP	3,28E-05	39	21	43	34	0,180435967	2L:3852722	CR45451	downstream_gene_variant	4,483983445
X2R_17932823_SNP	3,29E-05	27	40	28	46	0,180435967	2R:22045318	PpD5	upstream_gene_variant	4,483244824
X2L_19921563_SNP	3,32E-05	52	12	63	14	0,181422666	2L:19921563	CR43827	upstream_gene_variant	4,478884809
X2L_19921563_SNP	3,32E-05	52	12	63	14	0,181422666	2L:19921563	CR43828	non_coding_transcript_exon_variant	4,478884809	CR43828
X2L_19921563_SNP	3,32E-05	52	12	63	14	0,181422666	2L:19921563	sick	intron_variant	4,478884809	sick
X2R_14706709_SNP	3,33E-05	45	21	48	26	0,181422666	2R:18819204	CG15096	upstream_gene_variant	4,477106446
X2R_14706709_SNP	3,33E-05	45	21	48	26	0,181422666	2R:18819204	CG15097	downstream_gene_variant	4,477106446
X2R_14706709_SNP	3,33E-05	45	21	48	26	0,181422666	2R:18819204	CR43418	downstream_gene_variant	4,477106446
X2R_14706709_SNP	3,33E-05	45	21	48	26	0,181422666	2R:18819204	Phb2	upstream_gene_variant	4,477106446
X3L_14189692_SNP	3,36E-05	41	24	57	19	0,181422666	3L:14196592	nuf	intron_variant	4,473149564	nuf
X2R_15095209_SNP	3,39E-05	67	5	75	NA	0,181422666	2R:19207704	hppy	intron_variant	4,469486288	hppy
X3L_19864812_SNP	3,39E-05	26	31	29	43	0,181422666	3L:19871712	CG8334	intron_variant	4,469323864	CG8334
X3L_19864812_SNP	3,39E-05	26	31	29	43	0,181422666	3L:19871712	Rab8	upstream_gene_variant	4,469323864
X2R_10721962_SNP	3,40E-05	44	20	52	21	0,181422666	2R:14834457	CG10205	downstream_gene_variant	4,468494771
X3L_4698954_SNP	3,40E-05	29	38	27	51	0,181422666	3L:4698954	CG13713	downstream_gene_variant	4,467980978
X3L_4698954_SNP	3,40E-05	29	38	27	51	0,181422666	3L:4698954	CG15876	upstream_gene_variant	4,467980978
X3L_4698954_SNP	3,40E-05	29	38	27	51	0,181422666	3L:4698954	CR43879	upstream_gene_variant	4,467980978
X3L_4698954_SNP	3,40E-05	29	38	27	51	0,181422666	3L:4698954	RhoGEF64C	intron_variant	4,467980978	RhoGEF64C
X2R_11628488_SNP	3,41E-05	1	66	5	74	0,181422666	2R:15740983	CG30089	intron_variant	4,4678473	CG30089
X2R_15275625_SNP	3,42E-05	67	75	5	NA	0,181422666	2R:19388120	CG10081	missense_variant	4,466024692	CG10081
X2R_15275625_SNP	3,42E-05	67	75	5	NA	0,181422666	2R:19388120	CG10073	downstream_gene_variant	4,466024692
X2R_15275625_SNP	3,42E-05	67	75	5	NA	0,181422666	2R:19388120	CG11257	upstream_gene_variant	4,466024692
X2R_15275625_SNP	3,42E-05	67	75	5	NA	0,181422666	2R:19388120	SdhA	downstream_gene_variant	4,466024692
X2R_15331939_SNP	3,42E-05	67	75	5	NA	0,181422666	2R:19444434	Arl6	intron_variant	4,466024692	Arl6
X2R_15331939_SNP	3,42E-05	67	75	5	NA	0,181422666	2R:19444434	betaTub56D	downstream_gene_variant	4,466024692
X2R_15331939_SNP	3,42E-05	67	75	5	NA	0,181422666	2R:19444434	EloC	downstream_gene_variant	4,466024692
X2R_15331939_SNP	3,42E-05	67	75	5	NA	0,181422666	2R:19444434	RpL11	downstream_gene_variant	4,466024692
X2R_15331939_SNP	3,42E-05	67	75	5	NA	0,181422666	2R:19444434	snoRNA:Psi28S-2444	downstream_gene_variant	4,466024692
X2R_15331939_SNP	3,42E-05	67	75	5	NA	0,181422666	2R:19444434	Spt5	downstream_gene_variant	4,466024692
X2R_15360785_SNP	3,42E-05	67	75	5	NA	0,181422666	2R:19473280	par-1	intron_variant	4,466024692	par-1
X2L_17104850_INS	3,42E-05	58	6	71	8	0,181422666	2L:17104850	CR45448	upstream_gene_variant	4,465856066
X3L_15762502_SNP	3,46E-05	54	10	64	9	0,182160817	3L:15769402	-	intergenic_variant	4,460839686
X2L_13154467_SNP	3,46E-05	64	2	68	9	0,182160817	2L:13154467	Pk34A	upstream_gene_variant	4,460484056
X2R_10321097_SNP	3,46E-05	17	49	18	62	0,182160817	2R:14433592	CR45277	non_coding_transcript_exon_variant	4,460417352	CR45277
X2R_10321097_SNP	3,46E-05	17	49	18	62	0,182160817	2R:14433592	Oaz	upstream_gene_variant	4,460417352
X2R_10321097_SNP	3,46E-05	17	49	18	62	0,182160817	2R:14433592	phyl	upstream_gene_variant	4,460417352
X2L_19912451_SNP	3,49E-05	15	48	12	62	0,183216652	2L:19912451	CR43097	upstream_gene_variant	4,456689156
X2L_19912451_SNP	3,49E-05	15	48	12	62	0,183216652	2L:19912451	sick	intron_variant	4,456689156	sick
X2L_19912451_SNP	3,49E-05	15	48	12	62	0,183216652	2L:19912451	TotF	upstream_gene_variant	4,456689156
X2L_19912451_SNP	3,49E-05	15	48	12	62	0,183216652	2L:19912451	Victoria	downstream_gene_variant	4,456689156
X2R_10873206_SNP	3,53E-05	12	55	18	61	0,184706973	2R:14985701	CG7639	downstream_gene_variant	4,45184825
X2R_10873206_SNP	3,53E-05	12	55	18	61	0,184706973	2R:14985701	ckn	downstream_gene_variant	4,45184825
X2R_10873206_SNP	3,53E-05	12	55	18	61	0,184706973	2R:14985701	pcs	intron_variant	4,45184825	pcs
X2R_10873206_SNP	3,53E-05	12	55	18	61	0,184706973	2R:14985701	tRNA:CR30241	upstream_gene_variant	4,45184825
X2R_10700192_SNP	3,54E-05	6	61	7	73	0,184706973	2R:14812687	hui	downstream_gene_variant	4,450744577
X_16159941_MNP	3,57E-05	60	2	72	6	0,185260146	X:16265908	CG12507	intron_variant	4,44730271	CG12507
X_16159941_MNP	3,57E-05	60	2	72	6	0,185260146	X:16265908	kat80	downstream_gene_variant	4,44730271
X2L_19926965_SNP	3,58E-05	51	12	63	11	0,185260146	2L:19926965	CR43827	downstream_gene_variant	4,446451315
X2L_19926965_SNP	3,58E-05	51	12	63	11	0,185260146	2L:19926965	sick	intron_variant	4,446451315	sick
X2L_4376248_SNP	3,58E-05	40	22	44	32	0,185260146	2L:4376248	CG17612	downstream_gene_variant	4,445831743
X2L_4376248_SNP	3,58E-05	40	22	44	32	0,185260146	2L:4376248	Traf4	intron_variant	4,445831743	Traf4
X2L_17076983_SNP	3,62E-05	60	6	68	9	0,186797565	2L:17076983	-	intergenic_variant	4,44104448
X2L_19912397_SNP	3,64E-05	44	20	62	14	0,18695815	2L:19912397	CR43097	upstream_gene_variant	4,439294554
X2L_19912397_SNP	3,64E-05	44	20	62	14	0,18695815	2L:19912397	sick	intron_variant	4,439294554	sick
X2L_19912397_SNP	3,64E-05	44	20	62	14	0,18695815	2L:19912397	TotF	upstream_gene_variant	4,439294554
X2L_19912397_SNP	3,64E-05	44	20	62	14	0,18695815	2L:19912397	Victoria	downstream_gene_variant	4,439294554
X2R_14706592_SNP	3,65E-05	62	5	70	8	0,18695815	2R:18819087	CG15096	upstream_gene_variant	4,437648599
X2R_14706592_SNP	3,65E-05	62	5	70	8	0,18695815	2R:18819087	CG15097	downstream_gene_variant	4,437648599
X2R_14706592_SNP	3,65E-05	62	5	70	8	0,18695815	2R:18819087	CR43418	downstream_gene_variant	4,437648599
X2R_14706592_SNP	3,65E-05	62	5	70	8	0,18695815	2R:18819087	Phb2	upstream_gene_variant	4,437648599
X_21057904_INS	3,66E-05	19	44	33	43	0,18695815	X:21186877	CR45506	upstream_gene_variant	4,436987874
X3R_5289835_SNP	3,68E-05	2	62	5	75	0,18695815	3R:9464113	CG16779	3_prime_UTR_variant	4,434551255	CG16779
X3R_5289835_SNP	3,68E-05	2	62	5	75	0,18695815	3R:9464113	GstZ2	upstream_gene_variant	4,434551255
X2R_10171174_SNP	3,68E-05	1	61	6	68	0,18695815	2R:14283669	Ih	intron_variant	4,434115362	Ih
X2R_10171174_SNP	3,68E-05	1	61	6	68	0,18695815	2R:14283669	Ih	upstream_gene_variant	4,434115362
X3L_8326773_SNP	3,69E-05	7	60	11	64	0,18695815	3L:8333673	CG34462	downstream_gene_variant	4,433551547
X3L_8326773_SNP	3,69E-05	7	60	11	64	0,18695815	3L:8333673	Cpr66Cb	upstream_gene_variant	4,433551547
X2L_8182913_SNP	3,70E-05	1	54	6	55	0,187171828	2L:8182913	Piezo	downstream_gene_variant	4,431879861
X2L_8182913_SNP	3,70E-05	1	54	6	55	0,187171828	2L:8182913	Piezo	intron_variant	4,431879861	Piezo
X2R_10182635_SNP	3,71E-05	44	20	47	32	0,187171828	2R:14295130	Ih	3_prime_UTR_variant	4,430707923	Ih
X2R_10182635_SNP	3,71E-05	44	20	47	32	0,187171828	2R:14295130	Ih	downstream_gene_variant	4,430707923
X2R_10182635_SNP	3,71E-05	44	20	47	32	0,187171828	2R:14295130	Ih	intron_variant	4,430707923	Ih
X2R_10182635_SNP	3,71E-05	44	20	47	32	0,187171828	2R:14295130	tej	downstream_gene_variant	4,430707923
X2R_15060790_DEL	3,73E-05	58	8	65	13	0,187794719	2R:19173285	CG10737	intron_variant	4,427892801	CG10737
X2L_16915649_SNP	3,74E-05	44	20	62	13	0,187794719	2L:16915649	tweek	intron_variant	4,426930108	tweek
X2R_10886102_SNP	3,77E-05	5	16	6	18	0,188705257	2R:14998597	CG10265	upstream_gene_variant	4,423666714
X2R_10886102_SNP	3,77E-05	5	16	6	18	0,188705257	2R:14998597	CR43830	downstream_gene_variant	4,423666714
X2L_17999677_SNP	3,84E-05	6	59	10	67	0,191708165	2L:17999677	CR44604	upstream_gene_variant	4,415231422
X2L_17999677_SNP	3,84E-05	6	59	10	67	0,191708165	2L:17999677	CR44605	upstream_gene_variant	4,415231422
X2R_10104375_SNP	3,86E-05	52	9	59	19	0,191708165	2R:14216870	CG8468	upstream_gene_variant	4,413714218
X2R_10104375_SNP	3,86E-05	52	9	59	19	0,191708165	2R:14216870	mir-308	upstream_gene_variant	4,413714218
X2R_10104375_SNP	3,86E-05	52	9	59	19	0,191708165	2R:14216870	RpS23	upstream_gene_variant	4,413714218
X2R_10104375_SNP	3,86E-05	52	9	59	19	0,191708165	2R:14216870	Sox15	upstream_gene_variant	4,413714218
X_19870053_SNP	3,86E-05	34	21	42	27	0,191708165	X:19976020	-	intergenic_variant	4,413340356
X3R_17326166_SNP	3,89E-05	8	55	8	67	0,192419612	3R:21500444	C15	intron_variant	4,409903389	C15
X3R_17326166_SNP	3,89E-05	8	55	8	67	0,192419612	3R:21500444	CR44032	upstream_gene_variant	4,409903389
X2R_10254237_SNP	3,92E-05	56	9	71	7	0,192419612	2R:14366732	Arc2	downstream_gene_variant	4,406654997
X2R_10254237_SNP	3,92E-05	56	9	71	7	0,192419612	2R:14366732	CG34184	downstream_gene_variant	4,406654997
X2R_10254237_SNP	3,92E-05	56	9	71	7	0,192419612	2R:14366732	CG34442	upstream_gene_variant	4,406654997
X2R_10254237_SNP	3,92E-05	56	9	71	7	0,192419612	2R:14366732	CG34443	upstream_gene_variant	4,406654997
X2R_10254237_SNP	3,92E-05	56	9	71	7	0,192419612	2R:14366732	CG34444	upstream_gene_variant	4,406654997
X2R_10254237_SNP	3,92E-05	56	9	71	7	0,192419612	2R:14366732	CR10102	upstream_gene_variant	4,406654997
X2R_10254237_SNP	3,92E-05	56	9	71	7	0,192419612	2R:14366732	Obp50a	downstream_gene_variant	4,406654997
X2R_10254237_SNP	3,92E-05	56	9	71	7	0,192419612	2R:14366732	Obp50b	upstream_gene_variant	4,406654997
X2R_10254237_SNP	3,92E-05	56	9	71	7	0,192419612	2R:14366732	Obp50c	upstream_gene_variant	4,406654997
X2R_10254237_SNP	3,92E-05	56	9	71	7	0,192419612	2R:14366732	Tfb1	downstream_gene_variant	4,406654997
X2L_9252480_SNP	3,94E-05	67	72	8	NA	0,192419612	2L:9252480	aust	upstream_gene_variant	4,404782963
X2L_9252480_SNP	3,94E-05	67	72	8	NA	0,192419612	2L:9252480	borr	intron_variant	4,404782963	borr
X2L_9252480_SNP	3,94E-05	67	72	8	NA	0,192419612	2L:9252480	CR43734	upstream_gene_variant	4,404782963
X2L_9252480_SNP	3,94E-05	67	72	8	NA	0,192419612	2L:9252480	Ggamma30A	upstream_gene_variant	4,404782963
X2L_9252480_SNP	3,94E-05	67	72	8	NA	0,192419612	2L:9252480	lectin-30A	downstream_gene_variant	4,404782963
X2L_9252480_SNP	3,94E-05	67	72	8	NA	0,192419612	2L:9252480	tai	downstream_gene_variant	4,404782963
X2L_9252499_SNP	3,94E-05	67	72	8	NA	0,192419612	2L:9252499	aust	upstream_gene_variant	4,404782963
X2L_9252499_SNP	3,94E-05	67	72	8	NA	0,192419612	2L:9252499	borr	intron_variant	4,404782963	borr
X2L_9252499_SNP	3,94E-05	67	72	8	NA	0,192419612	2L:9252499	CR43734	upstream_gene_variant	4,404782963
X2L_9252499_SNP	3,94E-05	67	72	8	NA	0,192419612	2L:9252499	Ggamma30A	upstream_gene_variant	4,404782963
X2L_9252499_SNP	3,94E-05	67	72	8	NA	0,192419612	2L:9252499	lectin-30A	downstream_gene_variant	4,404782963
X2L_9252499_SNP	3,94E-05	67	72	8	NA	0,192419612	2L:9252499	tai	downstream_gene_variant	4,404782963
X2L_9255723_SNP	3,94E-05	67	8	72	NA	0,192419612	2L:9255723	aust	upstream_gene_variant	4,404782963
X2L_9255723_SNP	3,94E-05	67	8	72	NA	0,192419612	2L:9255723	borr	upstream_gene_variant	4,404782963
X2L_9255723_SNP	3,94E-05	67	8	72	NA	0,192419612	2L:9255723	CR43734	upstream_gene_variant	4,404782963
X2L_9255723_SNP	3,94E-05	67	8	72	NA	0,192419612	2L:9255723	Ggamma30A	upstream_gene_variant	4,404782963
X2L_9255723_SNP	3,94E-05	67	8	72	NA	0,192419612	2L:9255723	lectin-30A	upstream_gene_variant	4,404782963
X_8730680_DEL	3,94E-05	23	39	26	49	0,192419612	X:8836647	CG12075	upstream_gene_variant	4,404079721
X_8730680_DEL	3,94E-05	23	39	26	49	0,192419612	X:8836647	CR45537	non_coding_transcript_exon_variant	4,404079721	CR45537
X3L_19851504_SNP	3,96E-05	46	19	62	12	0,192419612	3L:19858404	Papss	synonymous_variant	4,401967818	Papss
X3L_19851504_SNP	3,96E-05	46	19	62	12	0,192419612	3L:19858404	CR45433	upstream_gene_variant	4,401967818
X_6086311_SNP	3,97E-05	60	5	72	8	0,192419612	X:6192278	Ca-alpha1T	intron_variant	4,401352714	Ca-alpha1T
X_6086311_SNP	3,97E-05	60	5	72	8	0,192419612	X:6192278	CG32750	downstream_gene_variant	4,401352714
X_6086311_SNP	3,97E-05	60	5	72	8	0,192419612	X:6192278	CG32751	downstream_gene_variant	4,401352714
X2L_9253529_SNP	3,98E-05	63	8	71	NA	0,192419612	2L:9253529	aust	upstream_gene_variant	4,399863954
X2L_9253529_SNP	3,98E-05	63	8	71	NA	0,192419612	2L:9253529	borr	upstream_gene_variant	4,399863954
X2L_9253529_SNP	3,98E-05	63	8	71	NA	0,192419612	2L:9253529	CR43734	upstream_gene_variant	4,399863954
X2L_9253529_SNP	3,98E-05	63	8	71	NA	0,192419612	2L:9253529	Ggamma30A	upstream_gene_variant	4,399863954
X2L_9253529_SNP	3,98E-05	63	8	71	NA	0,192419612	2L:9253529	lectin-30A	downstream_gene_variant	4,399863954
X2L_9253529_SNP	3,98E-05	63	8	71	NA	0,192419612	2L:9253529	tai	downstream_gene_variant	4,399863954
X2R_6752884_SNP	3,98E-05	7	59	10	67	0,192419612	2R:10865379	CG30015	intron_variant	4,399674784	CG30015
X2R_6752884_SNP	3,98E-05	7	59	10	67	0,192419612	2R:10865379	CG30015	upstream_gene_variant	4,399674784
X2L_9252708_SNP	3,99E-05	66	8	72	NA	0,192419612	2L:9252708	borr	synonymous_variant	4,399241257	borr
X2L_9252708_SNP	3,99E-05	66	8	72	NA	0,192419612	2L:9252708	aust	upstream_gene_variant	4,399241257
X2L_9252708_SNP	3,99E-05	66	8	72	NA	0,192419612	2L:9252708	CR43734	upstream_gene_variant	4,399241257
X2L_9252708_SNP	3,99E-05	66	8	72	NA	0,192419612	2L:9252708	Ggamma30A	upstream_gene_variant	4,399241257
X2L_9252708_SNP	3,99E-05	66	8	72	NA	0,192419612	2L:9252708	lectin-30A	downstream_gene_variant	4,399241257
X2L_9252708_SNP	3,99E-05	66	8	72	NA	0,192419612	2L:9252708	tai	downstream_gene_variant	4,399241257
X_12381581_DEL	4,03E-05	52	12	69	10	0,193806486	X:12487548	Cpr11A	intron_variant	4,394334197	Cpr11A
X_12381581_DEL	4,03E-05	52	12	69	10	0,193806486	X:12487548	Lsp1alpha	upstream_gene_variant	4,394334197
X3R_18318872_SNP	4,04E-05	1	66	5	73	0,193806486	3R:22493150	CG5376	upstream_gene_variant	4,393889401
X3R_18318872_SNP	4,04E-05	1	66	5	73	0,193806486	3R:22493150	CG7045	downstream_gene_variant	4,393889401
X3R_18318872_SNP	4,04E-05	1	66	5	73	0,193806486	3R:22493150	CG7046	intron_variant	4,393889401	CG7046
X3R_18318872_SNP	4,04E-05	1	66	5	73	0,193806486	3R:22493150	CG7046	upstream_gene_variant	4,393889401
X3R_18318872_SNP	4,04E-05	1	66	5	73	0,193806486	3R:22493150	Octbeta1R	upstream_gene_variant	4,393889401
X3R_18318872_SNP	4,04E-05	1	66	5	73	0,193806486	3R:22493150	T-cp1	upstream_gene_variant	4,393889401
X_3172104_SNP	4,09E-05	6	60	2	78	0,194228275	X:3278071	dnc	intron_variant	4,388644883	dnc
X2R_13192472_SNP	4,09E-05	30	35	28	49	0,194228275	2R:17304967	CR43661	downstream_gene_variant	4,388290178
X2R_13192472_SNP	4,09E-05	30	35	28	49	0,194228275	2R:17304967	mbl	intron_variant	4,388290178	mbl
X2L_9254412_SNP	4,10E-05	66	8	72	NA	0,194228275	2L:9254412	lectin-30A	synonymous_variant	4,387141155	lectin-30A
X2L_9254412_SNP	4,10E-05	66	8	72	NA	0,194228275	2L:9254412	aust	upstream_gene_variant	4,387141155
X2L_9254412_SNP	4,10E-05	66	8	72	NA	0,194228275	2L:9254412	borr	upstream_gene_variant	4,387141155
X2L_9254412_SNP	4,10E-05	66	8	72	NA	0,194228275	2L:9254412	CR43734	upstream_gene_variant	4,387141155
X2L_9254412_SNP	4,10E-05	66	8	72	NA	0,194228275	2L:9254412	Ggamma30A	upstream_gene_variant	4,387141155
X2L_9254412_SNP	4,10E-05	66	8	72	NA	0,194228275	2L:9254412	tai	downstream_gene_variant	4,387141155
X3L_19857819_SNP	4,10E-05	45	17	59	12	0,194228275	3L:19864719	CR45433	downstream_gene_variant	4,387003709
X3L_19857819_SNP	4,10E-05	45	17	59	12	0,194228275	3L:19864719	Papss	downstream_gene_variant	4,387003709
X3L_19857819_SNP	4,10E-05	45	17	59	12	0,194228275	3L:19864719	Rab8	downstream_gene_variant	4,387003709
X2L_17999674_SNP	4,11E-05	6	60	10	66	0,194228275	2L:17999674	CR44604	upstream_gene_variant	4,386089711
X2L_17999674_SNP	4,11E-05	6	60	10	66	0,194228275	2L:17999674	CR44605	upstream_gene_variant	4,386089711
X2R_13191066_SNP	4,12E-05	41	26	56	22	0,194228275	2R:17303561	CR43661	downstream_gene_variant	4,384810471
X2R_13191066_SNP	4,12E-05	41	26	56	22	0,194228275	2R:17303561	mbl	intron_variant	4,384810471	mbl
X2L_18536512_SNP	4,16E-05	5	59	6	70	0,194228275	2L:18536512	CG10211	downstream_gene_variant	4,38101275
X2L_18536512_SNP	4,16E-05	5	59	6	70	0,194228275	2L:18536512	Pde11	intron_variant	4,38101275	Pde11
X2R_10366370_SNP	4,17E-05	53	12	59	18	0,194228275	2R:14478865	CR44462	downstream_gene_variant	4,379390229
X2R_10366370_SNP	4,17E-05	53	12	59	18	0,194228275	2R:14478865	L	upstream_gene_variant	4,379390229
X2R_10309497_SNP	4,18E-05	23	42	31	46	0,194228275	2R:14421992	CG17386	synonymous_variant	4,378602575	CG17386
X2R_20942093_INS	4,19E-05	57	7	74	6	0,194228275	2R:25054570	gsb-n	upstream_gene_variant	4,37758287
X2R_10787494_SNP	4,20E-05	27	39	35	42	0,194228275	2R:14899989	Cyp317a1	synonymous_variant	4,376883293	Cyp317a1
X2R_10787494_SNP	4,20E-05	27	39	35	42	0,194228275	2R:14899989	CG10249	downstream_gene_variant	4,376883293
X2R_15059588_SNP	4,20E-05	6	61	13	67	0,194228275	2R:19172083	CG10737	intron_variant	4,376333574	CG10737
X2L_9253421_MNP	4,21E-05	64	69	8	NA	0,194228275	2L:9253421	aust	upstream_gene_variant	4,375545871
X2L_9253421_MNP	4,21E-05	64	69	8	NA	0,194228275	2L:9253421	borr	upstream_gene_variant	4,375545871
X2L_9253421_MNP	4,21E-05	64	69	8	NA	0,194228275	2L:9253421	CR43734	upstream_gene_variant	4,375545871
X2L_9253421_MNP	4,21E-05	64	69	8	NA	0,194228275	2L:9253421	Ggamma30A	upstream_gene_variant	4,375545871
X2L_9253421_MNP	4,21E-05	64	69	8	NA	0,194228275	2L:9253421	lectin-30A	downstream_gene_variant	4,375545871
X2L_9253421_MNP	4,21E-05	64	69	8	NA	0,194228275	2L:9253421	tai	downstream_gene_variant	4,375545871
X2L_9253428_INS	4,21E-05	64	8	69	NA	0,194228275	2L:9253428	aust	upstream_gene_variant	4,375545871
X2L_9253428_INS	4,21E-05	64	8	69	NA	0,194228275	2L:9253428	borr	upstream_gene_variant	4,375545871
X2L_9253428_INS	4,21E-05	64	8	69	NA	0,194228275	2L:9253428	CR43734	upstream_gene_variant	4,375545871
X2L_9253428_INS	4,21E-05	64	8	69	NA	0,194228275	2L:9253428	Ggamma30A	upstream_gene_variant	4,375545871
X2L_9253428_INS	4,21E-05	64	8	69	NA	0,194228275	2L:9253428	lectin-30A	downstream_gene_variant	4,375545871
X2L_9253428_INS	4,21E-05	64	8	69	NA	0,194228275	2L:9253428	tai	downstream_gene_variant	4,375545871
X2R_10151361_SNP	4,22E-05	25	41	38	37	0,194228275	2R:14263856	CG8547	splice_region_variant,intron_variant	4,374174315	CG8547
X2R_10151361_SNP	4,22E-05	25	41	38	37	0,194228275	2R:14263856	beta4GalNAcTA	downstream_gene_variant	4,374174315
X2R_10151361_SNP	4,22E-05	25	41	38	37	0,194228275	2R:14263856	SelD	downstream_gene_variant	4,374174315
X2L_19908906_INS	4,23E-05	42	18	49	24	0,194228275	2L:19908906	CR43097	downstream_gene_variant	4,373335521
X2L_19908906_INS	4,23E-05	42	18	49	24	0,194228275	2L:19908906	sick	intron_variant	4,373335521	sick
X2L_19908906_INS	4,23E-05	42	18	49	24	0,194228275	2L:19908906	TotF	downstream_gene_variant	4,373335521
X2L_19908906_INS	4,23E-05	42	18	49	24	0,194228275	2L:19908906	Victoria	downstream_gene_variant	4,373335521
X2L_9262205_SNP	4,24E-05	2	64	7	70	0,194228275	2L:9262205	CR45262	non_coding_transcript_exon_variant	4,37311654	CR45262
X2L_9262205_SNP	4,24E-05	2	64	7	70	0,194228275	2L:9262205	Ggamma30A	intron_variant	4,37311654	Ggamma30A
X2R_10225719_SNP	4,25E-05	67	74	6	NA	0,194228275	2R:14338214	Shroom	intron_variant	4,372048446	Shroom
X2R_10225719_SNP	4,25E-05	67	74	6	NA	0,194228275	2R:14338214	Shroom	upstream_gene_variant	4,372048446
X2L_12325688_SNP	4,25E-05	52	11	61	13	0,194228275	2L:12325688	-	intergenic_variant	4,371555279
X2R_10584445_SNP	4,26E-05	11	55	13	64	0,194228275	2R:14696940	mspo	intron_variant	4,370382886	mspo
X2L_16915637_SNP	4,27E-05	44	20	61	13	0,194228275	2L:16915637	tweek	intron_variant	4,36963824	tweek
X2L_9253430_SNP	4,27E-05	63	8	69	NA	0,194228275	2L:9253430	aust	upstream_gene_variant	4,369112647
X2L_9253430_SNP	4,27E-05	63	8	69	NA	0,194228275	2L:9253430	borr	upstream_gene_variant	4,369112647
X2L_9253430_SNP	4,27E-05	63	8	69	NA	0,194228275	2L:9253430	CR43734	upstream_gene_variant	4,369112647
X2L_9253430_SNP	4,27E-05	63	8	69	NA	0,194228275	2L:9253430	Ggamma30A	upstream_gene_variant	4,369112647
X2L_9253430_SNP	4,27E-05	63	8	69	NA	0,194228275	2L:9253430	lectin-30A	downstream_gene_variant	4,369112647
X2L_9253430_SNP	4,27E-05	63	8	69	NA	0,194228275	2L:9253430	tai	downstream_gene_variant	4,369112647
X2L_1525709_SNP	4,29E-05	14	48	22	54	0,19446099	2L:1525709	Or22a	downstream_gene_variant	4,367539772
X2L_1525709_SNP	4,29E-05	14	48	22	54	0,19446099	2L:1525709	Or22b	downstream_gene_variant	4,367539772
X2L_21941200_SNP	4,31E-05	12	35	12	50	0,194884897	2L:21941200	-	intergenic_variant	4,36554379
X_14613125_SNP	4,32E-05	66	1	73	5	0,194965233	X:14719092	hog	upstream_gene_variant	4,364317046
X_14613125_SNP	4,32E-05	66	1	73	5	0,194965233	X:14719092	NetB	intron_variant	4,364317046	NetB
X2R_13191053_SNP	4,36E-05	28	32	22	43	0,195902314	2R:17303548	CR43661	downstream_gene_variant	4,360142029
X2R_13191053_SNP	4,36E-05	28	32	22	43	0,195902314	2R:17303548	mbl	intron_variant	4,360142029	mbl
X_17250796_SNP	4,36E-05	50	17	62	14	0,195902314	X:17356763	-	intergenic_variant	4,360113964
X2L_9259902_DEL	4,37E-05	2	62	7	71	0,195902314	2L:9259902	CR45262	downstream_gene_variant	4,359062743
X2L_9259902_DEL	4,37E-05	2	62	7	71	0,195902314	2L:9259902	Ggamma30A	intron_variant	4,359062743	Ggamma30A
X3R_25403289_SNP	4,38E-05	50	13	57	17	0,195902314	3R:29577567	-	intergenic_variant	4,358067643
X2L_9080906_SNP	4,40E-05	61	5	69	10	0,195902314	2L:9080906	CG12439	downstream_gene_variant	4,356934215
X2L_9080906_SNP	4,40E-05	61	5	69	10	0,195902314	2L:9080906	Toll-4	upstream_gene_variant	4,356934215
X2L_21613986_SNP	4,41E-05	2	63	7	69	0,195902314	2L:21613986	CG2201	downstream_gene_variant	4,356000654
X3L_3213608_SNP	4,43E-05	33	29	44	34	0,196541171	3L:3213608	CG14967	intron_variant	4,353167779	CG14967
X3L_3213608_SNP	4,43E-05	33	29	44	34	0,196541171	3L:3213608	CG32269	upstream_gene_variant	4,353167779
X3L_3213608_SNP	4,43E-05	33	29	44	34	0,196541171	3L:3213608	CG32270	upstream_gene_variant	4,353167779
X3L_3213608_SNP	4,43E-05	33	29	44	34	0,196541171	3L:3213608	gry	downstream_gene_variant	4,353167779
X_17250812_SNP	4,48E-05	17	49	14	65	0,196541171	X:17356779	-	intergenic_variant	4,34824162
X2L_20500725_SNP	4,50E-05	47	14	55	19	0,196541171	2L:20500725	CG34007	downstream_gene_variant	4,346449254
X2R_11903268_SNP	4,51E-05	67	5	75	NA	0,196541171	2R:16015763	Rrp42	synonymous_variant	4,345790237	Rrp42
X2R_11903268_SNP	4,51E-05	67	5	75	NA	0,196541171	2R:16015763	CG8388	upstream_gene_variant	4,345790237
X2R_11903268_SNP	4,51E-05	67	5	75	NA	0,196541171	2R:16015763	CG8389	downstream_gene_variant	4,345790237
X2R_11903268_SNP	4,51E-05	67	5	75	NA	0,196541171	2R:16015763	CG8397	downstream_gene_variant	4,345790237
X2R_11903268_SNP	4,51E-05	67	5	75	NA	0,196541171	2R:16015763	CG8399	upstream_gene_variant	4,345790237
X2R_11903268_SNP	4,51E-05	67	5	75	NA	0,196541171	2R:16015763	Prosbeta1	upstream_gene_variant	4,345790237
X2L_17999622_SNP	4,54E-05	58	6	67	10	0,196541171	2L:17999622	CR44604	upstream_gene_variant	4,342782417
X2L_17999622_SNP	4,54E-05	58	6	67	10	0,196541171	2L:17999622	CR44605	upstream_gene_variant	4,342782417
X2R_15044697_INS	4,55E-05	63	3	69	8	0,196541171	2R:19157192	ena	intron_variant	4,342385472	e
X2R_15894051_SNP	4,56E-05	18	46	25	52	0,196541171	2R:20006546	CG16898	upstream_gene_variant	4,341354138
X2R_15894051_SNP	4,56E-05	18	46	25	52	0,196541171	2R:20006546	CR44628	upstream_gene_variant	4,341354138
X2R_20193007_INS	4,57E-05	57	6	73	3	0,196541171	2R:24305484	betaTub60D	upstream_gene_variant	4,339990679
X2R_14706601_DEL	4,58E-05	30	36	30	46	0,196541171	2R:18819096	CG15096	upstream_gene_variant	4,338701865
X2R_14706601_DEL	4,58E-05	30	36	30	46	0,196541171	2R:18819096	CG15097	downstream_gene_variant	4,338701865
X2R_14706601_DEL	4,58E-05	30	36	30	46	0,196541171	2R:18819096	CR43418	downstream_gene_variant	4,338701865
X2R_14706601_DEL	4,58E-05	30	36	30	46	0,196541171	2R:18819096	Phb2	upstream_gene_variant	4,338701865
X2R_12198042_SNP	4,59E-05	63	4	70	8	0,196541171	2R:16310537	CR45232	upstream_gene_variant	4,337864694
X2R_12198042_SNP	4,59E-05	63	4	70	8	0,196541171	2R:16310537	Nox	intron_variant	4,337864694	Nox
X2R_11480869_SNP	4,60E-05	2	60	5	67	0,196541171	2R:15593364	-	intergenic_variant	4,336833086
X2R_10218404_SNP	4,61E-05	46	21	46	30	0,196541171	2R:14330899	Shroom	intron_variant	4,336342883	Shroom
X2R_10218404_SNP	4,61E-05	46	21	46	30	0,196541171	2R:14330899	Shroom	upstream_gene_variant	4,336342883
X2R_7989757_SNP	4,62E-05	61	4	74	6	0,196541171	2R:12102252	jeb	intron_variant	4,335540147	jeb
X2L_8281437_SNP	4,62E-05	1	65	5	73	0,196541171	2L:8281437	Btk29A	intron_variant	4,335234616	Btk29A
X2L_8281437_SNP	4,62E-05	1	65	5	73	0,196541171	2L:8281437	Btk29A	upstream_gene_variant	4,335234616
X_9392108_SNP	4,62E-05	4	62	6	74	0,196541171	X:9498075	CG32700	downstream_gene_variant	4,334969401
X_9392108_SNP	4,62E-05	4	62	6	74	0,196541171	X:9498075	mgl	intron_variant	4,334969401	mgl
X_9392108_SNP	4,62E-05	4	62	6	74	0,196541171	X:9498075	mgl	upstream_gene_variant	4,334969401
X2R_10951820_SNP	4,63E-05	11	54	13	67	0,196541171	2R:15064315	-	intergenic_variant	4,334865821
X3L_14852455_SNP	4,63E-05	59	7	74	4	0,196541171	3L:14859355	CG17839	intron_variant	4,33470097	CG17839
X2R_15044703_SNP	4,65E-05	3	64	8	69	0,196541171	2R:19157198	ena	intron_variant	4,332511745	e
X2R_14053124_SNP	4,67E-05	10	54	12	64	0,196541171	2R:18165619	Nup75	synonymous_variant	4,33095308	Nup75
X2R_14053124_SNP	4,67E-05	10	54	12	64	0,196541171	2R:18165619	CG10915	downstream_gene_variant	4,33095308
X2R_14053124_SNP	4,67E-05	10	54	12	64	0,196541171	2R:18165619	CG42518	upstream_gene_variant	4,33095308
X2R_14053124_SNP	4,67E-05	10	54	12	64	0,196541171	2R:18165619	Dgp-1	downstream_gene_variant	4,33095308
X2R_14053124_SNP	4,67E-05	10	54	12	64	0,196541171	2R:18165619	MED9	upstream_gene_variant	4,33095308
X2L_6832995_SNP	4,67E-05	66	1	73	6	0,196541171	2L:6832995	sens-2	intron_variant	4,330863664	sens-2
X2R_10428874_SNP	4,67E-05	1	55	5	50	0,196541171	2R:14541369	CG30076	downstream_gene_variant	4,330377826
X2R_10428874_SNP	4,67E-05	1	55	5	50	0,196541171	2R:14541369	ttv	intron_variant	4,330377826	ttv
X2R_7474789_SNP	4,68E-05	4	58	9	69	0,196541171	2R:11587284	snoRNA:Psi28S-1180	downstream_gene_variant	4,329412877
X2R_7474789_SNP	4,68E-05	4	58	9	69	0,196541171	2R:11587284	snoRNA:Psi28S-1936	downstream_gene_variant	4,329412877
X2R_7474789_SNP	4,68E-05	4	58	9	69	0,196541171	2R:11587284	tou	intron_variant	4,329412877	tou
X2R_7474789_SNP	4,68E-05	4	58	9	69	0,196541171	2R:11587284	tou	upstream_gene_variant	4,329412877
X2R_10647273_SNP	4,68E-05	4	62	5	70	0,196541171	2R:14759768	CG10151	upstream_gene_variant	4,329308389
X2R_10647273_SNP	4,68E-05	4	62	5	70	0,196541171	2R:14759768	CG12857	upstream_gene_variant	4,329308389
X2R_10647273_SNP	4,68E-05	4	62	5	70	0,196541171	2R:14759768	CG12859	downstream_gene_variant	4,329308389
X2R_10647273_SNP	4,68E-05	4	62	5	70	0,196541171	2R:14759768	Spred	3_prime_UTR_variant	4,329308389	Spred
X2R_10647273_SNP	4,68E-05	4	62	5	70	0,196541171	2R:14759768	Spred	downstream_gene_variant	4,329308389
X2R_10647273_SNP	4,68E-05	4	62	5	70	0,196541171	2R:14759768	Trs31	upstream_gene_variant	4,329308389
X2R_11608247_SNP	4,69E-05	10	57	10	68	0,196541171	2R:15720742	-	intergenic_variant	4,328793915
X3L_14194128_SNP	4,69E-05	59	7	76	4	0,196541171	3L:14201028	CG32141	upstream_gene_variant	4,328557127
X3L_14194128_SNP	4,69E-05	59	7	76	4	0,196541171	3L:14201028	nuf	intron_variant	4,328557127	nuf
X3L_14194128_SNP	4,69E-05	59	7	76	4	0,196541171	3L:14201028	nuf	upstream_gene_variant	4,328557127
X2R_10864330_SNP	4,69E-05	53	13	61	15	0,196541171	2R:14976825	ckn	intron_variant	4,328506324	ckn
X2R_10864330_SNP	4,69E-05	53	13	61	15	0,196541171	2R:14976825	pcs	upstream_gene_variant	4,328506324
X2R_7476356_SNP	4,70E-05	21	42	32	45	0,196541171	2R:11588851	tou	synonymous_variant	4,327590763	tou
X2R_7476356_SNP	4,70E-05	21	42	32	45	0,196541171	2R:11588851	snoRNA:Psi28S-1180	downstream_gene_variant	4,327590763
X2R_7476356_SNP	4,70E-05	21	42	32	45	0,196541171	2R:11588851	snoRNA:Psi28S-1936	upstream_gene_variant	4,327590763
X2R_13323944_SNP	4,76E-05	64	3	71	8	0,197675436	2R:17436439	CG18467	upstream_gene_variant	4,322244537
X2R_13323944_SNP	4,76E-05	64	3	71	8	0,197675436	2R:17436439	EDTP	intron_variant	4,322244537	EDTP
X2R_13323944_SNP	4,76E-05	64	3	71	8	0,197675436	2R:17436439	Lhr	downstream_gene_variant	4,322244537
X2R_13324067_SNP	4,76E-05	64	3	71	8	0,197675436	2R:17436562	CG18467	upstream_gene_variant	4,322244537
X2R_13324067_SNP	4,76E-05	64	3	71	8	0,197675436	2R:17436562	EDTP	intron_variant	4,322244537	EDTP
X2R_13324067_SNP	4,76E-05	64	3	71	8	0,197675436	2R:17436562	Lhr	downstream_gene_variant	4,322244537
X2R_13323986_SNP	4,78E-05	3	60	7	72	0,197675436	2R:17436481	CG18467	upstream_gene_variant	4,320903129
X2R_13323986_SNP	4,78E-05	3	60	7	72	0,197675436	2R:17436481	EDTP	intron_variant	4,320903129	EDTP
X2R_13323986_SNP	4,78E-05	3	60	7	72	0,197675436	2R:17436481	Lhr	downstream_gene_variant	4,320903129
X2L_4374778_SNP	4,79E-05	43	21	45	34	0,197675436	2L:4374778	Traf4	intron_variant	4,319299615	Traf4
X2R_7476394_INS	4,82E-05	37	21	41	32	0,197675436	2R:11588889	tou	inframe_insertion	4,316845212	tou
X2R_7476394_INS	4,82E-05	37	21	41	32	0,197675436	2R:11588889	snoRNA:Psi28S-1180	downstream_gene_variant	4,316845212
X2R_7476394_INS	4,82E-05	37	21	41	32	0,197675436	2R:11588889	snoRNA:Psi28S-1936	upstream_gene_variant	4,316845212
X2R_12368367_SNP	4,83E-05	7	59	6	72	0,197675436	2R:16480862	CG15712	downstream_gene_variant	4,316330169
X2L_17941897_SNP	4,83E-05	63	3	66	10	0,197675436	2L:17941897	CR44399	upstream_gene_variant	4,315713838
X2R_7476381_SNP	4,84E-05	22	42	32	46	0,197675436	2R:11588876	tou	missense_variant	4,314981224	tou
X2R_7476381_SNP	4,84E-05	22	42	32	46	0,197675436	2R:11588876	snoRNA:Psi28S-1180	downstream_gene_variant	4,314981224
X2R_7476381_SNP	4,84E-05	22	42	32	46	0,197675436	2R:11588876	snoRNA:Psi28S-1936	upstream_gene_variant	4,314981224
X2L_17541090_SNP	4,84E-05	16	44	11	67	0,197675436	2L:17541090	CR43304	upstream_gene_variant	4,314971717
X2L_2424990_SNP	4,84E-05	10	54	4	73	0,197675436	2L:2424990	CG44139	synonymous_variant	4,314906426	CG44139
X2L_2424990_SNP	4,84E-05	10	54	4	73	0,197675436	2L:2424990	CG34447	upstream_gene_variant	4,314906426
X2L_2424990_SNP	4,84E-05	10	54	4	73	0,197675436	2L:2424990	CG9886	downstream_gene_variant	4,314906426
X2L_2424990_SNP	4,84E-05	10	54	4	73	0,197675436	2L:2424990	CR44912	downstream_gene_variant	4,314906426
X2L_2424990_SNP	4,84E-05	10	54	4	73	0,197675436	2L:2424990	dpp	upstream_gene_variant	4,314906426
X3L_12886540_SNP	4,85E-05	31	31	48	25	0,197675436	3L:12893440	CG14118	synonymous_variant	4,314094156	CG14118
X3L_12886540_SNP	4,85E-05	31	31	48	25	0,197675436	3L:12893440	CG14120	downstream_gene_variant	4,314094156
X3L_12886540_SNP	4,85E-05	31	31	48	25	0,197675436	3L:12893440	CG43894	downstream_gene_variant	4,314094156
X3L_12886540_SNP	4,85E-05	31	31	48	25	0,197675436	3L:12893440	CR45748	upstream_gene_variant	4,314094156
X2L_709155_SNP	4,86E-05	58	6	69	10	0,197675436	2L:709155	CR44988	upstream_gene_variant	4,313611778
X2L_709155_SNP	4,86E-05	58	6	69	10	0,197675436	2L:709155	ds	intron_variant	4,313611778	ds
X2R_10787392_SNP	4,90E-05	54	11	69	9	0,198116234	2R:14899887	Cyp317a1	synonymous_variant	4,309798779	Cyp317a1
X2R_10787392_SNP	4,90E-05	54	11	69	9	0,198116234	2R:14899887	CG10249	downstream_gene_variant	4,309798779
X2L_19921570_SNP	4,91E-05	51	11	62	14	0,198116234	2L:19921570	CR43827	upstream_gene_variant	4,308663578
X2L_19921570_SNP	4,91E-05	51	11	62	14	0,198116234	2L:19921570	CR43828	non_coding_transcript_exon_variant	4,308663578	CR43828
X2L_19921570_SNP	4,91E-05	51	11	62	14	0,198116234	2L:19921570	sick	intron_variant	4,308663578	sick
X2R_12066229_SNP	4,92E-05	1	66	9	70	0,198116234	2R:16178724	Lis-1	upstream_gene_variant	4,308271529
X2R_12066229_SNP	4,92E-05	1	66	9	70	0,198116234	2R:16178724	Ptp52F	upstream_gene_variant	4,308271529
X2L_13870356_SNP	4,92E-05	1	63	5	72	0,198116234	2L:13870356	CenG1A	intron_variant	4,30795546	CenG1A
X2L_13870356_SNP	4,92E-05	1	63	5	72	0,198116234	2L:13870356	CR44848	upstream_gene_variant	4,30795546
X3L_5617182_SNP	4,93E-05	36	30	52	24	0,198116234	3L:5624082	-	intergenic_variant	4,306781931
X2L_9261424_SNP	4,94E-05	2	64	7	71	0,198116234	2L:9261424	CR45262	downstream_gene_variant	4,306323517
X2L_9261424_SNP	4,94E-05	2	64	7	71	0,198116234	2L:9261424	Ggamma30A	intron_variant	4,306323517	Ggamma30A
X2L_9252592_SNP	4,95E-05	67	72	7	NA	0,198116234	2L:9252592	aust	upstream_gene_variant	4,305572767
X2L_9252592_SNP	4,95E-05	67	72	7	NA	0,198116234	2L:9252592	borr	intron_variant	4,305572767	borr
X2L_9252592_SNP	4,95E-05	67	72	7	NA	0,198116234	2L:9252592	CR43734	upstream_gene_variant	4,305572767
X2L_9252592_SNP	4,95E-05	67	72	7	NA	0,198116234	2L:9252592	Ggamma30A	upstream_gene_variant	4,305572767
X2L_9252592_SNP	4,95E-05	67	72	7	NA	0,198116234	2L:9252592	lectin-30A	downstream_gene_variant	4,305572767
X2L_9252592_SNP	4,95E-05	67	72	7	NA	0,198116234	2L:9252592	tai	downstream_gene_variant	4,305572767
X_21217815_SNP	4,95E-05	59	8	72	8	0,198116234	X:21346788	dod	3_prime_UTR_variant	4,305156399	dod
X_21217815_SNP	4,95E-05	59	8	72	8	0,198116234	X:21346788	fliI	downstream_gene_variant	4,305156399
X_21217815_SNP	4,95E-05	59	8	72	8	0,198116234	X:21346788	pen	intron_variant	4,305156399	pen
X_21217815_SNP	4,95E-05	59	8	72	8	0,198116234	X:21346788	sol	upstream_gene_variant	4,305156399
X2L_22422421_SNP	4,99E-05	5	59	16	58	0,198650541	2L:22529689	RpL5	downstream_gene_variant	4,301752481
X3L_8552682_SNP	4,99E-05	60	7	71	5	0,198650541	3L:8559582	rhea	intron_variant	4,301676707	rhea
X3L_8552682_SNP	4,99E-05	60	7	71	5	0,198650541	3L:8559582	rhea	upstream_gene_variant	4,301676707
X2L_13962069_SNP	5,00E-05	7	59	7	70	0,198650541	2L:13962069	NimA	intron_variant	4,301211656	NimA
X2L_13962069_SNP	5,00E-05	7	59	7	70	0,198650541	2L:13962069	NimB1	upstream_gene_variant	4,301211656
X2L_13962069_SNP	5,00E-05	7	59	7	70	0,198650541	2L:13962069	NimB2	downstream_gene_variant	4,301211656
X2R_18312422_SNP	5,01E-05	43	22	65	13	0,198788016	2R:22424917	rad50	synonymous_variant	4,299766388	rad50
X2R_18312422_SNP	5,01E-05	43	22	65	13	0,198788016	2R:22424917	CG10344	downstream_gene_variant	4,299766388
X2R_18312422_SNP	5,01E-05	43	22	65	13	0,198788016	2R:22424917	mRpS29	upstream_gene_variant	4,299766388
X2R_18312422_SNP	5,01E-05	43	22	65	13	0,198788016	2R:22424917	ppk12	upstream_gene_variant	4,299766388
X3R_12581928_SNP	5,02E-05	64	1	72	5	0,198788016	3R:16756206	bxd	intron_variant,non_coding_transcript_variant	4,299070975	bxd
X3R_12581928_SNP	5,02E-05	64	1	72	5	0,198788016	3R:16756206	bxd	upstream_gene_variant	4,299070975
X3R_12581928_SNP	5,02E-05	64	1	72	5	0,198788016	3R:16756206	CG31275	upstream_gene_variant	4,299070975
X3R_25403106_SNP	5,04E-05	57	7	66	11	0,198915798	3R:29577384	-	intergenic_variant	4,297874697
X2R_10787579_SNP	5,06E-05	13	52	14	65	0,199400312	2R:14900074	Cyp317a1	synonymous_variant	4,295902872	Cyp317a1
X2R_10787579_SNP	5,06E-05	13	52	14	65	0,199400312	2R:14900074	CG10249	downstream_gene_variant	4,295902872
X3R_7858148_SNP	5,10E-05	53	12	54	16	0,200690917	3R:12032426	CG31358	upstream_gene_variant	4,292121499
X3R_7858148_SNP	5,10E-05	53	12	54	16	0,200690917	3R:12032426	CG42504	upstream_gene_variant	4,292121499
X3R_7858148_SNP	5,10E-05	53	12	54	16	0,200690917	3R:12032426	CG42505	upstream_gene_variant	4,292121499
X3R_7858148_SNP	5,10E-05	53	12	54	16	0,200690917	3R:12032426	ssp5	upstream_gene_variant	4,292121499
X2R_9631997_SNP	5,11E-05	48	15	46	29	0,200690917	2R:13744492	fas	intron_variant	4,291276219	fas
X2L_15382345_SNP	5,15E-05	44	15	50	22	0,20098342	2L:15382345	-	intergenic_variant	4,28812995
X2R_11438890_SNP	5,18E-05	2	63	11	67	0,20098342	2R:15551385	CG12963	upstream_gene_variant	4,286021171
X2R_11438890_SNP	5,18E-05	2	63	11	67	0,20098342	2R:15551385	CG8192	upstream_gene_variant	4,286021171
X2R_10151270_SNP	5,18E-05	24	41	37	40	0,20098342	2R:14263765	CG8547	synonymous_variant	4,285431025	CG8547
X2R_10151270_SNP	5,18E-05	24	41	37	40	0,20098342	2R:14263765	beta4GalNAcTA	downstream_gene_variant	4,285431025
X2R_10151270_SNP	5,18E-05	24	41	37	40	0,20098342	2R:14263765	CG8531	downstream_gene_variant	4,285431025
X2R_10151413_SNP	5,19E-05	31	35	40	38	0,20098342	2R:14263908	CG8547	synonymous_variant	4,28484737	CG8547
X2R_10151413_SNP	5,19E-05	31	35	40	38	0,20098342	2R:14263908	beta4GalNAcTA	downstream_gene_variant	4,28484737
X2R_10151413_SNP	5,19E-05	31	35	40	38	0,20098342	2R:14263908	SelD	downstream_gene_variant	4,28484737
X2R_13775901_SNP	5,19E-05	3	64	7	73	0,20098342	2R:17888396	PPO1	synonymous_variant	4,2846475	PPO1
X2R_13775901_SNP	5,19E-05	3	64	7	73	0,20098342	2R:17888396	Elk	intron_variant	4,2846475	Elk
X2R_10622234_SNP	5,20E-05	47	12	59	12	0,20098342	2R:14734729	CG12858	downstream_gene_variant	4,284040756
X2R_10622234_SNP	5,20E-05	47	12	59	12	0,20098342	2R:14734729	CR43428	downstream_gene_variant	4,284040756
X2L_6299498_SNP	5,20E-05	17	47	18	57	0,20098342	2L:6299498	Ddr	intron_variant	4,283692673	Ddr
X2R_14535206_SNP	5,21E-05	40	25	41	35	0,20098342	2R:18647701	SP2637	intron_variant	4,283420346	SP2637
X2L_19593575_DEL	5,25E-05	39	19	48	21	0,201859468	2L:19593575	Lar	intron_variant	4,279545559	Lar
X2L_20260743_SNP	5,27E-05	46	18	52	22	0,201859468	2L:20260743	CG17570	downstream_gene_variant	4,278561125
X2L_20260743_SNP	5,27E-05	46	18	52	22	0,201859468	2L:20260743	CG17571	upstream_gene_variant	4,278561125
X2R_16049685_SNP	5,27E-05	3	64	6	73	0,201859468	2R:20162180	-	intergenic_variant	4,277998074
X3L_11399592_SNP	5,28E-05	4	63	5	74	0,201859468	3L:11406492	CR44363	downstream_gene_variant	4,277459362
X2R_10578309_SNP	5,29E-05	3	63	6	74	0,201859468	2R:14690804	mspo	intron_variant	4,276859532	mspo
X2L_9263647_SNP	5,29E-05	2	64	7	73	0,201859468	2L:9263647	CR45262	upstream_gene_variant	4,276191699
X2L_9263647_SNP	5,29E-05	2	64	7	73	0,201859468	2L:9263647	Ggamma30A	intron_variant	4,276191699	Ggamma30A
X2L_9253367_SNP	5,33E-05	62	64	9	NA	0,20230569	2L:9253367	aust	upstream_gene_variant	4,273274095
X2L_9253367_SNP	5,33E-05	62	64	9	NA	0,20230569	2L:9253367	borr	upstream_gene_variant	4,273274095
X2L_9253367_SNP	5,33E-05	62	64	9	NA	0,20230569	2L:9253367	CR43734	upstream_gene_variant	4,273274095
X2L_9253367_SNP	5,33E-05	62	64	9	NA	0,20230569	2L:9253367	Ggamma30A	upstream_gene_variant	4,273274095
X2L_9253367_SNP	5,33E-05	62	64	9	NA	0,20230569	2L:9253367	lectin-30A	downstream_gene_variant	4,273274095
X2L_9253367_SNP	5,33E-05	62	64	9	NA	0,20230569	2L:9253367	tai	downstream_gene_variant	4,273274095
X2R_12267801_SNP	5,33E-05	59	6	66	9	0,20230569	2R:16380296	CG43187	upstream_gene_variant	4,273231238
X2R_12267801_SNP	5,33E-05	59	6	66	9	0,20230569	2R:16380296	CR45316	downstream_gene_variant	4,273231238
X2R_12267801_SNP	5,33E-05	59	6	66	9	0,20230569	2R:16380296	CR45317	upstream_gene_variant	4,273231238
X_8730678_SNP	5,35E-05	41	23	52	25	0,20230569	X:8836645	CG12075	upstream_gene_variant	4,271879663
X_8730678_SNP	5,35E-05	41	23	52	25	0,20230569	X:8836645	CR45537	non_coding_transcript_exon_variant	4,271879663	CR45537
X3R_26764118_SNP	5,35E-05	52	8	63	17	0,20230569	3R:30938396	CG15549	upstream_gene_variant	4,271578116
X3R_26764118_SNP	5,35E-05	52	8	63	17	0,20230569	3R:30938396	CG15550	upstream_gene_variant	4,271578116
X2L_5709835_SNP	5,37E-05	64	1	70	8	0,20230569	2L:5709835	CG7236	intron_variant	4,270219289	CG7236
X2L_5709835_SNP	5,37E-05	64	1	70	8	0,20230569	2L:5709835	CG7236	upstream_gene_variant	4,270219289
X3L_9801356_SNP	5,38E-05	44	22	47	27	0,20230569	3L:9808256	CG32052	3_prime_UTR_variant	4,269063488	CG32052
X3L_9801356_SNP	5,38E-05	44	22	47	27	0,20230569	3L:9808256	Ilp4	upstream_gene_variant	4,269063488
X2L_19913004_SNP	5,38E-05	13	53	13	64	0,20230569	2L:19913004	CR43097	upstream_gene_variant	4,268887205
X2L_19913004_SNP	5,38E-05	13	53	13	64	0,20230569	2L:19913004	sick	intron_variant	4,268887205	sick
X2L_19913004_SNP	5,38E-05	13	53	13	64	0,20230569	2L:19913004	TotF	upstream_gene_variant	4,268887205
X2L_19913004_SNP	5,38E-05	13	53	13	64	0,20230569	2L:19913004	Victoria	3_prime_UTR_variant	4,268887205	Victoria
X3R_21378597_SNP	5,40E-05	61	4	66	11	0,20230569	3R:25552875	CR46100	downstream_gene_variant	4,267878564
X3R_21378597_SNP	5,40E-05	61	4	66	11	0,20230569	3R:25552875	msi	intron_variant	4,267878564	msi
X2L_12049583_SNP	5,40E-05	54	8	60	15	0,20230569	2L:12049583	CG14945	5_prime_UTR_variant	4,267344214	CG14945
X2L_12049583_SNP	5,40E-05	54	8	60	15	0,20230569	2L:12049583	CG14945	upstream_gene_variant	4,267344214
X2L_12049583_SNP	5,40E-05	54	8	60	15	0,20230569	2L:12049583	CG6770	upstream_gene_variant	4,267344214
X2L_12049583_SNP	5,40E-05	54	8	60	15	0,20230569	2L:12049583	CG6785	upstream_gene_variant	4,267344214
X2L_12049583_SNP	5,40E-05	54	8	60	15	0,20230569	2L:12049583	CR44589	downstream_gene_variant	4,267344214
X2L_12049583_SNP	5,40E-05	54	8	60	15	0,20230569	2L:12049583	JhI-21	downstream_gene_variant	4,267344214
X2L_12049583_SNP	5,40E-05	54	8	60	15	0,20230569	2L:12049583	Plzf	upstream_gene_variant	4,267344214
X2R_10344105_SNP	5,42E-05	59	6	77	1	0,202409247	2R:14456600	Oaz	intron_variant	4,265808128	Oaz
X2R_10344105_SNP	5,42E-05	59	6	77	1	0,202409247	2R:14456600	Oaz	upstream_gene_variant	4,265808128
X3L_8244832_SNP	5,43E-05	33	32	45	31	0,202409247	3L:8251732	Dscam4	intron_variant	4,265247601	Dscam4
X2R_14515312_SNP	5,44E-05	29	38	28	48	0,202409247	2R:18627807	Atg7	upstream_gene_variant	4,264523982
X2R_14515312_SNP	5,44E-05	29	38	28	48	0,202409247	2R:18627807	CG30122	downstream_gene_variant	4,264523982
X2R_14515312_SNP	5,44E-05	29	38	28	48	0,202409247	2R:18627807	CG5335	downstream_gene_variant	4,264523982
X2R_14515312_SNP	5,44E-05	29	38	28	48	0,202409247	2R:18627807	CG5482	downstream_gene_variant	4,264523982
X2R_14515312_SNP	5,44E-05	29	38	28	48	0,202409247	2R:18627807	Eip55E	upstream_gene_variant	4,264523982
X2R_14515312_SNP	5,44E-05	29	38	28	48	0,202409247	2R:18627807	Sec6	downstream_gene_variant	4,264523982
X2R_14359929_SNP	5,45E-05	8	58	12	68	0,202479299	2R:18472424	CG30116	intron_variant	4,26351115	CG30116
X2L_5681456_SNP	5,48E-05	55	7	68	10	0,203300905	2L:5681456	CG12511	downstream_gene_variant	4,260891625
X2R_6756164_SNP	5,51E-05	37	26	41	33	0,203582841	2R:10868659	CG30015	intron_variant	4,259091075	CG30015
X2L_12163199_SNP	5,52E-05	23	36	27	43	0,203582841	2L:12163199	CG31760	intron_variant	4,257937339	CG31760
X2L_12163199_SNP	5,52E-05	23	36	27	43	0,203582841	2L:12163199	CG31861	downstream_gene_variant	4,257937339
X2L_12163199_SNP	5,52E-05	23	36	27	43	0,203582841	2L:12163199	ZnT33D	upstream_gene_variant	4,257937339
X2L_4375135_SNP	5,53E-05	22	40	31	44	0,203582841	2L:4375135	Traf4	intron_variant	4,25748547	Traf4
X2L_13962064_SNP	5,56E-05	58	6	71	6	0,203582841	2L:13962064	NimA	intron_variant	4,254968249	NimA
X2L_13962064_SNP	5,56E-05	58	6	71	6	0,203582841	2L:13962064	NimB1	upstream_gene_variant	4,254968249
X2L_13962064_SNP	5,56E-05	58	6	71	6	0,203582841	2L:13962064	NimB2	downstream_gene_variant	4,254968249
X3L_2813433_SNP	5,56E-05	62	5	75	5	0,203582841	3L:2813433	Tet	intron_variant	4,254926849	Tet
X2R_10371682_SNP	5,57E-05	13	50	21	55	0,203582841	2R:14484177	L	intron_variant	4,253775071	L
X2L_5116507_SNP	5,58E-05	23	37	21	53	0,203582841	2L:5116507	Msp300	intron_variant	4,253739159	Msp300
X3L_13982824_INS	5,59E-05	57	9	61	12	0,203582841	3L:13989724	26-29-p	upstream_gene_variant	4,252955439
X3L_13982824_INS	5,59E-05	57	9	61	12	0,203582841	3L:13989724	CG17362	downstream_gene_variant	4,252955439
X3L_13982824_INS	5,59E-05	57	9	61	12	0,203582841	3L:13989724	CG17364	intron_variant	4,252955439	CG17364
X3L_13982824_INS	5,59E-05	57	9	61	12	0,203582841	3L:13989724	CG9040	downstream_gene_variant	4,252955439
X_21218035_SNP	5,59E-05	8	58	8	72	0,203582841	X:21347008	pen	synonymous_variant	4,252618027	pen
X_21218035_SNP	5,59E-05	8	58	8	72	0,203582841	X:21347008	dod	downstream_gene_variant	4,252618027
X_21218035_SNP	5,59E-05	8	58	8	72	0,203582841	X:21347008	fliI	downstream_gene_variant	4,252618027
X_21218035_SNP	5,59E-05	8	58	8	72	0,203582841	X:21347008	sol	upstream_gene_variant	4,252618027
X3R_17326155_SNP	5,61E-05	9	55	8	69	0,203903211	3R:21500433	C15	splice_region_variant,intron_variant	4,251091022	C15
X3R_17326155_SNP	5,61E-05	9	55	8	69	0,203903211	3R:21500433	CR44032	upstream_gene_variant	4,251091022
X2L_8390166_SNP	5,63E-05	43	20	56	23	0,20438034	2L:8390166	CG42820	synonymous_variant	4,249233496	CG42820
X2L_8390166_SNP	5,63E-05	43	20	56	23	0,20438034	2L:8390166	Acp29AB	downstream_gene_variant	4,249233496
X2L_8390166_SNP	5,63E-05	43	20	56	23	0,20438034	2L:8390166	CG13384	downstream_gene_variant	4,249233496
X2L_8390166_SNP	5,63E-05	43	20	56	23	0,20438034	2L:8390166	CG42819	upstream_gene_variant	4,249233496
X2L_8390166_SNP	5,63E-05	43	20	56	23	0,20438034	2L:8390166	CR45343	upstream_gene_variant	4,249233496
X2L_8390166_SNP	5,63E-05	43	20	56	23	0,20438034	2L:8390166	lectin-29Ca	downstream_gene_variant	4,249233496
X2L_8390166_SNP	5,63E-05	43	20	56	23	0,20438034	2L:8390166	Peritrophin-15b	downstream_gene_variant	4,249233496
X2L_8390166_SNP	5,63E-05	43	20	56	23	0,20438034	2L:8390166	snRNA:U6atac:29B	downstream_gene_variant	4,249233496
X2L_11038224_SNP	5,67E-05	51	10	64	11	0,205291596	2L:11038224	CG18666	downstream_gene_variant	4,246460603
X2L_11038224_SNP	5,67E-05	51	10	64	11	0,205291596	2L:11038224	Samuel	intron_variant	4,246460603	Samuel
X2R_12066234_SNP	5,69E-05	1	66	9	69	0,205508907	2R:16178729	Lis-1	upstream_gene_variant	4,245161907
X2R_12066234_SNP	5,69E-05	1	66	9	69	0,205508907	2R:16178729	Ptp52F	upstream_gene_variant	4,245161907
X2L_9096056_SNP	5,72E-05	5	61	8	71	0,205820454	2L:9096056	CG31609	upstream_gene_variant	4,242894028
X2L_9096056_SNP	5,72E-05	5	61	8	71	0,205820454	2L:9096056	CR44482	upstream_gene_variant	4,242894028
X3L_12176593_SNP	5,72E-05	6	61	16	62	0,205820454	3L:12183493	CAH2	downstream_gene_variant	4,24283044
X3L_12176593_SNP	5,72E-05	6	61	16	62	0,205820454	3L:12183493	CG6910	upstream_gene_variant	4,24283044
X2L_10643693_SNP	5,74E-05	29	30	32	37	0,206181224	2L:10643693	CG17097	upstream_gene_variant	4,241205549
X2L_10643693_SNP	5,74E-05	29	30	32	37	0,206181224	2L:10643693	CG18284	upstream_gene_variant	4,241205549
X2L_10643693_SNP	5,74E-05	29	30	32	37	0,206181224	2L:10643693	CG31872	downstream_gene_variant	4,241205549
X2L_10643693_SNP	5,74E-05	29	30	32	37	0,206181224	2L:10643693	CR45351	downstream_gene_variant	4,241205549
X2R_15159096_SNP	5,75E-05	10	56	14	64	0,206181224	2R:19271591	rib	intron_variant	4,240191844	rib
X2R_15159096_SNP	5,75E-05	10	56	14	64	0,206181224	2R:19271591	rib	upstream_gene_variant	4,240191844
X2R_8638091_SNP	5,79E-05	63	4	70	10	0,206181224	2R:12750586	CG42663	synonymous_variant	4,237029155	CG42663
X2R_8638091_SNP	5,79E-05	63	4	70	10	0,206181224	2R:12750586	mos	downstream_gene_variant	4,237029155
X2R_8638091_SNP	5,79E-05	63	4	70	10	0,206181224	2R:12750586	Taz	downstream_gene_variant	4,237029155
X2R_10714656_SNP	5,80E-05	21	37	22	45	0,206181224	2R:14827151	CR45329	upstream_gene_variant	4,236453939
X2L_9440069_SNP	5,82E-05	10	52	14	57	0,206181224	2L:9440069	CG33723	missense_variant	4,235022545	CG33723
X2L_9440069_SNP	5,82E-05	10	52	14	57	0,206181224	2L:9440069	CG3769	downstream_gene_variant	4,235022545
X2L_9440069_SNP	5,82E-05	10	52	14	57	0,206181224	2L:9440069	numb	intron_variant	4,235022545	numb
X2L_9440069_SNP	5,82E-05	10	52	14	57	0,206181224	2L:9440069	RpS28-like	downstream_gene_variant	4,235022545
X2L_9440069_SNP	5,82E-05	10	52	14	57	0,206181224	2L:9440069	scat	downstream_gene_variant	4,235022545
X2R_9768777_SNP	5,82E-05	60	4	68	11	0,206181224	2R:13881272	shot	synonymous_variant	4,234912283	shot
X2R_10735784_SNP	5,82E-05	64	3	69	7	0,206181224	2R:14848279	CG10209	5_prime_UTR_variant	4,234786165	CG10209
X2R_10735784_SNP	5,82E-05	64	3	69	7	0,206181224	2R:14848279	Ercc1	upstream_gene_variant	4,234786165
X2R_10735784_SNP	5,82E-05	64	3	69	7	0,206181224	2R:14848279	NaPi-T	upstream_gene_variant	4,234786165
X2R_10735784_SNP	5,82E-05	64	3	69	7	0,206181224	2R:14848279	SMC2	downstream_gene_variant	4,234786165
X3R_15220742_SNP	5,83E-05	59	5	68	9	0,206181224	3R:19395020	CG3739	synonymous_variant	4,234332041	CG3739
X3R_15220742_SNP	5,83E-05	59	5	68	9	0,206181224	3R:19395020	CG18493	downstream_gene_variant	4,234332041
X3R_15220742_SNP	5,83E-05	59	5	68	9	0,206181224	3R:19395020	CG31244	downstream_gene_variant	4,234332041
X3R_15220742_SNP	5,83E-05	59	5	68	9	0,206181224	3R:19395020	Ino80	intron_variant	4,234332041	Ino80
X3R_26463784_INS	5,85E-05	39	19	51	23	0,206181224	3R:30638062	-	intergenic_variant	4,23299219
X3L_11172414_SNP	5,86E-05	65	2	75	5	0,206181224	3L:11179314	GlcAT-P	synonymous_variant	4,232177317	GlcAT-P
X3L_11172414_SNP	5,86E-05	65	2	75	5	0,206181224	3L:11179314	CG14142	downstream_gene_variant	4,232177317
X2L_9253255_SNP	5,86E-05	65	70	7	NA	0,206181224	2L:9253255	aust	upstream_gene_variant	4,232032206
X2L_9253255_SNP	5,86E-05	65	70	7	NA	0,206181224	2L:9253255	borr	upstream_gene_variant	4,232032206
X2L_9253255_SNP	5,86E-05	65	70	7	NA	0,206181224	2L:9253255	CR43734	upstream_gene_variant	4,232032206
X2L_9253255_SNP	5,86E-05	65	70	7	NA	0,206181224	2L:9253255	Ggamma30A	upstream_gene_variant	4,232032206
X2L_9253255_SNP	5,86E-05	65	70	7	NA	0,206181224	2L:9253255	lectin-30A	downstream_gene_variant	4,232032206
X2L_9253255_SNP	5,86E-05	65	70	7	NA	0,206181224	2L:9253255	tai	downstream_gene_variant	4,232032206
X_11840457_SNP	5,87E-05	19	45	36	40	0,206181224	X:11946424	cac	intron_variant	4,231683855	cac
X2L_16915642_SNP	5,87E-05	44	20	62	12	0,206181224	2L:16915642	tweek	intron_variant	4,231345992	tweek
X2L_9096347_SNP	5,92E-05	60	5	71	8	0,207469172	2L:9096347	CG31609	upstream_gene_variant	4,227331656
X2L_9096347_SNP	5,92E-05	60	5	71	8	0,207469172	2L:9096347	CR44482	upstream_gene_variant	4,227331656
X2L_19849334_SNP	5,97E-05	7	58	9	69	0,207469172	2L:19849334	sick	intron_variant	4,223809012	sick
X2L_19849334_SNP	5,97E-05	7	58	9	69	0,207469172	2L:19849334	sick	upstream_gene_variant	4,223809012
X2L_5737594_SNP	5,98E-05	60	6	69	9	0,207469172	2L:5737594	CG11030	intron_variant	4,223288867	CG11030
X2L_5737594_SNP	5,98E-05	60	6	69	9	0,207469172	2L:5737594	CG11147	intron_variant	4,223288867	CG11147
X2R_10572661_SNP	5,99E-05	56	9	62	11	0,207469172	2R:14685156	mspo	intron_variant	4,222443706	mspo
X3L_11173248_SNP	5,99E-05	2	64	5	75	0,207469172	3L:11180148	CG14142	downstream_gene_variant	4,222417179
X3L_11173248_SNP	5,99E-05	2	64	5	75	0,207469172	3L:11180148	GlcAT-P	intron_variant	4,222417179	GlcAT-P
X_9299178_DEL	5,99E-05	62	4	69	8	0,207469172	X:9405145	mgl	intron_variant	4,222219071	mgl
X2L_3398715_SNP	6,00E-05	58	7	69	8	0,207469172	2L:3398715	CG34175	downstream_gene_variant	4,222205162
X2L_3398715_SNP	6,00E-05	58	7	69	8	0,207469172	2L:3398715	CR44792	upstream_gene_variant	4,222205162
X2L_13870091_SNP	6,00E-05	64	1	70	5	0,207469172	2L:13870091	CenG1A	intron_variant	4,222171478	CenG1A
X2L_13870091_SNP	6,00E-05	64	1	70	5	0,207469172	2L:13870091	CR44848	upstream_gene_variant	4,222171478
X_20918471_SNP	6,04E-05	46	21	53	27	0,208523668	X:21047444	Cbs	intron_variant	4,219167674	Cbs
X_20918471_SNP	6,04E-05	46	21	53	27	0,208523668	X:21047444	CG1518	downstream_gene_variant	4,219167674
X_20918471_SNP	6,04E-05	46	21	53	27	0,208523668	X:21047444	CR44431	upstream_gene_variant	4,219167674
X_20918471_SNP	6,04E-05	46	21	53	27	0,208523668	X:21047444	Mgstl	downstream_gene_variant	4,219167674
X_20918471_SNP	6,04E-05	46	21	53	27	0,208523668	X:21047444	scaRNA:MeU2-C28	downstream_gene_variant	4,219167674
X_20918471_SNP	6,04E-05	46	21	53	27	0,208523668	X:21047444	snoRNA:Me28S-U3344a	downstream_gene_variant	4,219167674
X_20918471_SNP	6,04E-05	46	21	53	27	0,208523668	X:21047444	snoRNA:Me28S-U3344b	downstream_gene_variant	4,219167674
X2R_10716233_SNP	6,06E-05	7	59	11	66	0,208670222	2R:14828728	CG10205	upstream_gene_variant	4,2174229
X2R_10716233_SNP	6,06E-05	7	59	11	66	0,208670222	2R:14828728	CR45329	upstream_gene_variant	4,2174229
X_21057647_SNP	6,06E-05	17	47	20	58	0,208670222	X:21186620	CR45506	upstream_gene_variant	4,217262938
X2R_14266079_SNP	6,10E-05	63	3	71	6	0,208927125	2R:18378574	CG43202	downstream_gene_variant	4,214632219
X2R_14266079_SNP	6,10E-05	63	3	71	6	0,208927125	2R:18378574	CR42736	downstream_gene_variant	4,214632219
X2R_14266079_SNP	6,10E-05	63	3	71	6	0,208927125	2R:18378574	IM23	downstream_gene_variant	4,214632219
X2R_10353428_INS	6,11E-05	12	48	11	62	0,208927125	2R:14465923	Oaz	downstream_gene_variant	4,213911169
X3R_7748810_SNP	6,11E-05	49	11	58	17	0,208927125	3R:11923088	Cad87A	intron_variant	4,213753703	Cad87A
X2L_9300100_SNP	6,14E-05	65	1	66	12	0,208927125	2L:9300100	CR42844	downstream_gene_variant	4,21202385
X2L_9300100_SNP	6,14E-05	65	1	66	12	0,208927125	2L:9300100	Ggamma30A	3_prime_UTR_variant	4,21202385	Ggamma30A
X2L_9300100_SNP	6,14E-05	65	1	66	12	0,208927125	2L:9300100	Ggamma30A	downstream_gene_variant	4,21202385
X2R_10951812_SNP	6,14E-05	13	54	12	67	0,208927125	2R:15064307	-	intergenic_variant	4,211777947
X2L_6294405_SNP	6,15E-05	1	63	6	74	0,208927125	2L:6294405	Ddr	downstream_gene_variant	4,211341733
X2L_6294405_SNP	6,15E-05	1	63	6	74	0,208927125	2L:6294405	Ddr	intron_variant	4,211341733	Ddr
X2R_10416652_SNP	6,16E-05	66	1	73	7	0,208927125	2R:14529147	ttv	intron_variant	4,210461168	ttv
X2L_1218626_SNP	6,16E-05	43	21	38	32	0,208927125	2L:1218626	CG42329	upstream_gene_variant	4,210388409
X2L_1218626_SNP	6,16E-05	43	21	38	32	0,208927125	2L:1218626	CR43263	upstream_gene_variant	4,210388409
X2L_1218626_SNP	6,16E-05	43	21	38	32	0,208927125	2L:1218626	CR45346	upstream_gene_variant	4,210388409
X3L_10793135_SNP	6,19E-05	13	40	13	51	0,209084729	3L:10800035	CG12523	upstream_gene_variant	4,208279393
X3L_10793135_SNP	6,19E-05	13	40	13	51	0,209084729	3L:10800035	CR44347	downstream_gene_variant	4,208279393
X3L_10793135_SNP	6,19E-05	13	40	13	51	0,209084729	3L:10800035	CR44546	downstream_gene_variant	4,208279393
X2R_10951809_SNP	6,20E-05	54	13	67	12	0,209084729	2R:15064304	-	intergenic_variant	4,207866582
X3R_26774663_SNP	6,20E-05	16	45	21	55	0,209084729	3R:30948941	-	intergenic_variant	4,207707019
X2R_9631995_DEL	6,23E-05	49	18	44	30	0,209156193	2R:13744490	fas	intron_variant	4,205778746	fas
X2L_4376295_SNP	6,23E-05	22	39	34	43	0,209156193	2L:4376295	CG17612	downstream_gene_variant	4,20529486
X2L_4376295_SNP	6,23E-05	22	39	34	43	0,209156193	2L:4376295	Traf4	intron_variant	4,20529486	Traf4
X2R_13480962_SNP	6,23E-05	25	41	31	47	0,209156193	2R:17593457	CG11423	upstream_gene_variant	4,205217388
X2R_13480962_SNP	6,23E-05	25	41	31	47	0,209156193	2R:17593457	CG30105	upstream_gene_variant	4,205217388
X2R_13480962_SNP	6,23E-05	25	41	31	47	0,209156193	2R:17593457	icln	downstream_gene_variant	4,205217388
X2R_13480962_SNP	6,23E-05	25	41	31	47	0,209156193	2R:17593457	RhoGAP54D	upstream_gene_variant	4,205217388
X2R_13480962_SNP	6,23E-05	25	41	31	47	0,209156193	2R:17593457	Smurf	intron_variant	4,205217388	Smurf
X2R_10520804_SNP	6,26E-05	64	3	72	8	0,209264427	2R:14633299	CG10131	downstream_gene_variant	4,203089046
X2R_10735174_SNP	6,28E-05	6	61	13	65	0,209264427	2R:14847669	CG10209	synonymous_variant	4,201973212	CG10209
X2R_10735174_SNP	6,28E-05	6	61	13	65	0,209264427	2R:14847669	NaPi-T	upstream_gene_variant	4,201973212
X2R_10735174_SNP	6,28E-05	6	61	13	65	0,209264427	2R:14847669	SMC2	downstream_gene_variant	4,201973212
X_12722306_SNP	6,28E-05	26	37	21	53	0,209264427	X:12828273	Pde9	intron_variant	4,20192585	Pde9
X2L_20125315_SNP	6,28E-05	50	16	64	10	0,209264427	2L:20125315	-	intergenic_variant	4,201890592
X2R_6950491_SNP	6,32E-05	67	73	5	NA	0,209527512	2R:11062986	luna	intron_variant	4,199244579	lu
X2R_13191083_SNP	6,32E-05	38	27	55	23	0,209527512	2R:17303578	CR43661	downstream_gene_variant	4,199196003
X2R_13191083_SNP	6,32E-05	38	27	55	23	0,209527512	2R:17303578	mbl	intron_variant	4,199196003	mbl
X2L_5708238_SNP	6,35E-05	5	61	8	65	0,209527512	2L:5708238	CG7236	intron_variant	4,197447377	CG7236
X2L_5708238_SNP	6,35E-05	5	61	8	65	0,209527512	2L:5708238	CG7236	upstream_gene_variant	4,197447377
X2L_2557480_SNP	6,35E-05	51	11	68	7	0,209527512	2L:2557480	CG3515	upstream_gene_variant	4,197419733
X2L_2557480_SNP	6,35E-05	51	11	68	7	0,209527512	2L:2557480	CR44113	downstream_gene_variant	4,197419733
X_17250787_SNP	6,36E-05	50	15	65	13	0,209527512	X:17356754	-	intergenic_variant	4,196657141
X2L_3272955_SNP	6,36E-05	1	65	5	75	0,209527512	2L:3272955	CG3332	downstream_gene_variant	4,196466958
X2L_3272955_SNP	6,36E-05	1	65	5	75	0,209527512	2L:3272955	CG3347	downstream_gene_variant	4,196466958
X2L_3272955_SNP	6,36E-05	1	65	5	75	0,209527512	2L:3272955	CR44484	downstream_gene_variant	4,196466958
X2L_9089863_SNP	6,39E-05	59	1	66	8	0,209527512	2L:9089863	Toll-4	downstream_gene_variant	4,194821278
X2R_8626064_SNP	6,39E-05	46	19	53	24	0,209527512	2R:12738559	CG42663	intron_variant	4,194263368	CG42663
X2R_14702852_SNP	6,40E-05	1	65	5	69	0,209527512	2R:18815347	CG15096	5_prime_UTR_variant	4,193625248	CG15096
X2R_14702852_SNP	6,40E-05	1	65	5	69	0,209527512	2R:18815347	CG15096	upstream_gene_variant	4,193625248
X2R_14702852_SNP	6,40E-05	1	65	5	69	0,209527512	2R:18815347	CR43418	non_coding_transcript_exon_variant	4,193625248	CR43418
X2R_14702852_SNP	6,40E-05	1	65	5	69	0,209527512	2R:18815347	Phb2	upstream_gene_variant	4,193625248
X2R_10151161_SNP	6,41E-05	29	35	43	34	0,209527512	2R:14263656	CG8547	missense_variant	4,193479781	CG8547
X2R_10151161_SNP	6,41E-05	29	35	43	34	0,209527512	2R:14263656	beta4GalNAcTA	downstream_gene_variant	4,193479781
X2R_10151161_SNP	6,41E-05	29	35	43	34	0,209527512	2R:14263656	CG8531	downstream_gene_variant	4,193479781
X2R_7476365_SNP	6,41E-05	40	22	44	32	0,209527512	2R:11588860	tou	synonymous_variant	4,192926638	tou
X2R_7476365_SNP	6,41E-05	40	22	44	32	0,209527512	2R:11588860	snoRNA:Psi28S-1180	downstream_gene_variant	4,192926638
X2R_7476365_SNP	6,41E-05	40	22	44	32	0,209527512	2R:11588860	snoRNA:Psi28S-1936	upstream_gene_variant	4,192926638
X2R_10935521_DEL	6,45E-05	32	18	36	30	0,210254838	2R:15048016	CR43622	downstream_gene_variant	4,190664426
X2L_993253_SNP	6,53E-05	59	7	73	4	0,212601369	2L:993253	CR44801	upstream_gene_variant	4,185088415
X2R_15595812_SNP	6,60E-05	1	65	6	73	0,21437618	2R:19708307	CR44509	downstream_gene_variant	4,180723304
X2R_15595812_SNP	6,60E-05	1	65	6	73	0,21437618	2R:19708307	Obp56d	upstream_gene_variant	4,180723304
X2R_15595812_SNP	6,60E-05	1	65	6	73	0,21437618	2R:19708307	Obp56e	upstream_gene_variant	4,180723304
X_2144036_INS	6,61E-05	60	5	80	NA	0,214525126	X:2250003	CG3078	downstream_gene_variant	4,179668337
X_2144036_INS	6,61E-05	60	5	80	NA	0,214525126	X:2250003	CG3091	downstream_gene_variant	4,179668337
X_2144036_INS	6,61E-05	60	5	80	NA	0,214525126	X:2250003	CG3191	downstream_gene_variant	4,179668337
X_2144036_INS	6,61E-05	60	5	80	NA	0,214525126	X:2250003	crn	upstream_gene_variant	4,179668337
X_2144036_INS	6,61E-05	60	5	80	NA	0,214525126	X:2250003	fs(1)K10	downstream_gene_variant	4,179668337
X_2144036_INS	6,61E-05	60	5	80	NA	0,214525126	X:2250003	Or2a	downstream_gene_variant	4,179668337
X2R_14706692_SNP	6,63E-05	43	20	49	23	0,214636373	2R:18819187	CG15096	upstream_gene_variant	4,178691156
X2R_14706692_SNP	6,63E-05	43	20	49	23	0,214636373	2R:18819187	CG15097	downstream_gene_variant	4,178691156
X2R_14706692_SNP	6,63E-05	43	20	49	23	0,214636373	2R:18819187	CR43418	downstream_gene_variant	4,178691156
X2R_14706692_SNP	6,63E-05	43	20	49	23	0,214636373	2R:18819187	Phb2	upstream_gene_variant	4,178691156
X2R_10535797_SNP	6,64E-05	6	59	3	76	0,214719689	2R:14648292	CG10139	downstream_gene_variant	4,177771882
X4_932850_DEL	6,66E-05	11	5	15	3	0,21481834	4:912224	CR43361	downstream_gene_variant	4,176822966
X4_932850_DEL	6,66E-05	11	5	15	3	0,21481834	4:912224	eIF4G	downstream_gene_variant	4,176822966
X4_932850_DEL	6,66E-05	11	5	15	3	0,21481834	4:912224	unc-13	5_prime_UTR_variant	4,176822966	unc-13
X2R_18315191_DEL	6,67E-05	3	59	10	63	0,214935275	2R:22427686	ppk12	splice_region_variant,intron_variant	4,175838486	ppk12
X2R_18315191_DEL	6,67E-05	3	59	10	63	0,214935275	2R:22427686	CG10344	upstream_gene_variant	4,175838486
X2R_18315191_DEL	6,67E-05	3	59	10	63	0,214935275	2R:22427686	rad50	downstream_gene_variant	4,175838486
X2R_10110866_SNP	6,69E-05	37	28	45	33	0,21498918	2R:14223361	CG8468	intron_variant	4,1743819	CG8468
X2L_8795735_DEL	6,70E-05	7	55	3	74	0,21498918	2L:8795735	-	intergenic_variant	4,174237159
X2L_16967588_SNP	6,71E-05	66	1	75	5	0,215167859	2L:16967588	CR45285	downstream_gene_variant	4,173132071
X2L_7975252_SNP	6,74E-05	61	5	77	3	0,215553679	2L:7975252	Snoo	synonymous_variant	4,17161101	Snoo
X_10849625_SNP	6,75E-05	52	13	67	10	0,215662931	X:10955592	Myo10A	synonymous_variant	4,170649197	Myo10A
X_10849625_SNP	6,75E-05	52	13	67	10	0,215662931	X:10955592	Myo10A	intron_variant	4,170649197	Myo10A
X_10849625_SNP	6,75E-05	52	13	67	10	0,215662931	X:10955592	Rab9Fa	upstream_gene_variant	4,170649197
X_10849625_SNP	6,75E-05	52	13	67	10	0,215662931	X:10955592	Rab9Fb	upstream_gene_variant	4,170649197
X2R_10104321_DEL	6,77E-05	8	56	19	58	0,215771874	2R:14216816	CG8468	upstream_gene_variant	4,169689382
X2R_10104321_DEL	6,77E-05	8	56	19	58	0,215771874	2R:14216816	mir-308	upstream_gene_variant	4,169689382
X2R_10104321_DEL	6,77E-05	8	56	19	58	0,215771874	2R:14216816	RpS23	upstream_gene_variant	4,169689382
X2R_10104321_DEL	6,77E-05	8	56	19	58	0,215771874	2R:14216816	Sox15	upstream_gene_variant	4,169689382
X2L_9262563_SNP	6,81E-05	65	2	73	6	0,216943197	2L:9262563	CR45262	non_coding_transcript_exon_variant	4,166598954	CR45262
X2L_9262563_SNP	6,81E-05	65	2	73	6	0,216943197	2L:9262563	Ggamma30A	intron_variant	4,166598954	Ggamma30A
X2R_3820649_SNP	6,83E-05	21	41	29	49	0,21702808	2R:7933144	drosha	missense_variant	4,165663874	drosha
X2R_3820649_SNP	6,83E-05	21	41	29	49	0,21702808	2R:7933144	CG30381	upstream_gene_variant	4,165663874
X2R_3820649_SNP	6,83E-05	21	41	29	49	0,21702808	2R:7933144	CG8728	downstream_gene_variant	4,165663874
X2R_3820649_SNP	6,83E-05	21	41	29	49	0,21702808	2R:7933144	CG8791	downstream_gene_variant	4,165663874
X2R_3820649_SNP	6,83E-05	21	41	29	49	0,21702808	2R:7933144	rnh1	upstream_gene_variant	4,165663874
X2L_14403491_SNP	6,84E-05	4	61	9	67	0,21702808	2L:14403491	elB	intron_variant	4,164954375	elB
X3L_16546720_SNP	6,87E-05	26	34	43	28	0,217543298	3L:16553620	CG4229	upstream_gene_variant	4,163189127
X2L_15382325_SNP	6,90E-05	43	15	55	17	0,218194998	2L:15382325	-	intergenic_variant	4,161155819
X2R_10171524_DEL	6,94E-05	1	66	5	75	0,219020311	2R:14284019	Ih	intron_variant	4,158783232	Ih
X2R_10171524_DEL	6,94E-05	1	66	5	75	0,219020311	2R:14284019	Ih	upstream_gene_variant	4,158783232
X2L_9253293_SNP	6,95E-05	67	69	9	NA	0,21905295	2L:9253293	aust	upstream_gene_variant	4,157986764
X2L_9253293_SNP	6,95E-05	67	69	9	NA	0,21905295	2L:9253293	borr	upstream_gene_variant	4,157986764
X2L_9253293_SNP	6,95E-05	67	69	9	NA	0,21905295	2L:9253293	CR43734	upstream_gene_variant	4,157986764
X2L_9253293_SNP	6,95E-05	67	69	9	NA	0,21905295	2L:9253293	Ggamma30A	upstream_gene_variant	4,157986764
X2L_9253293_SNP	6,95E-05	67	69	9	NA	0,21905295	2L:9253293	lectin-30A	downstream_gene_variant	4,157986764
X2L_9253293_SNP	6,95E-05	67	69	9	NA	0,21905295	2L:9253293	tai	downstream_gene_variant	4,157986764
X2L_14435762_SNP	7,00E-05	5	61	4	75	0,220192613	2L:14435762	CR44732	upstream_gene_variant	4,155002604
X2L_15512158_SNP	7,03E-05	61	2	71	7	0,220220806	2L:15512158	CR44864	downstream_gene_variant	4,153330118
X2R_15595908_SNP	7,03E-05	64	1	73	6	0,220220806	2R:19708403	CR44509	downstream_gene_variant	4,152857036
X2R_15595908_SNP	7,03E-05	64	1	73	6	0,220220806	2R:19708403	Obp56d	upstream_gene_variant	4,152857036
X2R_15595908_SNP	7,03E-05	64	1	73	6	0,220220806	2R:19708403	Obp56e	upstream_gene_variant	4,152857036
X2R_15595908_SNP	7,03E-05	64	1	73	6	0,220220806	2R:19708403	Obp56f	upstream_gene_variant	4,152857036
X3L_7861195_SNP	7,04E-05	10	56	10	69	0,220220806	3L:7868095	CG32365	upstream_gene_variant	4,152177077
X3L_7861195_SNP	7,04E-05	10	56	10	69	0,220220806	3L:7868095	Pdp1	upstream_gene_variant	4,152177077
X2R_10722885_SNP	7,05E-05	51	14	64	11	0,220220806	2R:14835380	CG10205	downstream_gene_variant	4,152037145
X2L_17941517_SNP	7,06E-05	2	61	9	62	0,220391306	2L:17941517	CR44399	upstream_gene_variant	4,150976607
X_6866483_SNP	7,09E-05	1	65	5	74	0,220800153	X:6972450	CG14431	downstream_gene_variant	4,149448475
X_6866483_SNP	7,09E-05	1	65	5	74	0,220800153	X:6972450	CG3040	3_prime_UTR_variant	4,149448475	CG3040
X_6866483_SNP	7,09E-05	1	65	5	74	0,220800153	X:6972450	CG32732	upstream_gene_variant	4,149448475
X_6866483_SNP	7,09E-05	1	65	5	74	0,220800153	X:6972450	CG4586	downstream_gene_variant	4,149448475
X_6866483_SNP	7,09E-05	1	65	5	74	0,220800153	X:6972450	ogre	downstream_gene_variant	4,149448475
X_15970388_SNP	7,11E-05	1	55	6	62	0,220971207	X:16076355	mir-4958	downstream_gene_variant	4,148390137
X_15970388_SNP	7,11E-05	1	55	6	62	0,220971207	X:16076355	Nipsnap	upstream_gene_variant	4,148390137
X_15970388_SNP	7,11E-05	1	55	6	62	0,220971207	X:16076355	Tob	3_prime_UTR_variant	4,148390137	Tob
X_15970388_SNP	7,11E-05	1	55	6	62	0,220971207	X:16076355	Tob	downstream_gene_variant	4,148390137
X3L_6518570_DEL	7,12E-05	30	21	35	29	0,220979913	3L:6525470	sfl	intron_variant	4,147652206	sfl
X2R_19713174_SNP	7,15E-05	9	56	13	66	0,221002746	2R:23825651	CG4763	upstream_gene_variant	4,145751787
X2R_19713174_SNP	7,15E-05	9	56	13	66	0,221002746	2R:23825651	CG5549	intron_variant	4,145751787	CG5549
X3L_1452135_SNP	7,17E-05	6	58	8	69	0,221002746	3L:1452135	Ptp61F	intron_variant	4,14460376	Ptp61F
X3L_14189663_SNP	7,20E-05	4	63	5	74	0,221002746	3L:14196563	nuf	intron_variant	4,142951637	nuf
X2R_10155834_SNP	7,20E-05	36	28	41	36	0,221002746	2R:14268329	CG8547	upstream_gene_variant	4,142857308
X2R_10155834_SNP	7,20E-05	36	28	41	36	0,221002746	2R:14268329	conv	upstream_gene_variant	4,142857308
X2R_10155834_SNP	7,20E-05	36	28	41	36	0,221002746	2R:14268329	SelD	downstream_gene_variant	4,142857308
X2L_8664019_SNP	7,20E-05	2	65	5	74	0,221002746	2L:8664019	Sema-1a	intron_variant	4,142710996	Sema-1a
X2R_15894045_SNP	7,21E-05	18	46	27	51	0,221002746	2R:20006540	CG16898	upstream_gene_variant	4,14190749
X2R_15894045_SNP	7,21E-05	18	46	27	51	0,221002746	2R:20006540	CR44628	upstream_gene_variant	4,14190749
X2R_10679601_SNP	7,22E-05	35	30	40	39	0,221002746	2R:14792096	kn	intron_variant	4,141263085	kn
X2L_6423459_SNP	7,23E-05	62	3	67	12	0,221002746	2L:6423459	CG9527	downstream_gene_variant	4,140710417
X2L_6423459_SNP	7,23E-05	62	3	67	12	0,221002746	2L:6423459	Fic	upstream_gene_variant	4,140710417
X2L_6423459_SNP	7,23E-05	62	3	67	12	0,221002746	2L:6423459	Tig	upstream_gene_variant	4,140710417
X2R_13717995_INS	7,23E-05	57	9	63	10	0,221002746	2R:17830490	grh	intron_variant	4,140685318	grh
X_9471620_SNP	7,24E-05	58	6	74	5	0,221002746	X:9577587	CG32699	intron_variant	4,140464172	CG32699
X_9471620_SNP	7,24E-05	58	6	74	5	0,221002746	X:9577587	CG42395	upstream_gene_variant	4,140464172
X_9471620_SNP	7,24E-05	58	6	74	5	0,221002746	X:9577587	CR45540	downstream_gene_variant	4,140464172
X3L_7861543_SNP	7,25E-05	53	11	65	9	0,22101533	3L:7868443	CG32365	upstream_gene_variant	4,139731546
X3L_7861543_SNP	7,25E-05	53	11	65	9	0,22101533	3L:7868443	Pdp1	upstream_gene_variant	4,139731546
X2L_20561362_SNP	7,26E-05	25	36	29	44	0,221051495	2L:20561362	CR45347	upstream_gene_variant	4,138953743
X2L_20561362_SNP	7,26E-05	25	36	29	44	0,221051495	2L:20561362	mir-4973	upstream_gene_variant	4,138953743
X2L_17045232_SNP	7,32E-05	41	21	43	33	0,221629602	2L:17045232	CG15136	downstream_gene_variant	4,135560951
X2L_17045232_SNP	7,32E-05	41	21	43	33	0,221629602	2L:17045232	CR43802	upstream_gene_variant	4,135560951
X2R_7040184_SNP	7,32E-05	52	12	56	16	0,221629602	2R:11152679	CG12391	upstream_gene_variant	4,135438017
X2R_7040184_SNP	7,32E-05	52	12	56	16	0,221629602	2R:11152679	CG13229	intron_variant	4,135438017	CG13229
X2R_7040184_SNP	7,32E-05	52	12	56	16	0,221629602	2R:11152679	CG13230	upstream_gene_variant	4,135438017
X2L_8390177_SNP	7,34E-05	19	43	23	56	0,221629602	2L:8390177	CG42820	synonymous_variant	4,134218687	CG42820
X2L_8390177_SNP	7,34E-05	19	43	23	56	0,221629602	2L:8390177	Acp29AB	downstream_gene_variant	4,134218687
X2L_8390177_SNP	7,34E-05	19	43	23	56	0,221629602	2L:8390177	CG13384	downstream_gene_variant	4,134218687
X2L_8390177_SNP	7,34E-05	19	43	23	56	0,221629602	2L:8390177	CG42819	upstream_gene_variant	4,134218687
X2L_8390177_SNP	7,34E-05	19	43	23	56	0,221629602	2L:8390177	CR45343	upstream_gene_variant	4,134218687
X2L_8390177_SNP	7,34E-05	19	43	23	56	0,221629602	2L:8390177	lectin-29Ca	downstream_gene_variant	4,134218687
X2L_8390177_SNP	7,34E-05	19	43	23	56	0,221629602	2L:8390177	Peritrophin-15b	downstream_gene_variant	4,134218687
X2L_8390177_SNP	7,34E-05	19	43	23	56	0,221629602	2L:8390177	snRNA:U6atac:29B	downstream_gene_variant	4,134218687
X2R_17304291_SNP	7,35E-05	43	23	62	17	0,221629602	2R:21416786	Sdc	intron_variant	4,133776658	Sdc
X_10719338_SNP	7,35E-05	62	1	74	6	0,221629602	X:10825305	CR45624	downstream_gene_variant	4,133684123
X_10719338_SNP	7,35E-05	62	1	74	6	0,221629602	X:10825305	Imp	upstream_gene_variant	4,133684123
X2R_9485241_SNP	7,35E-05	58	7	69	8	0,221629602	2R:13597736	S-Lap5	synonymous_variant	4,133602949	S-Lap5
X2R_9485241_SNP	7,35E-05	58	7	69	8	0,221629602	2R:13597736	CG43058	downstream_gene_variant	4,133602949
X2R_9485241_SNP	7,35E-05	58	7	69	8	0,221629602	2R:13597736	CG45088	upstream_gene_variant	4,133602949
X2R_9485241_SNP	7,35E-05	58	7	69	8	0,221629602	2R:13597736	CG6191	upstream_gene_variant	4,133602949
X2R_9485241_SNP	7,35E-05	58	7	69	8	0,221629602	2R:13597736	fand	downstream_gene_variant	4,133602949
X2R_13302129_INS	7,39E-05	52	9	62	11	0,221953188	2R:17414624	cnk	inframe_insertion	4,131592872	cnk
X2R_13302129_INS	7,39E-05	52	9	62	11	0,221953188	2R:17414624	CG30101	upstream_gene_variant	4,131592872
X2R_13302129_INS	7,39E-05	52	9	62	11	0,221953188	2R:17414624	Prosalpha5	downstream_gene_variant	4,131592872
X2L_3401507_SNP	7,39E-05	60	5	60	16	0,221953188	2L:3401507	CG34175	downstream_gene_variant	4,131572881
X2L_3401507_SNP	7,39E-05	60	5	60	16	0,221953188	2L:3401507	CR44792	upstream_gene_variant	4,131572881
X2L_3401507_SNP	7,39E-05	60	5	60	16	0,221953188	2L:3401507	pgant2	downstream_gene_variant	4,131572881
X_16978700_SNP	7,42E-05	58	7	68	12	0,222498008	X:17084667	CG4949	downstream_gene_variant	4,129811598
X_16978700_SNP	7,42E-05	58	7	68	12	0,222498008	X:17084667	CG4955	downstream_gene_variant	4,129811598
X_16978700_SNP	7,42E-05	58	7	68	12	0,222498008	X:17084667	CG8945	intron_variant	4,129811598	CG8945
X2L_12163185_INS	7,45E-05	37	23	50	27	0,223075083	2L:12163185	CG31760	intron_variant	4,127839064	CG31760
X2L_12163185_INS	7,45E-05	37	23	50	27	0,223075083	2L:12163185	CG31861	downstream_gene_variant	4,127839064
X2L_12163185_INS	7,45E-05	37	23	50	27	0,223075083	2L:12163185	ZnT33D	upstream_gene_variant	4,127839064
X3L_1452153_SNP	7,46E-05	7	52	8	63	0,223075083	3L:1452153	Ptp61F	intron_variant	4,127296919	Ptp61F
X2R_10176830_SNP	7,48E-05	5	61	1	79	0,223211892	2R:14289325	Ih	intron_variant	4,126337446	Ih
X2R_10176830_SNP	7,48E-05	5	61	1	79	0,223211892	2R:14289325	Ih	upstream_gene_variant	4,126337446
X2L_4376294_SNP	7,49E-05	39	22	42	32	0,223351515	2L:4376294	CG17612	downstream_gene_variant	4,12537377
X2L_4376294_SNP	7,49E-05	39	22	42	32	0,223351515	2L:4376294	Traf4	intron_variant	4,12537377	Traf4
X2L_17944162_SNP	7,51E-05	50	14	47	27	0,223591856	2L:17944162	CR44398	downstream_gene_variant	4,124166553
X2L_17944162_SNP	7,51E-05	50	14	47	27	0,223591856	2L:17944162	CR44399	upstream_gene_variant	4,124166553
X2R_14285181_SNP	7,53E-05	43	22	44	31	0,223591856	2R:18397676	CR43687	upstream_gene_variant	4,123091245
X2R_14285181_SNP	7,53E-05	43	22	44	31	0,223591856	2R:18397676	CR43688	upstream_gene_variant	4,123091245
X2R_14285181_SNP	7,53E-05	43	22	44	31	0,223591856	2R:18397676	GstE1	upstream_gene_variant	4,123091245
X2R_14285181_SNP	7,53E-05	43	22	44	31	0,223591856	2R:18397676	GstE10	5_prime_UTR_variant	4,123091245	GstE10
X2R_14285181_SNP	7,53E-05	43	22	44	31	0,223591856	2R:18397676	GstE10	upstream_gene_variant	4,123091245
X2R_14285181_SNP	7,53E-05	43	22	44	31	0,223591856	2R:18397676	GstE2	upstream_gene_variant	4,123091245
X2R_14285181_SNP	7,53E-05	43	22	44	31	0,223591856	2R:18397676	GstE3	upstream_gene_variant	4,123091245
X2R_14285181_SNP	7,53E-05	43	22	44	31	0,223591856	2R:18397676	Idgf5	downstream_gene_variant	4,123091245
X3R_14369965_SNP	7,55E-05	20	37	32	40	0,223591856	3R:18544243	fru	intron_variant	4,122149927	fru
X2R_15894108_SNP	7,57E-05	16	40	26	44	0,223591856	2R:20006603	CG16898	upstream_gene_variant	4,120867233
X2R_15894108_SNP	7,57E-05	16	40	26	44	0,223591856	2R:20006603	CR44628	upstream_gene_variant	4,120867233
X2L_14435518_SNP	7,57E-05	5	57	2	73	0,223591856	2L:14435518	CR44732	upstream_gene_variant	4,1208023
X2R_10309315_SNP	7,58E-05	40	26	50	27	0,223591856	2R:14421810	CG17386	missense_variant	4,120237758	CG17386
X2R_14285002_SNP	7,61E-05	25	40	35	43	0,223591856	2R:18397497	CR43687	upstream_gene_variant	4,118837512
X2R_14285002_SNP	7,61E-05	25	40	35	43	0,223591856	2R:18397497	CR43688	upstream_gene_variant	4,118837512
X2R_14285002_SNP	7,61E-05	25	40	35	43	0,223591856	2R:18397497	GstE1	upstream_gene_variant	4,118837512
X2R_14285002_SNP	7,61E-05	25	40	35	43	0,223591856	2R:18397497	GstE10	5_prime_UTR_variant	4,118837512	GstE10
X2R_14285002_SNP	7,61E-05	25	40	35	43	0,223591856	2R:18397497	GstE2	upstream_gene_variant	4,118837512
X2R_14285002_SNP	7,61E-05	25	40	35	43	0,223591856	2R:18397497	GstE3	upstream_gene_variant	4,118837512
X2R_14285002_SNP	7,61E-05	25	40	35	43	0,223591856	2R:18397497	Idgf5	downstream_gene_variant	4,118837512
X2L_14439399_SNP	7,61E-05	58	5	71	8	0,223591856	2L:14439399	-	intergenic_variant	4,118495344
X_10683780_SNP	7,61E-05	49	15	53	21	0,223591856	X:10789747	Ant2	upstream_gene_variant	4,118426087
X_10683780_SNP	7,61E-05	49	15	53	21	0,223591856	X:10789747	CR45204	downstream_gene_variant	4,118426087
X_10683780_SNP	7,61E-05	49	15	53	21	0,223591856	X:10789747	Imp	3_prime_UTR_variant	4,118426087	Imp
X_10683780_SNP	7,61E-05	49	15	53	21	0,223591856	X:10789747	Imp	downstream_gene_variant	4,118426087
X_10683780_SNP	7,61E-05	49	15	53	21	0,223591856	X:10789747	sesB	upstream_gene_variant	4,118426087
X2R_2758397_SNP	7,64E-05	63	6	64	NA	0,223591856	2R:6870892	CG9447	downstream_gene_variant	4,11717907
X2R_2758397_SNP	7,64E-05	63	6	64	NA	0,223591856	2R:6870892	coro	intron_variant	4,11717907	coro
X2R_2758397_SNP	7,64E-05	63	6	64	NA	0,223591856	2R:6870892	coro	upstream_gene_variant	4,11717907
X2R_2758397_SNP	7,64E-05	63	6	64	NA	0,223591856	2R:6870892	CR44169	upstream_gene_variant	4,11717907
X3L_1235353_SNP	7,65E-05	61	4	70	7	0,223591856	3L:1235353	CG33965	downstream_gene_variant	4,116473416
X3L_1235353_SNP	7,65E-05	61	4	70	7	0,223591856	3L:1235353	CG33966	3_prime_UTR_variant	4,116473416	CG33966
X3L_1235353_SNP	7,65E-05	61	4	70	7	0,223591856	3L:1235353	CG9192	downstream_gene_variant	4,116473416
X3L_1235353_SNP	7,65E-05	61	4	70	7	0,223591856	3L:1235353	CG9194	upstream_gene_variant	4,116473416
X3L_1235353_SNP	7,65E-05	61	4	70	7	0,223591856	3L:1235353	CR45747	upstream_gene_variant	4,116473416
X3L_1235353_SNP	7,65E-05	61	4	70	7	0,223591856	3L:1235353	mwh	downstream_gene_variant	4,116473416
X_2418637_SNP	7,65E-05	5	62	3	77	0,223591856	X:2524604	trol	intron_variant	4,116244279	trol
X3L_16176518_SNP	7,67E-05	11	55	19	60	0,223591856	3L:16183418	-	intergenic_variant	4,115069273
X2R_10210616_SNP	7,69E-05	13	39	14	49	0,223591856	2R:14323111	Shroom	intron_variant	4,114011542	Shroom
X2L_19908911_SNP	7,70E-05	20	42	24	49	0,223591856	2L:19908911	CR43097	downstream_gene_variant	4,113761521
X2L_19908911_SNP	7,70E-05	20	42	24	49	0,223591856	2L:19908911	sick	intron_variant	4,113761521	sick
X2L_19908911_SNP	7,70E-05	20	42	24	49	0,223591856	2L:19908911	TotF	downstream_gene_variant	4,113761521
X2L_19908911_SNP	7,70E-05	20	42	24	49	0,223591856	2L:19908911	Victoria	downstream_gene_variant	4,113761521
X3R_13398075_SNP	7,73E-05	5	60	78	NA	0,223591856	3R:17572353	Hmx	downstream_gene_variant	4,11207582
X2R_14523110_SNP	7,74E-05	41	24	39	38	0,223591856	2R:18635605	CG30122	intron_variant	4,111288611	CG30122
X2R_14523110_SNP	7,74E-05	41	24	39	38	0,223591856	2R:18635605	CG5482	upstream_gene_variant	4,111288611
X2R_14523110_SNP	7,74E-05	41	24	39	38	0,223591856	2R:18635605	CheA56a	upstream_gene_variant	4,111288611
X2R_14523110_SNP	7,74E-05	41	24	39	38	0,223591856	2R:18635605	tRNA:CR30227	upstream_gene_variant	4,111288611
X2R_14523110_SNP	7,74E-05	41	24	39	38	0,223591856	2R:18635605	tRNA:G3:55E	downstream_gene_variant	4,111288611
X_10866759_SNP	7,78E-05	65	2	72	8	0,223591856	X:10972726	CG42339	intron_variant	4,109200522	CG42339
X2R_12198157_SNP	7,79E-05	3	63	8	71	0,223591856	2R:16310652	CR45232	upstream_gene_variant	4,108740323
X2R_12198157_SNP	7,79E-05	3	63	8	71	0,223591856	2R:16310652	Nox	intron_variant	4,108740323	Nox
X2L_14433861_SNP	7,80E-05	46	17	56	20	0,223591856	2L:14433861	CR44732	upstream_gene_variant	4,107808416
X_22204236_SNP	7,80E-05	46	3	52	5	0,223591856	X:22802400	CR44997	downstream_gene_variant	4,107753922
X_22204236_SNP	7,80E-05	46	3	52	5	0,223591856	X:22802400	CR45464	downstream_gene_variant	4,107753922
X2R_10734508_SNP	7,81E-05	3	64	8	69	0,223591856	2R:14847003	CG10209	synonymous_variant	4,107534957	CG10209
X2R_10734508_SNP	7,81E-05	3	64	8	69	0,223591856	2R:14847003	NaPi-T	upstream_gene_variant	4,107534957
X2R_10734508_SNP	7,81E-05	3	64	8	69	0,223591856	2R:14847003	SMC2	downstream_gene_variant	4,107534957
X3L_13310810_SNP	7,82E-05	9	57	8	72	0,223591856	3L:13317710	-	intergenic_variant	4,106884447
X3L_7612730_SNP	7,83E-05	4	51	8	49	0,223591856	3L:7619630	CG33275	intron_variant	4,106284665	CG33275
X2R_10735042_SNP	7,83E-05	64	3	69	8	0,223591856	2R:14847537	CG10209	synonymous_variant	4,106263919	CG10209
X2R_10735042_SNP	7,83E-05	64	3	69	8	0,223591856	2R:14847537	NaPi-T	upstream_gene_variant	4,106263919
X2R_10735042_SNP	7,83E-05	64	3	69	8	0,223591856	2R:14847537	SMC2	downstream_gene_variant	4,106263919
X2R_10734385_SNP	7,84E-05	63	3	70	6	0,223591856	2R:14846880	CG10209	synonymous_variant	4,105795517	CG10209
X2R_10734385_SNP	7,84E-05	63	3	70	6	0,223591856	2R:14846880	NaPi-T	upstream_gene_variant	4,105795517
X2R_10734385_SNP	7,84E-05	63	3	70	6	0,223591856	2R:14846880	SMC2	downstream_gene_variant	4,105795517
X2L_16915647_SNP	7,87E-05	19	44	13	61	0,223591856	2L:16915647	tweek	intron_variant	4,103755504	tweek
X_21057670_SNP	7,88E-05	32	34	28	50	0,223591856	X:21186643	CR45506	upstream_gene_variant	4,103394702
X_21057775_SNP	7,90E-05	51	15	57	22	0,223591856	X:21186748	CR45506	upstream_gene_variant	4,102242035
X_7331771_SNP	7,90E-05	2	65	9	71	0,223591856	X:7437738	-	intergenic_variant	4,102163563
X2L_13886077_SNP	7,92E-05	47	14	46	27	0,223591856	2L:13886077	CenG1A	intron_variant	4,10144133	CenG1A
X2L_20966392_SNP	7,92E-05	6	61	3	76	0,223591856	2L:20966392	CG42238	3_prime_UTR_variant	4,101324392	CG42238
X2R_10104301_SNP	7,93E-05	9	56	17	56	0,223591856	2R:14216796	CG8468	upstream_gene_variant	4,100953494
X2R_10104301_SNP	7,93E-05	9	56	17	56	0,223591856	2R:14216796	mir-308	upstream_gene_variant	4,100953494
X2R_10104301_SNP	7,93E-05	9	56	17	56	0,223591856	2R:14216796	RpS23	upstream_gene_variant	4,100953494
X2R_10104301_SNP	7,93E-05	9	56	17	56	0,223591856	2R:14216796	Sox15	upstream_gene_variant	4,100953494
X2L_9171907_SNP	7,93E-05	67	5	72	NA	0,223591856	2L:9171907	tai	intron_variant	4,100640674	tai
X2L_9171907_SNP	7,93E-05	67	5	72	NA	0,223591856	2L:9171907	tai	upstream_gene_variant	4,100640674
X2L_1112126_SNP	7,93E-05	5	57	4	74	0,223591856	2L:1112126	CG14339	synonymous_variant	4,100530466	CG14339
X2L_1112126_SNP	7,93E-05	5	57	4	74	0,223591856	2L:1112126	CG14340	upstream_gene_variant	4,100530466
X2L_1112126_SNP	7,93E-05	5	57	4	74	0,223591856	2L:1112126	mtRNApol	upstream_gene_variant	4,100530466
X2L_1112126_SNP	7,93E-05	5	57	4	74	0,223591856	2L:1112126	Pino	downstream_gene_variant	4,100530466
X2R_7476398_SNP	7,94E-05	42	21	46	32	0,223591856	2R:11588893	tou	synonymous_variant	4,100440043	tou
X2R_7476398_SNP	7,94E-05	42	21	46	32	0,223591856	2R:11588893	snoRNA:Psi28S-1180	downstream_gene_variant	4,100440043
X2R_7476398_SNP	7,94E-05	42	21	46	32	0,223591856	2R:11588893	snoRNA:Psi28S-1936	upstream_gene_variant	4,100440043
X3L_1233379_SNP	7,94E-05	61	5	73	6	0,223591856	3L:1233379	CG33965	synonymous_variant	4,10004469	CG33965
X3L_1233379_SNP	7,94E-05	61	5	73	6	0,223591856	3L:1233379	CG33966	upstream_gene_variant	4,10004469
X3L_1233379_SNP	7,94E-05	61	5	73	6	0,223591856	3L:1233379	CG9192	downstream_gene_variant	4,10004469
X3L_1233379_SNP	7,94E-05	61	5	73	6	0,223591856	3L:1233379	CG9194	upstream_gene_variant	4,10004469
X3L_1233379_SNP	7,94E-05	61	5	73	6	0,223591856	3L:1233379	CR45747	upstream_gene_variant	4,10004469
X3L_1233379_SNP	7,94E-05	61	5	73	6	0,223591856	3L:1233379	mwh	downstream_gene_variant	4,10004469
X3R_18321282_SNP	7,99E-05	3	64	5	74	0,224315112	3R:22495560	CG7045	downstream_gene_variant	4,097446372
X3R_18321282_SNP	7,99E-05	3	64	5	74	0,224315112	3R:22495560	CG7046	downstream_gene_variant	4,097446372
X3R_18321282_SNP	7,99E-05	3	64	5	74	0,224315112	3R:22495560	Octbeta1R	upstream_gene_variant	4,097446372
X3R_18321282_SNP	7,99E-05	3	64	5	74	0,224315112	3R:22495560	T-cp1	upstream_gene_variant	4,097446372
X2R_15861441_SNP	7,99E-05	57	9	71	9	0,224315112	2R:19973936	-	intergenic_variant	4,09733795
X2L_12851340_SNP	8,02E-05	59	7	67	9	0,22467349	2L:12851340	-	intergenic_variant	4,095994021
X2L_7442421_DEL	8,03E-05	44	18	50	28	0,224768736	2L:7442421	CG5973	intron_variant	4,095160296	CG5973
X2L_7442421_DEL	8,03E-05	44	18	50	28	0,224768736	2L:7442421	CG5973	upstream_gene_variant	4,095160296
X2L_7442421_DEL	8,03E-05	44	18	50	28	0,224768736	2L:7442421	santa-maria	downstream_gene_variant	4,095160296
X3L_2317408_SNP	8,10E-05	1	64	6	72	0,225941951	3L:2317408	CR45426	downstream_gene_variant	4,091740927
X3L_2317408_SNP	8,10E-05	1	64	6	72	0,225941951	3L:2317408	CR45427	non_coding_transcript_exon_variant	4,091740927	CR45427
X2L_16915646_SNP	8,10E-05	19	44	11	62	0,225941951	2L:16915646	tweek	intron_variant	4,091602921	tweek
X3L_19783336_SNP	8,13E-05	23	38	37	39	0,22646858	3L:19790236	CG42637	5_prime_UTR_variant	4,089945086	CG42637
X3L_19783336_SNP	8,13E-05	23	38	37	39	0,22646858	3L:19790236	Gyc76C	5_prime_UTR_variant	4,089945086	Gyc76C
X3L_19783336_SNP	8,13E-05	23	38	37	39	0,22646858	3L:19790236	HLH106	upstream_gene_variant	4,089945086
X2R_13514546_INS	8,15E-05	62	5	71	7	0,226654751	2R:17627041	CG10936	intron_variant	4,088942424	CG10936
X2R_13514546_INS	8,15E-05	62	5	71	7	0,226654751	2R:17627041	rhi	downstream_gene_variant	4,088942424
X3L_3214084_SNP	8,17E-05	30	35	38	41	0,226907143	3L:3214084	CG14967	synonymous_variant	4,087814251	CG14967
X3L_3214084_SNP	8,17E-05	30	35	38	41	0,226907143	3L:3214084	gry	downstream_gene_variant	4,087814251
X2L_8343906_SNP	8,22E-05	8	54	6	68	0,227547658	2L:8343906	CG14273	intron_variant	4,085335129	CG14273
X2L_8343906_SNP	8,22E-05	8	54	6	68	0,227547658	2L:8343906	CG14274	downstream_gene_variant	4,085335129
X2L_8343906_SNP	8,22E-05	8	54	6	68	0,227547658	2L:8343906	CG7778	upstream_gene_variant	4,085335129
X2L_8343906_SNP	8,22E-05	8	54	6	68	0,227547658	2L:8343906	CR45371	non_coding_transcript_exon_variant	4,085335129	CR45371
X2R_17914210_DEL	8,22E-05	59	7	71	7	0,227547658	2R:22026705	CG34370	intron_variant	4,085009322	CG34370
X_12341673_SNP	8,23E-05	58	8	69	10	0,227547658	X:12447640	Pkcdelta	synonymous_variant	4,084661276	Pkcdelta
X_12341673_SNP	8,23E-05	58	8	69	10	0,227547658	X:12447640	Pkcdelta	intron_variant	4,084661276	Pkcdelta
X2R_3819100_SNP	8,28E-05	6	60	5	72	0,228551484	2R:7931595	CG30381	upstream_gene_variant	4,082108576
X2R_3819100_SNP	8,28E-05	6	60	5	72	0,228551484	2R:7931595	CG8791	downstream_gene_variant	4,082108576
X2R_3819100_SNP	8,28E-05	6	60	5	72	0,228551484	2R:7931595	drosha	upstream_gene_variant	4,082108576
X2R_3819100_SNP	8,28E-05	6	60	5	72	0,228551484	2R:7931595	rnh1	intron_variant	4,082108576	rnh1
X2L_21608484_SNP	8,32E-05	65	1	71	6	0,229356847	2L:21608484	-	intergenic_variant	4,079940831
X2L_9918275_DEL	8,34E-05	5	60	1	77	0,229662835	2L:9918275	CG4592	upstream_gene_variant	4,078722682
X2L_9918275_DEL	8,34E-05	5	60	1	77	0,229662835	2L:9918275	CG4594	upstream_gene_variant	4,078722682
X2L_9918275_DEL	8,34E-05	5	60	1	77	0,229662835	2L:9918275	CG4598	upstream_gene_variant	4,078722682
X2L_9918275_DEL	8,34E-05	5	60	1	77	0,229662835	2L:9918275	CG5885	upstream_gene_variant	4,078722682
X2L_9918275_DEL	8,34E-05	5	60	1	77	0,229662835	2L:9918275	Srp54	downstream_gene_variant	4,078722682
X2L_9918275_DEL	8,34E-05	5	60	1	77	0,229662835	2L:9918275	TbCMF46	downstream_gene_variant	4,078722682
X2L_9918275_DEL	8,34E-05	5	60	1	77	0,229662835	2L:9918275	yip2	downstream_gene_variant	4,078722682
X2R_10897658_SNP	8,36E-05	51	14	68	10	0,229700229	2R:15010153	CG43101	downstream_gene_variant	4,077831907
X2R_10897658_SNP	8,36E-05	51	14	68	10	0,229700229	2R:15010153	hbs	upstream_gene_variant	4,077831907
X3L_8244833_SNP	8,37E-05	33	32	44	33	0,229700229	3L:8251733	Dscam4	intron_variant	4,077376512	Dscam4
X2R_10516851_SNP	8,46E-05	56	9	60	16	0,231449417	2R:14629346	CG10131	upstream_gene_variant	4,072474428
X2R_10516851_SNP	8,46E-05	56	9	60	16	0,231449417	2R:14629346	Uhg5	downstream_gene_variant	4,072474428
X3R_10622792_SNP	8,47E-05	37	24	47	23	0,231449417	3R:14797070	CG14855	missense_variant	4,072291727	CG14855
X3R_10622792_SNP	8,47E-05	37	24	47	23	0,231449417	3R:14797070	CG14856	upstream_gene_variant	4,072291727
X3R_10622792_SNP	8,47E-05	37	24	47	23	0,231449417	3R:14797070	CG14857	upstream_gene_variant	4,072291727
X3R_10622792_SNP	8,47E-05	37	24	47	23	0,231449417	3R:14797070	jvl	downstream_gene_variant	4,072291727
X2R_12821356_SNP	8,48E-05	6	59	11	68	0,231449417	2R:16933851	CG43788	upstream_gene_variant	4,071808181
X2R_12821356_SNP	8,48E-05	6	59	11	68	0,231449417	2R:16933851	CG43789	upstream_gene_variant	4,071808181
X2R_12821356_SNP	8,48E-05	6	59	11	68	0,231449417	2R:16933851	Pkc53E	intron_variant	4,071808181	Pkc53E
X2R_17906923_SNP	8,50E-05	65	1	73	6	0,231449417	2R:22019418	CG34370	intron_variant	4,070694465	CG34370
X3L_885475_SNP	8,50E-05	16	50	11	67	0,231449417	3L:885475	CG13907	upstream_gene_variant	4,070594257
X3L_885475_SNP	8,50E-05	16	50	11	67	0,231449417	3L:885475	CG32479	intron_variant	4,070594257	CG32479
X3L_885475_SNP	8,50E-05	16	50	11	67	0,231449417	3L:885475	CG32479	upstream_gene_variant	4,070594257
X3L_885475_SNP	8,50E-05	16	50	11	67	0,231449417	3L:885475	snoRNA:CG32479-b	upstream_gene_variant	4,070594257
X2R_13541318_SNP	8,51E-05	63	3	73	5	0,231449417	2R:17653813	CCHa1-R	intron_variant	4,070277787	CCHa1-R
X2L_12567172_SNP	8,52E-05	55	9	64	12	0,231598244	2L:12567172	CR44597	downstream_gene_variant	4,069343414
X2L_12567172_SNP	8,52E-05	55	9	64	12	0,231598244	2L:12567172	CR44598	downstream_gene_variant	4,069343414
X2R_13855385_SNP	8,54E-05	60	5	56	23	0,231598244	2R:17967880	-	intergenic_variant	4,068737962
X2R_10104529_SNP	8,55E-05	54	11	57	19	0,231670968	2R:14217024	CG8468	upstream_gene_variant	4,067942312
X2R_10104529_SNP	8,55E-05	54	11	57	19	0,231670968	2R:14217024	mir-308	upstream_gene_variant	4,067942312
X2R_10104529_SNP	8,55E-05	54	11	57	19	0,231670968	2R:14217024	RpS23	upstream_gene_variant	4,067942312
X2R_10104529_SNP	8,55E-05	54	11	57	19	0,231670968	2R:14217024	Sox15	upstream_gene_variant	4,067942312
X2R_10676777_SNP	8,59E-05	64	2	70	9	0,231670968	2R:14789272	kn	intron_variant	4,06616931	kn
X_11829877_INS	8,60E-05	25	39	23	52	0,231670968	X:11935844	cac	3_prime_UTR_variant	4,065570183	cac
X_11829877_INS	8,60E-05	25	39	23	52	0,231670968	X:11935844	CG10362	upstream_gene_variant	4,065570183
X2R_10254286_SNP	8,60E-05	6	59	4	74	0,231670968	2R:14366781	Arc2	downstream_gene_variant	4,065548617
X2R_10254286_SNP	8,60E-05	6	59	4	74	0,231670968	2R:14366781	CG34184	downstream_gene_variant	4,065548617
X2R_10254286_SNP	8,60E-05	6	59	4	74	0,231670968	2R:14366781	CG34442	upstream_gene_variant	4,065548617
X2R_10254286_SNP	8,60E-05	6	59	4	74	0,231670968	2R:14366781	CG34443	upstream_gene_variant	4,065548617
X2R_10254286_SNP	8,60E-05	6	59	4	74	0,231670968	2R:14366781	CG34444	upstream_gene_variant	4,065548617
X2R_10254286_SNP	8,60E-05	6	59	4	74	0,231670968	2R:14366781	Obp50a	downstream_gene_variant	4,065548617
X2R_10254286_SNP	8,60E-05	6	59	4	74	0,231670968	2R:14366781	Obp50b	upstream_gene_variant	4,065548617
X2R_10254286_SNP	8,60E-05	6	59	4	74	0,231670968	2R:14366781	Obp50c	upstream_gene_variant	4,065548617
X2R_10254286_SNP	8,60E-05	6	59	4	74	0,231670968	2R:14366781	Tfb1	downstream_gene_variant	4,065548617
X2R_10735183_SNP	8,60E-05	1	61	9	65	0,231670968	2R:14847678	CG10209	synonymous_variant	4,065465898	CG10209
X2R_10735183_SNP	8,60E-05	1	61	9	65	0,231670968	2R:14847678	NaPi-T	upstream_gene_variant	4,065465898
X2R_10735183_SNP	8,60E-05	1	61	9	65	0,231670968	2R:14847678	SMC2	downstream_gene_variant	4,065465898
X2R_15894055_SNP	8,63E-05	18	46	27	52	0,231884061	2R:20006550	CG16898	upstream_gene_variant	4,063838762
X2R_15894055_SNP	8,63E-05	18	46	27	52	0,231884061	2R:20006550	CR44628	upstream_gene_variant	4,063838762
X4_452157_SNP	8,63E-05	20	42	12	65	0,231884061	4:431531	CR43437	downstream_gene_variant	4,06381864
X4_452157_SNP	8,63E-05	20	42	12	65	0,231884061	4:431531	CR44024	non_coding_transcript_exon_variant	4,06381864	CR44024
X2R_10372142_SNP	8,65E-05	48	17	58	19	0,232049396	2R:14484637	L	intron_variant	4,062886451	L
X2L_7068643_SNP	8,69E-05	55	10	57	17	0,232634764	2L:7068643	CG11289	splice_region_variant,intron_variant	4,061170525	CG11289
X2L_7068643_SNP	8,69E-05	55	10	57	17	0,232634764	2L:7068643	Nuf2	upstream_gene_variant	4,061170525
X2L_7068643_SNP	8,69E-05	55	10	57	17	0,232634764	2L:7068643	Pvf2	downstream_gene_variant	4,061170525
X2L_7068643_SNP	8,69E-05	55	10	57	17	0,232634764	2L:7068643	Sem1	downstream_gene_variant	4,061170525
X_13492590_SNP	8,73E-05	12	44	18	58	0,232798694	X:13598557	up	intron_variant	4,05890756	up
X2R_11676499_SNP	8,74E-05	67	5	75	NA	0,232798694	2R:15788994	Zasp52	intron_variant	4,058675642	Zasp52
X2R_4104596_SNP	8,74E-05	10	57	12	64	0,232798694	2R:8217091	LRP1	synonymous_variant	4,05849781	LRP1
X2R_10734459_SNP	8,74E-05	64	3	68	8	0,232798694	2R:14846954	CG10209	missense_variant	4,058328842	CG10209
X2R_10734459_SNP	8,74E-05	64	3	68	8	0,232798694	2R:14846954	NaPi-T	upstream_gene_variant	4,058328842
X2R_10734459_SNP	8,74E-05	64	3	68	8	0,232798694	2R:14846954	SMC2	downstream_gene_variant	4,058328842
X2L_9303748_INS	8,76E-05	7	53	9	61	0,232798694	2L:9303748	CR42844	downstream_gene_variant	4,057251994
X2L_9303748_INS	8,76E-05	7	53	9	61	0,232798694	2L:9303748	Ggamma30A	downstream_gene_variant	4,057251994
X3L_1228404_SNP	8,77E-05	21	44	19	61	0,232798694	3L:1228404	CG33965	upstream_gene_variant	4,057152659
X3L_1228404_SNP	8,77E-05	21	44	19	61	0,232798694	3L:1228404	LysS	downstream_gene_variant	4,057152659
X3L_1228404_SNP	8,77E-05	21	44	19	61	0,232798694	3L:1228404	mwh	intron_variant	4,057152659	mwh
X_19229698_SNP	8,85E-05	7	59	6	66	0,234573015	X:19335665	nAChRalpha7	intron_variant	4,053239564	ChRalpha7
X2R_6809282_SNP	8,87E-05	2	61	6	72	0,234585013	2R:10921777	-	intergenic_variant	4,052241169
X2R_10344050_SNP	8,87E-05	6	61	1	79	0,234585013	2R:14456545	Oaz	intron_variant	4,051988796	Oaz
X2R_10344050_SNP	8,87E-05	6	61	1	79	0,234585013	2R:14456545	Oaz	upstream_gene_variant	4,051988796
X2R_19314671_SNP	8,90E-05	45	22	58	21	0,234953914	2R:23427148	CG9815	intron_variant	4,050693396	CG9815
X2R_19314671_SNP	8,90E-05	45	22	58	21	0,234953914	2R:23427148	CG9815	upstream_gene_variant	4,050693396
X2L_17804869_SNP	8,93E-05	60	1	66	7	0,2355011	2L:17804869	CadN2	intron_variant	4,049071027	CadN2
X2R_10372133_SNP	8,96E-05	47	17	56	19	0,236023849	2R:14484628	L	intron_variant	4,047461817	L
X2R_7475991_SNP	8,98E-05	43	22	46	31	0,236023849	2R:11588486	tou	synonymous_variant	4,046886433	tou
X2R_7475991_SNP	8,98E-05	43	22	46	31	0,236023849	2R:11588486	snoRNA:Psi28S-1180	downstream_gene_variant	4,046886433
X2R_7475991_SNP	8,98E-05	43	22	46	31	0,236023849	2R:11588486	snoRNA:Psi28S-1936	upstream_gene_variant	4,046886433
X_7331220_SNP	9,04E-05	65	2	70	9	0,23689642	X:7437187	-	intergenic_variant	4,043766574
X2R_10573854_SNP	9,04E-05	36	29	48	29	0,23689642	2R:14686349	mspo	intron_variant	4,043630419	mspo
X2R_15894034_SNP	9,05E-05	17	47	27	52	0,23689642	2R:20006529	CG16898	upstream_gene_variant	4,043457776
X2R_15894034_SNP	9,05E-05	17	47	27	52	0,23689642	2R:20006529	CR44628	upstream_gene_variant	4,043457776
X_5447460_SNP	9,06E-05	41	23	44	34	0,236901042	X:5553427	Vsx2	intron_variant	4,042842323	Vsx2
X3L_16232190_SNP	9,08E-05	5	59	9	71	0,23702727	3L:16239090	l(3)72Dr	missense_variant	4,042004846	l(3)72Dr
X3L_16232190_SNP	9,08E-05	5	59	9	71	0,23702727	3L:16239090	Hsc20	downstream_gene_variant	4,042004846
X3L_16232190_SNP	9,08E-05	5	59	9	71	0,23702727	3L:16239090	l(3)72Dp	downstream_gene_variant	4,042004846
X2R_7982903_SNP	9,09E-05	4	63	6	73	0,237082096	2R:12095398	jeb	intron_variant	4,041299113	jeb
X2R_15220811_SNP	9,11E-05	25	39	31	46	0,237309865	2R:19333306	CG34045	intron_variant	4,040277634	CG34045
X2R_15220811_SNP	9,11E-05	25	39	31	46	0,237309865	2R:19333306	Rgk1	intron_variant	4,040277634	Rgk1
X3L_3213571_SNP	9,14E-05	37	29	38	37	0,237659985	3L:3213571	CG14967	synonymous_variant	4,039033753	CG14967
X3L_3213571_SNP	9,14E-05	37	29	38	37	0,237659985	3L:3213571	CG32269	upstream_gene_variant	4,039033753
X3L_3213571_SNP	9,14E-05	37	29	38	37	0,237659985	3L:3213571	CG32270	upstream_gene_variant	4,039033753
X3L_3213571_SNP	9,14E-05	37	29	38	37	0,237659985	3L:3213571	gry	downstream_gene_variant	4,039033753
X3L_2263668_SNP	9,16E-05	4	63	7	72	0,237860376	3L:2263668	ecd	missense_variant	4,038023933	ecd
X3L_2263668_SNP	9,16E-05	4	63	7	72	0,237860376	3L:2263668	CG13806	upstream_gene_variant	4,038023933
X3L_2263668_SNP	9,16E-05	4	63	7	72	0,237860376	3L:2263668	CG13807	downstream_gene_variant	4,038023933
X3L_2263668_SNP	9,16E-05	4	63	7	72	0,237860376	3L:2263668	CG2034	downstream_gene_variant	4,038023933
X3L_2263668_SNP	9,16E-05	4	63	7	72	0,237860376	3L:2263668	CR45829	downstream_gene_variant	4,038023933
X3L_2263668_SNP	9,16E-05	4	63	7	72	0,237860376	3L:2263668	obst-I	upstream_gene_variant	4,038023933
X3L_2263668_SNP	9,16E-05	4	63	7	72	0,237860376	3L:2263668	oxt	upstream_gene_variant	4,038023933
X2R_13748987_INS	9,18E-05	19	42	22	51	0,237860376	2R:17861482	CG14490	frameshift_variant	4,037032773	CG14490
X2R_13748987_INS	9,18E-05	19	42	22	51	0,237860376	2R:17861482	Mapmodulin	downstream_gene_variant	4,037032773
X2R_13748987_INS	9,18E-05	19	42	22	51	0,237860376	2R:17861482	olf186-F	downstream_gene_variant	4,037032773
X2R_13748987_INS	9,18E-05	19	42	22	51	0,237860376	2R:17861482	thr	3_prime_UTR_variant	4,037032773	thr
X2R_13748987_INS	9,18E-05	19	42	22	51	0,237860376	2R:17861482	thr	downstream_gene_variant	4,037032773
X_21070746_SNP	9,21E-05	62	4	73	7	0,237860376	X:21199719	CG1724	downstream_gene_variant	4,035643383
X2R_18930994_SNP	9,23E-05	29	36	12	63	0,237860376	2R:23043471	CG42741	upstream_gene_variant	4,034568038
X2R_18930994_SNP	9,23E-05	29	36	12	63	0,237860376	2R:23043471	twi	intron_variant	4,034568038	twi
X2R_18930994_SNP	9,23E-05	29	36	12	63	0,237860376	2R:23043471	twi	upstream_gene_variant	4,034568038
X_19870057_SNP	9,24E-05	35	21	44	25	0,237860376	X:19976024	-	intergenic_variant	4,034357641
X_12045745_SNP	9,26E-05	4	62	8	72	0,237860376	X:12151712	Ten-a	intron_variant	4,033383198	Ten-a
X2L_11746558_SNP	9,29E-05	66	5	72	NA	0,237860376	2L:11746558	CR44144	upstream_gene_variant	4,031940625
X2L_11746558_SNP	9,29E-05	66	5	72	NA	0,237860376	2L:11746558	Vha100-5	downstream_gene_variant	4,031940625
X3L_3214087_SNP	9,31E-05	35	29	41	36	0,237860376	3L:3214087	CG14967	synonymous_variant	4,031074577	CG14967
X3L_3214087_SNP	9,31E-05	35	29	41	36	0,237860376	3L:3214087	gry	downstream_gene_variant	4,031074577
X3L_2383700_SNP	9,32E-05	4	63	6	70	0,237860376	3L:2383700	CG45186	intron_variant	4,030358099	CG45186
X3L_2383700_SNP	9,32E-05	4	63	6	70	0,237860376	3L:2383700	CG45186	upstream_gene_variant	4,030358099
X2L_18204756_SNP	9,33E-05	55	8	63	12	0,237860376	2L:18204756	CG42750	synonymous_variant	4,030251737	CG42750
X2L_18204756_SNP	9,33E-05	55	8	63	12	0,237860376	2L:18204756	CG31802	downstream_gene_variant	4,030251737
X2L_18204756_SNP	9,33E-05	55	8	63	12	0,237860376	2L:18204756	CR43413	downstream_gene_variant	4,030251737
X2R_10944169_SNP	9,33E-05	30	31	33	43	0,237860376	2R:15056664	CG33467	upstream_gene_variant	4,030138279
X2L_19925887_SNP	9,33E-05	54	10	61	11	0,237860376	2L:19925887	sick	synonymous_variant	4,029954119	sick
X2L_19925887_SNP	9,33E-05	54	10	61	11	0,237860376	2L:19925887	CR43827	downstream_gene_variant	4,029954119
X2L_19925887_SNP	9,33E-05	54	10	61	11	0,237860376	2L:19925887	CR43828	downstream_gene_variant	4,029954119
X2R_7841421_SNP	9,35E-05	64	3	72	7	0,237860376	2R:11953916	CG13188	intron_variant	4,029300205	CG13188
X3L_8244847_SNP	9,36E-05	34	32	48	30	0,237860376	3L:8251747	Dscam4	intron_variant	4,028838076	Dscam4
X2L_17045233_SNP	9,36E-05	41	21	42	33	0,237860376	2L:17045233	CG15136	downstream_gene_variant	4,028679193
X2L_17045233_SNP	9,36E-05	41	21	42	33	0,237860376	2L:17045233	CR43802	upstream_gene_variant	4,028679193
X3L_1233248_SNP	9,38E-05	5	61	7	72	0,237860376	3L:1233248	CG33965	intron_variant	4,027964476	CG33965
X3L_1233248_SNP	9,38E-05	5	61	7	72	0,237860376	3L:1233248	CG33966	upstream_gene_variant	4,027964476
X3L_1233248_SNP	9,38E-05	5	61	7	72	0,237860376	3L:1233248	CG9192	downstream_gene_variant	4,027964476
X3L_1233248_SNP	9,38E-05	5	61	7	72	0,237860376	3L:1233248	CG9194	upstream_gene_variant	4,027964476
X3L_1233248_SNP	9,38E-05	5	61	7	72	0,237860376	3L:1233248	CR45747	upstream_gene_variant	4,027964476
X3L_1233248_SNP	9,38E-05	5	61	7	72	0,237860376	3L:1233248	mwh	downstream_gene_variant	4,027964476
X2R_10787362_SNP	9,38E-05	12	54	11	69	0,237860376	2R:14899857	Cyp317a1	synonymous_variant	4,027717672	Cyp317a1
X2R_10787362_SNP	9,38E-05	12	54	11	69	0,237860376	2R:14899857	CG10249	downstream_gene_variant	4,027717672
X2L_13326235_SNP	9,39E-05	57	5	71	6	0,237860376	2L:13326235	CG43778	intron_variant	4,027558967	CG43778
X3L_12422198_SNP	9,39E-05	64	3	70	10	0,237860376	3L:12429098	toe	intron_variant	4,027355776	toe
X2L_5705934_SNP	9,41E-05	1	65	6	71	0,238056191	2L:5705934	CG7236	upstream_gene_variant	4,026411115
X2R_9631567_SNP	9,43E-05	35	25	24	45	0,238228064	2R:13744062	fas	intron_variant	4,025401181	fas
X_14638416_SNP	9,45E-05	64	3	71	8	0,238228064	X:14744383	NetB	intron_variant	4,02434058	NetB
X_14638417_SNP	9,45E-05	3	64	8	71	0,238228064	X:14744384	NetB	intron_variant	4,02434058	NetB
X_12806637_SNP	9,50E-05	65	1	72	6	0,238923892	X:12912604	Brms1	upstream_gene_variant	4,0224898
X_12806637_SNP	9,50E-05	65	1	72	6	0,238923892	X:12912604	CG4645	downstream_gene_variant	4,0224898
X_12806637_SNP	9,50E-05	65	1	72	6	0,238923892	X:12912604	CR45625	non_coding_transcript_exon_variant	4,0224898	CR45625
X_12806637_SNP	9,50E-05	65	1	72	6	0,238923892	X:12912604	CR45626	upstream_gene_variant	4,0224898
X_12806637_SNP	9,50E-05	65	1	72	6	0,238923892	X:12912604	fne	upstream_gene_variant	4,0224898
X_12806637_SNP	9,50E-05	65	1	72	6	0,238923892	X:12912604	mRpL49	downstream_gene_variant	4,0224898
X3L_22920602_SNP	9,52E-05	6	58	7	68	0,239024685	3L:22927502	CG12768	downstream_gene_variant	4,021190509
X2L_7068934_SNP	9,53E-05	34	18	38	28	0,239024685	2L:7068934	CG11289	missense_variant	4,020689505	CG11289
X2L_7068934_SNP	9,53E-05	34	18	38	28	0,239024685	2L:7068934	Nuf2	upstream_gene_variant	4,020689505
X2L_7068934_SNP	9,53E-05	34	18	38	28	0,239024685	2L:7068934	Pvf2	downstream_gene_variant	4,020689505
X2L_7068934_SNP	9,53E-05	34	18	38	28	0,239024685	2L:7068934	Sem1	downstream_gene_variant	4,020689505
X2R_6752877_SNP	9,56E-05	8	59	10	66	0,239024685	2R:10865372	CG30015	intron_variant	4,019733539	CG30015
X2R_6752877_SNP	9,56E-05	8	59	10	66	0,239024685	2R:10865372	CG30015	upstream_gene_variant	4,019733539
X3R_25366592_SNP	9,56E-05	57	6	72	6	0,239024685	3R:29540870	-	intergenic_variant	4,019719769
X2L_14410916_SNP	9,59E-05	12	51	18	59	0,239024685	2L:14410916	CR44733	downstream_gene_variant	4,018226455
X2L_14410916_SNP	9,59E-05	12	51	18	59	0,239024685	2L:14410916	elB	upstream_gene_variant	4,018226455
X2R_14317919_SNP	9,61E-05	67	74	6	NA	0,239024685	2R:18430414	CG12263	downstream_gene_variant	4,01716559
X2R_14317919_SNP	9,61E-05	67	74	6	NA	0,239024685	2R:18430414	CG30118	3_prime_UTR_variant	4,01716559	CG30118
X2R_14317919_SNP	9,61E-05	67	74	6	NA	0,239024685	2R:18430414	CG30118	downstream_gene_variant	4,01716559
X2R_14317919_SNP	9,61E-05	67	74	6	NA	0,239024685	2R:18430414	CG5174	downstream_gene_variant	4,01716559
X3R_12874837_SNP	9,62E-05	16	45	13	59	0,239024685	3R:17049115	Dad	upstream_gene_variant	4,016776174
X3R_12874837_SNP	9,62E-05	16	45	13	59	0,239024685	3R:17049115	Patr-1	downstream_gene_variant	4,016776174
X2R_7474883_SNP	9,62E-05	59	6	69	9	0,239024685	2R:11587378	snoRNA:Psi28S-1180	downstream_gene_variant	4,016634052
X2R_7474883_SNP	9,62E-05	59	6	69	9	0,239024685	2R:11587378	snoRNA:Psi28S-1936	downstream_gene_variant	4,016634052
X2R_7474883_SNP	9,62E-05	59	6	69	9	0,239024685	2R:11587378	tou	intron_variant	4,016634052	tou
X2R_7474883_SNP	9,62E-05	59	6	69	9	0,239024685	2R:11587378	tou	upstream_gene_variant	4,016634052
X2L_14421725_SNP	9,63E-05	59	6	72	6	0,239024685	2L:14421725	Cpr35B	downstream_gene_variant	4,016530322
X2L_14421725_SNP	9,63E-05	59	6	72	6	0,239024685	2L:14421725	Pburs	upstream_gene_variant	4,016530322
X2L_3709604_SNP	9,63E-05	62	4	73	5	0,239024685	2L:3709604	CG2818	upstream_gene_variant	4,016508216
X2L_3709604_SNP	9,63E-05	62	4	73	5	0,239024685	2L:3709604	CG31777	upstream_gene_variant	4,016508216
X2L_3709604_SNP	9,63E-05	62	4	73	5	0,239024685	2L:3709604	CG31778	upstream_gene_variant	4,016508216
X2L_3709604_SNP	9,63E-05	62	4	73	5	0,239024685	2L:3709604	CG31955	downstream_gene_variant	4,016508216
X2L_3709604_SNP	9,63E-05	62	4	73	5	0,239024685	2L:3709604	cutlet	intron_variant	4,016508216	cutlet
X2R_18288806_SNP	9,65E-05	63	3	69	9	0,2392975	2R:22401301	babos	intron_variant	4,015276916	babos
X2R_18288806_SNP	9,65E-05	63	3	69	9	0,2392975	2R:22401301	CG6044	upstream_gene_variant	4,015276916
X2R_18288806_SNP	9,65E-05	63	3	69	9	0,2392975	2R:22401301	CR44760	downstream_gene_variant	4,015276916
X2R_13514431_SNP	9,66E-05	60	5	66	7	0,2392975	2R:17626926	CG10936	intron_variant	4,014862358	CG10936
X2R_13514431_SNP	9,66E-05	60	5	66	7	0,2392975	2R:17626926	rhi	downstream_gene_variant	4,014862358
X3L_8543684_SNP	9,73E-05	56	10	61	16	0,240290957	3L:8550584	rhea	intron_variant	4,012079667	rhea
X2L_4376352_SNP	9,73E-05	23	40	34	43	0,240290957	2L:4376352	CG17612	downstream_gene_variant	4,011915682
X2L_4376352_SNP	9,73E-05	23	40	34	43	0,240290957	2L:4376352	Traf4	intron_variant	4,011915682	Traf4
X2R_9204636_SNP	9,76E-05	16	50	22	54	0,240304864	2R:13317131	-	intergenic_variant	4,010633356
X_6089070_SNP	9,76E-05	8	59	6	73	0,240304864	X:6195037	CG32750	synonymous_variant	4,010415109	CG32750
X_6089070_SNP	9,76E-05	8	59	6	73	0,240304864	X:6195037	Ca-alpha1T	upstream_gene_variant	4,010415109
X_6089070_SNP	9,76E-05	8	59	6	73	0,240304864	X:6195037	CG32751	downstream_gene_variant	4,010415109
X_6089070_SNP	9,76E-05	8	59	6	73	0,240304864	X:6195037	CG43090	downstream_gene_variant	4,010415109
X2L_14457339_SNP	9,77E-05	61	5	72	6	0,240304864	2L:14457339	CR44730	downstream_gene_variant	4,010175098
X3L_3742717_SNP	9,78E-05	34	33	34	44	0,240328171	3L:3742717	CG32264	synonymous_variant	4,009562663	CG32264
X3L_3742717_SNP	9,78E-05	34	33	34	44	0,240328171	3L:3742717	CG32264	intron_variant	4,009562663	CG32264
X2L_13931020_SNP	9,92E-05	31	34	29	43	0,243454614	2L:13931020	CG42711	synonymous_variant	4,003379768	CG42711
X2L_13931020_SNP	9,92E-05	31	34	29	43	0,243454614	2L:13931020	Ance-3	intron_variant	4,003379768	Ance-3
X2L_13931020_SNP	9,92E-05	31	34	29	43	0,243454614	2L:13931020	CG16885	downstream_gene_variant	4,003379768
X2L_17349022_SNP	9,96E-05	62	2	65	8	0,243699555	2L:17349022	CR43239	downstream_gene_variant	4,001897315
X2R_14710387_SNP	9,97E-05	2	65	6	71	0,243699555	2R:18822882	CG15097	synonymous_variant	4,001336685	CG15097
X2R_14710387_SNP	9,97E-05	2	65	6	71	0,243699555	2R:18822882	CG15097	3_prime_UTR_variant	4,001336685	CG15097
X2R_14710387_SNP	9,97E-05	2	65	6	71	0,243699555	2R:18822882	Phb2	downstream_gene_variant	4,001336685
X2R_12024473_INS	9,97E-05	49	13	49	19	0,243699555	2R:16136968	Got1	upstream_gene_variant	4,00123881
X2R_12024473_INS	9,97E-05	49	13	49	19	0,243699555	2R:16136968	spin	3_prime_UTR_variant	4,00123881	spin
X2R_12024473_INS	9,97E-05	49	13	49	19	0,243699555	2R:16136968	spin	intron_variant	4,00123881	spin
